# Supplementary material for: Transcriptome analysis of Pseudomonas aeruginosa PAO1 grown at both body and elevated temperatures
Source: PeerJ. 2016 Jul 19;4:e2223. doi: 10.7717/peerj.2223 (PMC4957987; doi:10.7717/peerj.2223)
Supplement: Supplemental Information 2 [file peerj-04-2223-s002.xlsx]

## Sheet: All_Genes
Gene ID	Gene Name	Value 1	Value 2	log2 (fold change)	Test Statistics	p value	q value
gene0	dnaA	3.83819	3.46219	-0.148738	0	1	1
gene1	dnaN	3.3902	2.82177	-0.264768	0	1	1
gene10	PA0011	4.61414	3.97682	-0.214447	0	1	1
gene100	PA0099	29.7865	4.74403	-2.65048	-3.77489	5e-05	0.000698837
gene1000	PA0981	13.8544	20.5976	0.572133	0.802954	0.1636	0.326881
gene1001	PA0982	1.13871	2.69307	1.24186	0	1	1
gene1002	PA0983	0	2.02531	inf	0	1	1
gene1003	PA0984	0	0	0	0	1	1
gene1004	pyoS5	52.8453	17.5083	-1.59374	-3.17122	5e-05	0.000698837
gene1005	PA0986	0	0	0	0	1	1
gene1006	PA0987	0	0.582426	inf	0	1	1
gene1007	PA0988	3.62096	2.92551	-0.307683	0	1	1
gene1008	PA0989	0	3.20293	inf	0	1	1
gene1009	PA0990	0	0.523	inf	0	1	1
gene101	PA0100	6.85444	2.62864	-1.38272	0	1	1
gene1010	cupC1	0.965732	1.39629	0.531905	0	1	1
gene1011	cupC2	0	0	0	0	1	1
gene1012	cupC3	0.561284	2.01603	1.84471	0	1	1
gene1013	ogt	2.02116	2.62109	0.374984	0	1	1
gene1014	pqsA	2.27924	0.341491	-2.73863	0	1	1
gene1015	pqsB	3.85891	0	-inf	0	1	1
gene1016	pqsC	0.795456	0	-inf	0	1	1
gene1017	pqsD	0.695514	0.526567	-0.401462	0	1	1
gene1018	pqsE	0.836713	0.330792	-1.33881	0	1	1
gene1019	phnA	7.59189	0.378052	-4.3278	-1.68311	0.18055	0.345575
gene102	PA0101	0.169155	0	-inf	0	1	1
gene1020	phnB	0.413831	0	-inf	0	1	1
gene1021	mvfR	1.9879	2.07334	0.0607119	0	1	1
gene1022	nadA	3.12807	1.37269	-1.18827	0	1	1
gene1023	PA1005	1.68764	2.3907	0.502425	0	1	1
gene1024	PA1006	0	0	0	0	1	1
gene1025	PA1007	1.21964	1.88711	0.629728	0	1	1
gene1026	bcp	0	1.29871	inf	0	1	1
gene1027	PA1009	0	1.82966	inf	0	1	1
gene1028	dapA	2.28371	0.878717	-1.37791	0	1	1
gene1029	PA1011	8.34142	8.68032	0.0574563	0.0849052	0.8803	0.928176
gene103	PA0102	0.322724	0.795652	1.30184	0	1	1
gene1030	PA1012	0.569081	1.33288	1.22784	0	1	1
gene1031	purC	6.54534	2.88098	-1.18391	0	1	1
gene1032	PA1013.1	0	0	0	0	1	1
gene1033	PA1014	2.50703	3.39171	0.436031	0	1	1
gene1034	PA1015	0.286625	0	-inf	0	1	1
gene1035	PA1016	0.257606	0.633072	1.2972	0	1	1
gene1036	pauA	0.260734	0.0748279	-1.80093	0	1	1
gene1037	PA1018	0.363137	0.562177	0.630513	0	1	1
gene1038	mucK	0	0.648531	inf	0	1	1
gene1039	PA1019a	0	0	0	0	1	1
gene104	PA0103	0	0.164548	inf	0	1	1
gene1040	PA1020	0.19305	0.15707	-0.297569	0	1	1
gene1041	PA1021	0	0.500805	inf	0	1	1
gene1042	PA1022	1.84447	1.43772	-0.359422	0	1	1
gene1043	PA1023	0	0.325414	inf	0	1	1
gene1044	PA1024	0	0.297594	inf	0	1	1
gene1045	PA1025	0.168691	0.36124	1.09857	0	1	1
gene1046	PA1026	0	0.481389	inf	0	1	1
gene1047	PA1027	0	0	0	0	1	1
gene1048	PA1028	0.163315	0	-inf	0	1	1
gene105	PA0103a	3.63327	3.18956	-0.18791	0	1	1
gene1050	PA1030	0.880199	1.85488	1.07542	0	1	1
gene1051	PA1030.1	0	0	0	0	1	1
gene1052	PA1031	0.432666	2.6861	2.63419	0	1	1
gene1053	quiP	0.106476	1.01886	3.25836	0	1	1
gene1054	PA1033	0.536606	0.49097	-0.128229	0	1	1
gene1055	PA1034	0	0	0	0	1	1
gene1056	PA1035	3.37423	2.83835	-0.249507	0	1	1
gene1057	PA1036	0.45673	0	-inf	0	1	1
gene1058	PA1037	0	2.25993	inf	0	1	1
gene1059	PA1038	1.11951	1.64968	0.559323	0	1	1
gene106	coxB	0.455555	2.16436	2.24824	0	1	1
gene1060	PA1039	0	0	0	0	1	1
gene1061	PA1040	0	0.451036	inf	0	1	1
gene1062	PA1041	0	0	0	0	1	1
gene1063	PA1042	0	3.85769	inf	0	1	1
gene1064	PA1043	0	0	0	0	1	1
gene1065	PA1044	0	0.837748	inf	0	1	1
gene1066	PA1045	0.632404	1.28324	1.02088	0	1	1
gene1067	PA1046	0.120148	0.289462	1.26857	0	1	1
gene1068	PA1047	0.831972	1.06794	0.360225	0	1	1
gene1069	PA1048	1.11924	0.532887	-1.07061	0	1	1
gene107	coxA	0	0.266153	inf	0	1	1
gene1070	pdxH	0.703151	0.620417	-0.180598	0	1	1
gene1071	PA1050	0	0.25741	inf	0	1	1
gene1072	PA1051	0.280228	0.194109	-0.529733	0	1	1
gene1073	PA1052	0	0	0	0	1	1
gene1074	PA1052a	0	1.66481	inf	0	1	1
gene1075	PA1053	41.8306	93.3374	1.15789	2.02782	0.00105	0.00970846
gene1076	PA1054	0.723482	0.722941	-0.00107836	0	1	1
gene1077	PA1055	6.45297	3.15453	-1.03254	0	1	1
gene1078	PA1056	0.440501	0.222642	-0.984415	0	1	1
gene1079	PA1057	1.21419	2.73626	1.17222	0	1	1
gene108	PA0107	0.463589	0.639363	0.463789	0	1	1
gene1080	PA1058	15.0149	3.47116	-2.11291	-0.841928	0.20955	0.378197
gene1081	PA1059	0.952686	1.3838	0.538567	0	1	1
gene1082	PA1060	0.454341	0	-inf	0	1	1
gene1083	PA1061	0.272617	0.421227	0.627722	0	1	1
gene1084	PA1062	0	0.700345	inf	0	1	1
gene1085	PA1063	0	0	0	0	1	1
gene1086	PA1064	0.677287	0.298951	-1.17986	0	1	1
gene1087	PA1065	0.831511	0.486052	-0.774626	0	1	1
gene1088	PA1066	0	0	0	0	1	1
gene1089	PA1067	0	0	0	0	1	1
gene109	coIII	0.718339	0.983276	0.452932	0	1	1
gene1090	PA1068	0	0.13875	inf	0	1	1
gene1091	PA1069	7.53594	1.91221	-1.97854	-2.60782	0.00025	0.00268304
gene1092	braG	1.15346	0.738723	-0.642867	0	1	1
gene1093	braF	1.58803	1.04332	-0.606054	0	1	1
gene1094	braE	0.475775	0.136615	-1.80017	0	1	1
gene1095	braD	0.911915	1.97458	1.11457	0	1	1
gene1096	braC	8.8924	6.58218	-0.434007	-0.611511	0.2868	0.457206
gene1097	PA1075	0	1.64968	inf	0	1	1
gene1098	PA1076	3.06551	2.03116	-0.593822	0	1	1
gene1099	flgB	7.59959	8.92207	0.231458	0.161002	0.76135	0.844671
gene11	PA0012	4.90902	4.78909	-0.0356821	0	1	1
gene110	PA0109	0	0	0	0	1	1
gene1100	flgC	4.07578	1.63165	-1.32075	0	1	1
gene1101	flgD	0.331418	2.41524	2.86544	0	1	1
gene1102	flgE	2.1517	0.509439	-2.07849	0	1	1
gene1103	flgF	7.87447	2.58738	-1.60569	-1.25092	0.03385	0.116251
gene1104	flgG	2.62948	1.7845	-0.559257	0	1	1
gene1105	flgH	26.7961	23.071	-0.215942	-0.363092	0.52475	0.658402
gene1106	flgI	0	0.157572	inf	0	1	1
gene1107	flgJ	2.05714	2.15491	0.066987	0	1	1
gene1108	flgK	2.78464	2.59504	-0.101732	0	1	1
gene1109	flgL	4.03797	3.60211	-0.164788	0	1	1
gene111	PA0110	0	0.370215	inf	0	1	1
gene1110	PA1088	4.59523	2.84505	-0.691684	0	1	1
gene1111	PA1089	1.99748	1.63804	-0.28621	0	1	1
gene1112	PA1090	0.681466	0.797866	0.227504	0	1	1
gene1113	fgtA	0.626187	0.763389	0.285826	0	1	1
gene1114	fliC	17.7852	14.9347	-0.252007	-0.465239	0.42055	0.570543
gene1115	PA1093	0	0.72054	inf	0	1	1
gene1116	fliD	13.5333	6.6493	-1.02524	-1.65814	0.0066	0.0357351
gene1117	PA1095	129.204	7.21324	-4.16286	-3.14279	0.00265	0.0191886
gene1118	PA1096	1.89919	6.92606	1.86665	0.67132	0.28565	0.456584
gene1119	fleQ	4.1866	10.8754	1.37722	2.0293	0.00275	0.0196756
gene112	PA0111	0	0	0	0	1	1
gene1120	fleS	0.564411	0.894411	0.664192	0	1	1
gene1121	fleR	2.53753	1.96997	-0.365247	0	1	1
gene1122	fliE	2.10389	0	-inf	0	1	1
gene1123	fliF	0.725917	0.7223	-0.00720539	0	1	1
gene1124	fliG	1.24128	1.18232	-0.0702065	0	1	1
gene1125	PA1103	0.794822	0.232677	-1.7723	0	1	1
gene1126	fliI	0.869709	0.797653	-0.124772	0	1	1
gene1127	fliJ	0	1.07615	inf	0	1	1
gene1128	PA1106	0.616762	1.42046	1.20357	0	1	1
gene1129	PA1107	0.423757	0.738068	0.800517	0	1	1
gene113	PA0112	0.369255	1.12052	1.60148	0	1	1
gene1130	PA1108	0	0.299813	inf	0	1	1
gene1131	PA1109	0	0.242998	inf	0	1	1
gene1132	PA1110	0	0.452232	inf	0	1	1
gene1133	PA1111	0	0.326584	inf	0	1	1
gene1134	PA1112	0.258397	1.0222	1.98401	0	1	1
gene1135	PA1112a	7.09164	18.356	1.37206	0.921799	0.433	0.578296
gene1136	PA1112.1	5.18896	18.5689	1.83937	1.14046	0.27385	0.441244
gene1137	PA1112b	9.72461	3.31536	-1.55248	0	1	1
gene1138	PA1113	0.481261	1.28263	1.41422	0	1	1
gene1139	PA1114	0	0	0	0	1	1
gene114	PA0113	0.339699	0.620628	0.869472	0	1	1
gene1140	PA1115	0.51083	0.618518	0.275973	0	1	1
gene1141	PA1116	1.02585	1.02745	0.00224922	0	1	1
gene1142	PA1117	0	0	0	0	1	1
gene1143	PA1118	0.70058	0.450661	-0.636506	0	1	1
gene1144	yfiB	1.27762	0.688116	-0.892732	0	1	1
gene1145	tpbB	0.320669	0.405667	0.33921	0	1	1
gene1146	yfiR	2.3002	0	-inf	0	1	1
gene1148	PA1123	2.20075	0	-inf	0	1	1
gene1149	dgt	0.250933	0.794036	1.6619	0	1	1
gene115	senC	8.39964	5.60508	-0.583591	-0.569993	0.33655	0.490938
gene1150	PA1125	0.434303	1.30263	1.58466	0	1	1
gene1151	PA1126	0	0	0	0	1	1
gene1152	PA1127	0.530147	0.592985	0.161603	0	1	1
gene1153	PA1128	0	0.656162	inf	0	1	1
gene1154	PA1129	0	0	0	0	1	1
gene1155	rhlC	0	0.586969	inf	0	1	1
gene1156	PA1131	0	0	0	0	1	1
gene1157	PA1132	1.98391	0.755974	-1.39194	0	1	1
gene1158	PA1133	0.938603	0	-inf	0	1	1
gene1159	PA1134	0	0	0	0	1	1
gene116	PA0115	0.892358	1.34004	0.586584	0	1	1
gene1160	PA1135	0.871925	1.90011	1.12381	0	1	1
gene1161	PA1136	0.771608	0.263799	-1.54843	0	1	1
gene1162	PA1137	1.64777	0.181332	-3.18381	0	1	1
gene1163	PA1138	0	0	0	0	1	1
gene1164	PA1139	0.372782	0	-inf	0	1	1
gene1165	PA1140	0.379502	1.72567	2.18498	0	1	1
gene1166	PA1141	0	0	0	0	1	1
gene1167	PA1142	0	0.447183	inf	0	1	1
gene1168	PA1143	0	0.506506	inf	0	1	1
gene1169	PA1144	0	0.396238	inf	0	1	1
gene117	PA0116	0	0	0	0	1	1
gene1170	PA1145	0.456218	2.04837	2.16668	0	1	1
gene1171	PA1146	0	0	0	0	1	1
gene1172	PA1147	0	0.11208	inf	0	1	1
gene1173	toxA	0	0	0	0	1	1
gene1174	PA1149	0	0	0	0	1	1
gene1175	pys2	96.6484	53.9177	-0.841987	-1.70527	0.0024	0.0178074
gene1176	imm2	134.36	56.4069	-1.25216	-1.83929	0.0038	0.0247286
gene1177	PA1153	0	1.37209	inf	0	1	1
gene1178	PA1154	0	1.31401	inf	0	1	1
gene1179	nrdB	63.8121	34.8794	-0.871454	-1.77239	0.0023	0.0172787
gene118	PA0117	0	0.851603	inf	0	1	1
gene1180	nrdA	11.3256	7.84312	-0.530093	-1.02148	0.07455	0.197377
gene1181	PA1157	0	0.428047	inf	0	1	1
gene1182	PA1158	0.280228	0.443183	0.661303	0	1	1
gene1183	PA1159	6.38411	2.30638	-1.46885	0	1	1
gene1184	PA1160	0.806721	2.8362	1.81382	0	1	1
gene1185	rrmA	0	0	0	0	1	1
gene1186	dapE	0	0.397906	inf	0	1	1
gene1187	ndvB	0.0752211	0.348395	2.21152	0	1	1
gene1188	PA1164	0	0	0	0	1	1
gene1189	pcpS	0.452991	0.265217	-0.772308	0	1	1
gene119	PA0118	0.4282	0.554656	0.373308	0	1	1
gene1190	PA1166	0	0.373823	inf	0	1	1
gene1191	PA1167	0.358451	0.590754	0.720782	0	1	1
gene1192	PA1168	0	0	0	0	1	1
gene1193	PA1169	0.352193	0.656807	0.899103	0	1	1
gene1194	PA1170	0.448171	1.19695	1.41724	0	1	1
gene1195	PA1171	0	0.830013	inf	0	1	1
gene1196	napC	0	2.19236	inf	0	1	1
gene1197	napB	0.785497	0	-inf	0	1	1
gene1198	napA	0.53858	1.06112	0.97836	0	1	1
gene1199	napD	0	0	0	0	1	1
gene12	PA0013	0.694315	2.88959	2.0572	0	1	1
gene120	PA0119	0.154688	0.982602	2.66724	0	1	1
gene1200	napF	0	0	0	0	1	1
gene1201	napE	0	12.179	inf	0	1	1
gene1202	oprH	40.6783	99.4149	1.2892	2.48325	5e-05	0.000698837
gene1203	phoP	2.52935	5.76974	1.18974	0	1	1
gene1204	phoQ	2.26934	5.7216	1.33415	0	1	1
gene1205	PA1181	0.158307	0.480596	1.6021	0	1	1
gene1206	PA1182	0	0.277734	inf	0	1	1
gene1207	dctA	2.76511	1.72772	-0.678469	0	1	1
gene1208	PA1184	0	0.658461	inf	0	1	1
gene1209	PA1185	0	0	0	0	1	1
gene121	PA0120	0	0.2868	inf	0	1	1
gene1210	PA1186	0	0	0	0	1	1
gene1211	PA1187	0.521595	1.29398	1.31082	0	1	1
gene1212	PA1188	0	0	0	0	1	1
gene1213	PA1189	0	0	0	0	1	1
gene1214	PA1190	0	0.539124	inf	0	1	1
gene1215	PA1191	1.63864	4.61314	1.49325	0	1	1
gene1216	PA1192	1.68504	3.86813	1.19885	0	1	1
gene1217	PA1193	0	1.643	inf	0	1	1
gene1218	PA1194	0.146229	0.184759	0.337419	0	1	1
gene1219	PA1195	1.12655	0.908781	-0.309908	0	1	1
gene122	PA0121	0	1.89203	inf	0	1	1
gene1220	PA1196	0	0.754249	inf	0	1	1
gene1221	PA1197	6.16145	4.15226	-0.569372	0	1	1
gene1222	PA1198	5.95066	7.3124	0.297296	0.269382	0.6904	0.797104
gene1223	PA1199	1.88021	2.08805	0.151262	0	1	1
gene1224	PA1200	0.729646	0	-inf	0	1	1
gene1225	PA1201	0	0.198888	inf	0	1	1
gene1226	PA1202	0	0	0	0	1	1
gene1227	PA1203	3.57593	0	-inf	0	1	1
gene1228	PA1204	0	0	0	0	1	1
gene1229	PA1205	0.325266	0	-inf	0	1	1
gene123	PA0122	22.2507	7.04145	-1.65991	-1.25789	0.05605	0.161952
gene1230	PA1206	0	0.762531	inf	0	1	1
gene1231	kefB	0.308453	1.19485	1.9537	0	1	1
gene1232	PA1208	0.440501	0.111321	-1.98442	0	1	1
gene1233	PA1209	0	0.30177	inf	0	1	1
gene1234	PA1210	0.340594	0.462677	0.441953	0	1	1
gene1235	PA1211	0	0	0	0	1	1
gene1236	PA1212	0	0	0	0	1	1
gene1237	PA1213	0.320317	0	-inf	0	1	1
gene1238	PA1214	0	0.161432	inf	0	1	1
gene1239	PA1215	0	0.349527	inf	0	1	1
gene124	PA0123	0.342462	0	-inf	0	1	1
gene1240	PA1216	0.312873	0	-inf	0	1	1
gene1241	PA1217	0	0.394809	inf	0	1	1
gene1242	PA1218	0.969604	2.86258	1.56185	0	1	1
gene1243	PA1219	0	0	0	0	1	1
gene1244	PA1220	0.16686	0	-inf	0	1	1
gene1245	PA1221	0.197164	0	-inf	0	1	1
gene1246	PA1222	0	0.383639	inf	0	1	1
gene1247	PA1223	0	0.204667	inf	0	1	1
gene1248	PA1224	0	1.48773	inf	0	1	1
gene1249	PA1225	0.785472	2.23	1.50541	0	1	1
gene125	PA0124	0	5.28334	inf	0	1	1
gene1250	PA1226	0	0	0	0	1	1
gene1251	PA1227	0	0.436514	inf	0	1	1
gene1252	PA1228	0	0	0	0	1	1
gene1253	PA1229	0	0	0	0	1	1
gene1254	PA1230	0	0	0	0	1	1
gene1255	PA1231	0	0	0	0	1	1
gene1256	PA1232	0.0979951	0.381549	1.96109	0	1	1
gene1257	PA1233	0	2.59207	inf	0	1	1
gene1258	PA1234	0	0	0	0	1	1
gene1259	PA1235	0	0	0	0	1	1
gene126	PA0125	0	8.29119	inf	0	1	1
gene1260	PA1236	0	0.532542	inf	0	1	1
gene1261	PA1237	0	0.247083	inf	0	1	1
gene1262	PA1238	0	0.115765	inf	0	1	1
gene1263	PA1239	0	0	0	0	1	1
gene1264	PA1240	0	0	0	0	1	1
gene1265	PA1241	0.45673	1.3874	1.60298	0	1	1
gene1266	PA1242	0	0.0923472	inf	0	1	1
gene1267	PA1243	0.395526	0.341685	-0.211106	0	1	1
gene1268	PA1244	9.23232	10.5326	0.1901	0.116561	0.85015	0.904319
gene1269	PA1245	0	0	0	0	1	1
gene127	PA0126	0.745833	0.328752	-1.18185	0	1	1
gene1270	aprD	0	0	0	0	1	1
gene1271	aprE	0.224026	0	-inf	0	1	1
gene1272	aprF	0.198191	0.348111	0.812655	0	1	1
gene1273	aprA	1.23585	0.730981	-0.757601	0	1	1
gene1274	aprI	0	0.647906	inf	0	1	1
gene1275	PA1251	0	0.426205	inf	0	1	1
gene1276	PA1252	0	0.177417	inf	0	1	1
gene1277	PA1253	0	0.268421	inf	0	1	1
gene1278	PA1254	0	0.309064	inf	0	1	1
gene1279	PA1255	0	0	0	0	1	1
gene128	PA0127	0	0.745486	inf	0	1	1
gene1280	PA1256	0	0.268101	inf	0	1	1
gene1281	PA1257	0.378269	0.487855	0.36704	0	1	1
gene1282	PA1258	0	0	0	0	1	1
gene1283	PA1259	0	0	0	0	1	1
gene1284	PA1260	0	0.454627	inf	0	1	1
gene1285	PA1261	0	0.752358	inf	0	1	1
gene1286	PA1262	0	0	0	0	1	1
gene1287	PA1263	0.560752	2.06478	1.88055	0	1	1
gene1288	PA1264	0.259969	0.544397	1.06632	0	1	1
gene1289	PA1265	0	0	0	0	1	1
gene129	PA0128	35.1882	35.0111	-0.0072788	-0.00934514	0.9511	0.964438
gene1290	PA1266	0	0	0	0	1	1
gene1291	PA1267	0.267423	0.244147	-0.131375	0	1	1
gene1292	PA1268	0.326527	0.191176	-0.772304	0	1	1
gene1293	PA1269	0	0.46428	inf	0	1	1
gene1294	PA1270	0.448183	0.246587	-0.861994	0	1	1
gene1295	PA1271	0.560144	0.731399	0.38486	0	1	1
gene1296	cobO	0	1.11106	inf	0	1	1
gene1297	cobB	0	0	0	0	1	1
gene1298	PA1274	0	0.475778	inf	0	1	1
gene1299	cobD	0	0	0	0	1	1
gene13	PA0014	0	0	0	0	1	1
gene130	gabP	0.725965	0.92142	0.343959	0	1	1
gene1300	cobC	0	0.473666	inf	0	1	1
gene1301	cobQ	0.395806	0.539912	0.44793	0	1	1
gene1302	cobP	0	0	0	0	1	1
gene1303	cobU	0.376816	0	-inf	0	1	1
gene1304	PA1280	0	0	0	0	1	1
gene1305	cobV	0	0	0	0	1	1
gene1306	PA1282	0	0.110821	inf	0	1	1
gene1307	PA1283	0	0	0	0	1	1
gene1308	PA1284	0.15314	0.146359	-0.0653338	0	1	1
gene1309	PA1285	0	0	0	0	1	1
gene131	PA0130	4.66876	6.15154	0.397908	0	1	1
gene1310	PA1286	0	0	0	0	1	1
gene1311	PA1287	2.19087	0.987211	-1.15008	0	1	1
gene1312	PA1288	9.35063	6.26644	-0.577418	-0.863642	0.1353	0.298953
gene1313	PA1289	0	0	0	0	1	1
gene1314	PA1290	0.422335	0	-inf	0	1	1
gene1315	PA1291	0	0	0	0	1	1
gene1316	PA1292	0.26444	0.909751	1.78253	0	1	1
gene1317	PA1293	0	0.166063	inf	0	1	1
gene1318	rnd	0.190656	0.651072	1.77185	0	1	1
gene1319	PA1295	8.51057	1.93835	-2.13442	-0.851272	0.3121	0.479724
gene132	PA0131	0	2.32302	inf	0	1	1
gene1320	PA1296	0.475697	0.832053	0.806631	0	1	1
gene1321	PA1297	0	0.284956	inf	0	1	1
gene1322	PA1298	0	0	0	0	1	1
gene1323	PA1299	0	0	0	0	1	1
gene1324	PA1300	0	0	0	0	1	1
gene1325	PA1301	0.410432	0	-inf	0	1	1
gene1326	PA1302	0.529699	1.29403	1.28862	0	1	1
gene1327	PA1303	0	0	0	0	1	1
gene1328	PA1304	0	0.457753	inf	0	1	1
gene1329	PA1305	0	0.486052	inf	0	1	1
gene133	PA0132	1.81252	3.23843	0.837296	0	1	1
gene1330	PA1306	0	1.35208	inf	0	1	1
gene1331	PA1307	2.63831	0	-inf	0	1	1
gene1332	PA1308	0	0	0	0	1	1
gene1333	PA1309	0.484228	0.21446	-1.17498	0	1	1
gene1334	phnW	0.267423	0.244147	-0.131375	0	1	1
gene1335	phnX	0	0.225236	inf	0	1	1
gene1336	PA1312	0	0.199693	inf	0	1	1
gene1337	PA1313	0	0	0	0	1	1
gene1338	PA1314	0	0	0	0	1	1
gene1339	PA1315	0	1.04177	inf	0	1	1
gene134	PA0133	0.446984	0.634478	0.505346	0	1	1
gene1340	PA1316	0	0.21582	inf	0	1	1
gene1341	cyoA	0.219982	1.78661	3.02177	0	1	1
gene1342	cyoB	2.30401	6.90831	1.58419	0	1	1
gene1343	cyoC	0	0	0	0	1	1
gene1344	cyoD	1.01334	0	-inf	0	1	1
gene1345	cyoE	0	0	0	0	1	1
gene1346	PA1322	0.214955	0.145892	-0.559138	0	1	1
gene1347	PA1323	0	0.878318	inf	0	1	1
gene1348	PA1324	0	2.25821	inf	0	1	1
gene1349	PA1324.1	0	0	0	0	1	1
gene135	PA0134	0	0.123291	inf	0	1	1
gene1350	PA1325	0	0	0	0	1	1
gene1351	ilvA2	0	0	0	0	1	1
gene1352	PA1327	0	0.210213	inf	0	1	1
gene1353	PA1328	0	0.200505	inf	0	1	1
gene1354	PA1329	0	0	0	0	1	1
gene1355	PA1330	0.71133	0.379369	-0.906918	0	1	1
gene1356	PA1331	0	0.283005	inf	0	1	1
gene1357	PA1332	0	0	0	0	1	1
gene1358	PA1333	0	0	0	0	1	1
gene1359	PA1334	0	0.414479	inf	0	1	1
gene136	PA0135	0	0	0	0	1	1
gene1360	PA1335	0.228277	0.133652	-0.772307	0	1	1
gene1361	PA1336	0.403514	0.614467	0.606718	0	1	1
gene1362	ansB	3.60974	0.322355	-3.48517	0	1	1
gene1363	ggt	0.557506	0.876002	0.651947	0	1	1
gene1364	PA1339	1.4899	0.934554	-0.672861	0	1	1
gene1365	PA1340	0	1.25245	inf	0	1	1
gene1366	PA1341	0	0.401192	inf	0	1	1
gene1367	PA1342	39.4284	23.0722	-0.773076	-1.46345	0.0119	0.0531996
gene1368	PA1343	0	0	0	0	1	1
gene1369	PA1344	0	0.370215	inf	0	1	1
gene137	PA0136	0	0.345076	inf	0	1	1
gene1370	PA1345	0	0	0	0	1	1
gene1371	PA1346	0	0.10744	inf	0	1	1
gene1372	PA1347	0.828641	2.13061	1.36245	0	1	1
gene1373	PA1348	0	0.275589	inf	0	1	1
gene1374	PA1349	0	0.798035	inf	0	1	1
gene1375	PA1350	0.436554	0	-inf	0	1	1
gene1376	PA1351	0	0.230044	inf	0	1	1
gene1377	PA1352	0	0.363709	inf	0	1	1
gene1378	PA1353	3.17616	2.564	-0.308886	0	1	1
gene1379	PA1354	0	0.574813	inf	0	1	1
gene138	PA0137	0	0.159612	inf	0	1	1
gene1380	PA1355	0	0	0	0	1	1
gene1381	PA1356	0	0	0	0	1	1
gene1382	PA1357	1.67662	0	-inf	0	1	1
gene1383	PA1358	0	0	0	0	1	1
gene1384	PA1359	0	0.304477	inf	0	1	1
gene1385	PA1360	0.962825	1.13802	0.241185	0	1	1
gene1386	PA1361	0.263509	0.365121	0.470526	0	1	1
gene1387	PA1362	19.5169	5.83337	-1.74232	-0.927092	0.0874	0.2268
gene1388	PA1363	0.90333	0.810866	-0.15579	0	1	1
gene1389	PA1364	0	0	0	0	1	1
gene139	PA0138	0.441621	1.12797	1.35285	0	1	1
gene1390	PA1365	0	0.17132	inf	0	1	1
gene1391	PA1366	0.601274	2.07613	1.7878	0	1	1
gene1392	PA1367	0	0.346786	inf	0	1	1
gene1393	PA1368	0.291073	1.10751	1.92786	0	1	1
gene1394	PA1369	104.664	30.1285	-1.79656	-3.47606	5e-05	0.000698837
gene1395	PA1370	6.19827	4.2755	-0.535771	0	1	1
gene1396	PA1371	92.4541	88.2559	-0.0670443	-0.0560169	0.92325	0.955756
gene1397	PA1372	104.431	82.3089	-0.343426	-0.590349	0.2985	0.468403
gene1398	fabF2	0	0.355287	inf	0	1	1
gene1399	PA1374	0	0.439142	inf	0	1	1
gene14	PA0015	2.26714	0	-inf	0	1	1
gene140	ahpC	52.7541	29.3776	-0.844564	-1.48526	0.01305	0.0572485
gene1400	pdxB	0	0	0	0	1	1
gene1401	aceK	1.56791	1.22477	-0.356332	0	1	1
gene1402	PA1377	2.11147	2.62802	0.315724	0	1	1
gene1403	PA1378	0	0	0	0	1	1
gene1404	PA1379	0	0.5904	inf	0	1	1
gene1405	PA1380	0	0.677792	inf	0	1	1
gene1406	PA1381	0	1.68528	inf	0	1	1
gene1407	PA1382	1.19111	2.70888	1.18538	0	1	1
gene1408	PA1383	0.512426	1.38241	1.43177	0	1	1
gene1409	galE	0.299792	2.35258	2.97221	0	1	1
gene141	ahpF	1.10115	3.71029	1.75252	0	1	1
gene1410	PA1385	0.540048	2.74025	2.34315	0	1	1
gene1411	PA1386	0.8012	1.90607	1.25037	0	1	1
gene1412	PA1387	0.314127	1.13707	1.85591	0	1	1
gene1413	PA1388	2.25301	2.32666	0.046409	0	1	1
gene1414	PA1389	0.331267	0.225185	-0.556887	0	1	1
gene1415	PA1390	0.210207	1.60974	2.93695	0	1	1
gene1416	PA1391	0.207151	0.799507	1.94843	0	1	1
gene1417	PA1392	0.479759	0.814286	0.763226	0	1	1
gene1418	cysC	0	2.07031	inf	0	1	1
gene1419	PA1394	0	0	0	0	1	1
gene142	PA0141	14.0413	7.31275	-0.941186	-1.30332	0.03085	0.108426
gene1420	PA1395	0	1.00194	inf	0	1	1
gene1421	PA1396	0.229069	0.585848	1.35475	0	1	1
gene1422	PA1397	0.547035	0.529898	-0.0459196	0	1	1
gene1423	PA1398	0	0	0	0	1	1
gene1424	PA1399	0	0.394592	inf	0	1	1
gene1425	PA1400	0.0810584	0.319978	1.98094	0	1	1
gene1426	PA1401	0	2.62744	inf	0	1	1
gene1427	PA1402	0	0.896854	inf	0	1	1
gene1428	PA1403	0	0	0	0	1	1
gene1429	PA1404	0	3.48937	inf	0	1	1
gene143	PA0142	0	0.125488	inf	0	1	1
gene1430	PA1405	0	0.324228	inf	0	1	1
gene1431	PA1406	0	0.503362	inf	0	1	1
gene1432	PA1407	0	0.19192	inf	0	1	1
gene1433	PA1408	0.147414	0.233577	0.664025	0	1	1
gene1434	aphA	0.290484	0.265251	-0.131105	0	1	1
gene1435	PA1410	0.910779	0.50105	-0.862147	0	1	1
gene1436	PA1411	0	0.199693	inf	0	1	1
gene1437	PA1412	0	0	0	0	1	1
gene1438	PA1413	0	0.657884	inf	0	1	1
gene1439	PA1414	8.59171	47.2851	2.46037	2.24087	0.00385	0.0247286
gene144	nuh	0.584088	0	-inf	0	1	1
gene1440	PA1415	1.24545	1.62403	0.382904	0	1	1
gene1441	PA1416	0.699826	0.366211	-0.934322	0	1	1
gene1442	PA1417	0	0	0	0	1	1
gene1443	PA1418	0.206959	1.72271	3.05726	0	1	1
gene1444	PA1419	0	0.392573	inf	0	1	1
gene1445	PA1420	1.39749	3.89501	1.47879	0	1	1
gene1446	gbuA	1.61381	0.495434	-1.70371	0	1	1
gene1447	gbuR	0.250441	0.524024	1.06516	0	1	1
gene1448	bdlA	1.96982	1.98219	0.00902857	0	1	1
gene1449	PA1424	0	0	0	0	1	1
gene145	PA0144	0.554214	0	-inf	0	1	1
gene1450	PA1424a	0	0	0	0	1	1
gene1451	PA1425	0	0	0	0	1	1
gene1452	PA1428a	0.976893	3.49883	1.8406	0	1	1
gene1453	PA1428	0	0.883585	inf	0	1	1
gene1454	PA1429	0.537071	0.360593	-0.574743	0	1	1
gene1455	lasR	10.5302	8.61376	-0.289824	-0.203467	0.7276	0.821969
gene1456	rsaL	627.92	209.122	-1.58624	-2.86187	5e-05	0.000698837
gene1457	lasI	62.0684	27.0521	-1.19812	-2.10094	0.0005	0.00500833
gene1458	PA1433	0	0.212338	inf	0	1	1
gene1459	PA1434	0	1.30104	inf	0	1	1
gene146	PA0145	0	0.664487	inf	0	1	1
gene1460	PA1435	0	0	0	0	1	1
gene1461	PA1436	0.085939	0.370894	2.10962	0	1	1
gene1462	PA1437	0	0	0	0	1	1
gene1463	PA1438	0	0	0	0	1	1
gene1464	PA1439	0	0.616636	inf	0	1	1
gene1465	PA1440	2.69599	4.41316	0.710996	0	1	1
gene1466	PA1441	0.390796	0.217543	-0.845115	0	1	1
gene1467	PA1442	0.958719	0	-inf	0	1	1
gene1468	fliM	6.28156	4.36859	-0.523954	0	1	1
gene1469	fliN	2.24419	0.972103	-1.20701	0	1	1
gene147	PA0146	0	0.829739	inf	0	1	1
gene1470	fliO	0	0	0	0	1	1
gene1471	fliP	1.27016	1.53909	0.277072	0	1	1
gene1472	fliQ	0	0	0	0	1	1
gene1473	fliR	0.297726	0	-inf	0	1	1
gene1474	flhB	0.606632	0.630819	0.0564031	0	1	1
gene1475	PA1450	0.167314	0.135862	-0.300421	0	1	1
gene1476	PA1451	0.43086	0.402927	-0.0967003	0	1	1
gene1477	flhA	1.60824	1.84475	0.197944	0	1	1
gene1478	flhF	4.44363	6.01386	0.436555	0	1	1
gene1479	fleN	1.51861	1.14631	-0.405749	0	1	1
gene148	PA0147	0	0.66511	inf	0	1	1
gene1480	fliA	7.04161	9.91268	0.493371	0.574423	0.31695	0.482245
gene1481	cheY	35.5537	20.6	-0.787352	-0.979151	0.09655	0.241777
gene1482	cheZ	11.7921	14.5177	0.3	0.435755	0.44085	0.583234
gene1483	PA1458	2.40783	2.28632	-0.0747056	0	1	1
gene1484	PA1459	0.38854	0.575229	0.566076	0	1	1
gene1485	motC	1.17448	0	-inf	0	1	1
gene1486	motD	0.463885	0	-inf	0	1	1
gene1487	PA1462	0.29207	0	-inf	0	1	1
gene1488	PA1463	0.351027	0	-inf	0	1	1
gene1489	PA1464	8.02835	6.33523	-0.341708	-0.254378	0.7089	0.809582
gene149	PA0148	0.464909	0.865063	0.895857	0	1	1
gene1490	PA1465	0	0	0	0	1	1
gene1491	PA1466	0	0.5736	inf	0	1	1
gene1492	PA1467	0	0.30323	inf	0	1	1
gene1493	PA1468	0	1.93831	inf	0	1	1
gene1494	PA1469	0.326147	0	-inf	0	1	1
gene1495	PA1470	0	0	0	0	1	1
gene1496	PA1471	0	2.99024	inf	0	1	1
gene1497	PA1472	0	0	0	0	1	1
gene1498	PA1473	0	1.47985	inf	0	1	1
gene1499	PA1474	0.33278	0.804973	1.27437	0	1	1
gene15	trkA	1.4019	2.39685	0.77376	0	1	1
gene150	PA0149	0	0	0	0	1	1
gene1500	ccmA	0	0	0	0	1	1
gene1501	ccmB	0	0	0	0	1	1
gene1502	ccmC	2.34872	0.66644	-1.81733	0	1	1
gene1503	PA1478	0	0	0	0	1	1
gene1504	ccmE	7.77617	0.92715	-3.06818	-1.16205	0.21505	0.382382
gene1505	ccmF	0.769278	0.431857	-0.832952	0	1	1
gene1506	ccmG	5.70436	5.22361	-0.127018	0	1	1
gene1507	ccmH	0	0.495649	inf	0	1	1
gene1508	cycH	1.46795	1.42165	-0.0462359	0	1	1
gene1509	PA1483a	0	0	0	0	1	1
gene151	PA0150	0	0	0	0	1	1
gene1510	PA1484	0	0.363204	inf	0	1	1
gene1511	PA1485	0	0	0	0	1	1
gene1512	PA1486	0	0.407192	inf	0	1	1
gene1513	PA1487	0	0.185205	inf	0	1	1
gene1514	PA1488	0	0.226786	inf	0	1	1
gene1515	PA1489	0.326652	0	-inf	0	1	1
gene1516	PA1490	0.552011	0	-inf	0	1	1
gene1517	PA1491	0	0.355501	inf	0	1	1
gene1518	PA1492	0	0	0	0	1	1
gene1519	cysP	6.11199	2.26654	-1.43115	0	1	1
gene152	PA0151	0	0.175504	inf	0	1	1
gene1520	PA1494	0	0.67242	inf	0	1	1
gene1521	PA1495	0	0	0	0	1	1
gene1522	PA1496	0	0	0	0	1	1
gene1523	PA1497	0	0	0	0	1	1
gene1524	pykF	0	0.182561	inf	0	1	1
gene1525	PA1499	0	0	0	0	1	1
gene1526	PA1500	0	0	0	0	1	1
gene1527	PA1501	1.68283	1.89943	0.174672	0	1	1
gene1528	gcl	0	1.30928	inf	0	1	1
gene1529	PA1503	0	0	0	0	1	1
gene153	pcaQ	0.384703	0.370602	-0.0538707	0	1	1
gene1530	PA1504	0	1.78148	inf	0	1	1
gene1531	moaA2	1.64149	1.24164	-0.402753	0	1	1
gene1532	PA1506	0	0	0	0	1	1
gene1533	PA1507	1.13083	0.572964	-0.980863	0	1	1
gene1534	PA1508	0	0	0	0	1	1
gene1535	PA1509	22.776	9.92586	-1.19825	-1.80905	0.00295	0.0206157
gene1536	PA1510	5.50493	2.72005	-1.01709	0	1	1
gene1537	PA1511	0.15558	0.199947	0.361962	0	1	1
gene1538	hcpA	0	0	0	0	1	1
gene1539	PA1513	0.757397	3.26888	2.10968	0	1	1
gene154	pcaH	0.788304	0.690569	-0.190966	0	1	1
gene1540	PA1514	0	0	0	0	1	1
gene1541	alc	0	0.293235	inf	0	1	1
gene1542	PA1516	0	0.670242	inf	0	1	1
gene1543	PA1517	1.14802	1.33982	0.222897	0	1	1
gene1544	PA1518	1.18762	0	-inf	0	1	1
gene1545	PA1519	0	0.330761	inf	0	1	1
gene1546	PA1520	1.2606	1.10836	-0.185675	0	1	1
gene1547	PA1521	0	0	0	0	1	1
gene1548	PA1522	0	0.221195	inf	0	1	1
gene1549	xdhB	0.575896	0.998645	0.794163	0	1	1
gene155	pcaG	0	1.09499	inf	0	1	1
gene1550	xdhA	0.535776	0.303593	-0.819491	0	1	1
gene1551	alkB2	0.986327	0.982632	-0.0054151	0	1	1
gene1552	PA1526	0	1.303	inf	0	1	1
gene1553	PA1527	3.97288	2.71985	-0.546658	0	1	1
gene1554	zipA	24.8322	45.7464	0.881446	1.65677	0.0039	0.0247286
gene1555	lig	0	0.881516	inf	0	1	1
gene1556	PA1530	0	0	0	0	1	1
gene1557	ffs	0.229848	0.292563	0.348067	0	1	1
gene1558	PA1531	2.30942	2.97016	0.363012	0	1	1
gene1559	dnaX	1.08886	0.759907	-0.518927	0	1	1
gene156	pcaR	0.377799	1.13284	1.58425	0	1	1
gene1560	PA1533	104.495	42.4434	-1.29983	-2.00187	0.00245	0.0179567
gene1561	recR	1.57665	0.347183	-2.18309	0	1	1
gene1562	PA1535	0.186042	0.55042	1.56491	0	1	1
gene1563	PA1536	0.911499	0	-inf	0	1	1
gene1564	PA1537	0	0.734799	inf	0	1	1
gene1565	PA1538	0	0.839487	inf	0	1	1
gene1566	PA1539	0.372782	2.41294	2.69439	0	1	1
gene1567	PA1540	0	0	0	0	1	1
gene1568	PA1541	0	1.88589	inf	0	1	1
gene1569	PA1542	0.922388	0.346786	-1.41133	0	1	1
gene157	PA0156	0.710679	0.880154	0.308559	0	1	1
gene1570	apt	0	0	0	0	1	1
gene1571	anr	5.95433	3.74724	-0.668113	0	1	1
gene1572	PA1545	83.5152	91.77	0.135983	0.25514	0.65125	0.770517
gene1573	hemN	8.30355	8.42582	0.0210903	0.033437	0.96395	0.968786
gene1574	PA1547	0	0.288476	inf	0	1	1
gene1575	PA1548	0	0	0	0	1	1
gene1576	PA1549	0.673809	0.808229	0.262423	0	1	1
gene1577	PA1550	11.1725	2.45467	-2.18635	-1.21413	0.07535	0.19862
gene1578	PA1551	9.28703	11.3111	0.284454	0.482656	0.40755	0.561736
gene1579	ccoP1	7.3732	3.54743	-1.05552	-1.08761	0.0652	0.178115
gene158	PA0157	0	0.164402	inf	0	1	1
gene1580	ccoQ1	0	0	0	0	1	1
gene1581	ccoO1	3.12423	2.7686	-0.174344	0	1	1
gene1582	ccoN1	3.16995	3.21703	0.0212731	0	1	1
gene1583	ccoP2	16.7355	5.37344	-1.63899	-2.09732	0.0037	0.0247078
gene1584	ccoQ2	18.9854	13.91	-0.448772	-0.21727	0.76725	0.845363
gene1585	ccoO2	12.123	3.7474	-1.69378	-1.27804	0.0486	0.148267
gene1586	ccoN2	14.3183	4.55088	-1.65364	-2.45509	0.00045	0.0045839
gene1587	PA1558	0	0.320248	inf	0	1	1
gene1589	aer	13.154	16.1709	0.297904	0.550576	0.34235	0.495789
gene159	PA0158	0.819899	0.449536	-0.867009	0	1	1
gene1590	acnA	2.82851	5.92392	1.06651	0	1	1
gene1591	PA1563	0.375534	0.699705	0.897803	0	1	1
gene1592	PA1564	0	1.70967	inf	0	1	1
gene1593	PA1565	0	1.04165	inf	0	1	1
gene1594	PA1566	0	0	0	0	1	1
gene1595	PA1567	1.01978	0.967406	-0.0760624	0	1	1
gene1596	PA1568	0	1.24491	inf	0	1	1
gene1597	PA1569	0.210581	0	-inf	0	1	1
gene1598	PA1570	0	2.41684	inf	0	1	1
gene1599	PA1571	0	3.31857	inf	0	1	1
gene16	PA0017	0.810124	0.521875	-0.634437	0	1	1
gene160	PA0159	0.236023	0.509082	1.10897	0	1	1
gene1600	PA1572	1.99969	2.63281	0.396828	0	1	1
gene1601	PA1573	0	1.66125	inf	0	1	1
gene1602	PA1574	0	0	0	0	1	1
gene1603	PA1575	2.92266	2.19601	-0.4124	0	1	1
gene1604	PA1576	0.259969	0.876185	1.7529	0	1	1
gene1605	PA1577	3.86543	2.16329	-0.837403	0	1	1
gene1606	PA1578	0.30817	0	-inf	0	1	1
gene1607	PA1578a	2.64768	0	-inf	0	1	1
gene1608	PA1579	9.36496	7.37877	-0.343892	-0.363617	0.5272	0.658726
gene1609	gltA	5.21954	5.41369	0.052688	0	1	1
gene161	PA0160	9.25315	9.03638	-0.0341991	0	1	1
gene1610	sdhC	49.4142	48.7297	-0.020124	-0.0297397	0.9682	0.969814
gene1611	sdhD	8.49661	16.4855	0.956242	0.617896	0.3134	0.480035
gene1612	sdhA	10.8454	13.0671	0.268848	0.492852	0.3933	0.54843
gene1613	sdhB	252.039	134.811	-0.902714	-1.85065	0.00135	0.0114275
gene1614	sucA	8.42561	5.88321	-0.518176	-0.95005	0.1018	0.248707
gene1615	sucB	15.8252	11.8496	-0.417383	-0.729417	0.20665	0.376669
gene1616	lpdG	1.7091	1.87235	0.131612	0	1	1
gene1617	sucC	29.0246	22.7275	-0.352842	-0.593226	0.3045	0.472534
gene1618	sucD	13.3858	8.14652	-0.716449	-0.571893	0.34075	0.494664
gene1619	braB	0.638012	0.936508	0.553708	0	1	1
gene162	opdC	0.599352	0.985493	0.717441	0	1	1
gene1620	PA1591	0.563275	1.18848	1.07721	0	1	1
gene1621	PA1592	8.33205	12.8285	0.622611	0.479385	0.30585	0.472534
gene1622	PA1593	0	0	0	0	1	1
gene1623	PA1594	0.911387	0	-inf	0	1	1
gene1624	PA1595	0	0	0	0	1	1
gene1625	htpG	8.62707	61.2625	2.82806	5.19305	5e-05	0.000698837
gene1626	PA1597	0	0	0	0	1	1
gene1627	PA1598	0	0.454627	inf	0	1	1
gene1628	PA1599	0	0.377502	inf	0	1	1
gene1629	PA1600	0	0.334727	inf	0	1	1
gene163	PA0163	0	0.236019	inf	0	1	1
gene1630	PA1601	0.370017	0.338168	-0.129851	0	1	1
gene1631	PA1602	1.04908	1.22596	0.22478	0	1	1
gene1632	PA1603	1.33764	0	-inf	0	1	1
gene1633	PA1604	0.700767	1.50783	1.10546	0	1	1
gene1634	PA1605	0.210207	0.876705	2.06028	0	1	1
gene1635	PA1606	0	1.23651	inf	0	1	1
gene1636	PA1607	0	0	0	0	1	1
gene1637	PA1608	0.904737	0.916827	0.0191512	0	1	1
gene1638	fabB	3.45575	4.43497	0.359927	0	1	1
gene1639	fabA	0	1.9538	inf	0	1	1
gene164	PA0164	0.475891	0.523462	0.137453	0	1	1
gene1640	PA1611	0.821656	0.565329	-0.539445	0	1	1
gene1641	PA1612	0	0.392972	inf	0	1	1
gene1642	PA1613	0.260757	0.715817	1.45688	0	1	1
gene1643	gpsA	5.14565	6.58522	0.355879	0	1	1
gene1644	PA1615	2.42377	0	-inf	0	1	1
gene1645	PA1616	0	1.00118	inf	0	1	1
gene1646	PA1617	0	0	0	0	1	1
gene1647	PA1618	0	0.864043	inf	0	1	1
gene1648	PA1619	0.386468	0.372326	-0.053783	0	1	1
gene1649	PA1620	0	0	0	0	1	1
gene165	PA0165	6.63273	4.91345	-0.432866	0	1	1
gene1650	PA1621	0.281379	0.379383	0.431139	0	1	1
gene1651	PA1622	0	0	0	0	1	1
gene1652	PA1623	3.80152	1.79206	-1.08496	0	1	1
gene1653	PA1624	0.283978	0.595881	1.06925	0	1	1
gene1654	PA1625	0.563476	1.29301	1.1983	0	1	1
gene1655	PA1626	0	0.342925	inf	0	1	1
gene1656	PA1627	0	0	0	0	1	1
gene1657	PA1628	0	0	0	0	1	1
gene1658	PA1629	0	0	0	0	1	1
gene1659	PA1630	1.8294	1.96498	0.103146	0	1	1
gene166	PA0166	0.442898	0.794235	0.842589	0	1	1
gene1660	PA1631	0	0.234447	inf	0	1	1
gene1661	kdpF	6.03907	3.05802	-0.98173	0	1	1
gene1662	kdpA	0	0.248322	inf	0	1	1
gene1663	kdpB	0	0	0	0	1	1
gene1664	kdpC	0	0	0	0	1	1
gene1665	kdpD	0	0.244735	inf	0	1	1
gene1666	kdpE	0	0.442863	inf	0	1	1
gene1667	PA1638	0.245443	0	-inf	0	1	1
gene1668	PA1639	0.580888	0	-inf	0	1	1
gene1669	PA1640	0.500981	0.607495	0.278117	0	1	1
gene167	PA0167	3.95579	5.07994	0.360847	0	1	1
gene1670	PA1641	0	0	0	0	1	1
gene1671	selD	0.210207	0.28089	0.418194	0	1	1
gene1672	PA1643	0.193658	0.648993	1.74469	0	1	1
gene1673	PA1643a	0	0	0	0	1	1
gene1674	PA1644	1.75177	1.92181	0.133656	0	1	1
gene1675	PA1645	1.05722	0	-inf	0	1	1
gene1676	PA1646	0.327197	0	-inf	0	1	1
gene1677	PA1647	0	0.0953843	inf	0	1	1
gene1678	PA1648	0	0	0	0	1	1
gene1679	PA1649	0.566163	0	-inf	0	1	1
gene168	PA0168	0	0.55069	inf	0	1	1
gene1680	PA1650	0.60001	1.58906	1.40512	0	1	1
gene1681	PA1651	0.324731	0.449656	0.469576	0	1	1
gene1682	PA1652	0	0	0	0	1	1
gene1683	PA1653	0	0	0	0	1	1
gene1684	PA1654	1.72477	1.74536	0.0171219	0	1	1
gene1685	PA1655	4.5216	2.16173	-1.06465	0	1	1
gene1686	PA1656	19.5494	2.11828	-3.20616	-3.53665	0.0001	0.00130652
gene1687	PA1657	6.91489	0.439142	-3.97695	0	1	1
gene1688	PA1658	22.6564	0.992143	-4.51323	-4.66897	0.0091	0.0463781
gene1689	PA1659	1.4629	0.616636	-1.24634	0	1	1
gene169	PA0169	0	0.706037	inf	0	1	1
gene1690	PA1660	3.54766	0.754625	-2.23304	0	1	1
gene1691	PA1661	0.735699	0	-inf	0	1	1
gene1692	PA1662	0.605722	0.340652	-0.830356	0	1	1
gene1693	PA1663	0.13619	0	-inf	0	1	1
gene1694	PA1664	0	0	0	0	1	1
gene1695	PA1665	0	0	0	0	1	1
gene1696	PA1666	3.10912	0	-inf	0	1	1
gene1697	PA1667	0.688833	0.66198	-0.0573683	0	1	1
gene1698	PA1668	1.2011	0	-inf	0	1	1
gene1699	PA1669	0.744333	0.143479	-2.37511	0	1	1
gene17	fmt	1.68226	1.78221	0.0832669	0	1	1
gene170	PA0170	1.60368	0	-inf	0	1	1
gene1700	stp1	0	0	0	0	1	1
gene1701	stk1	0	0	0	0	1	1
gene1702	PA1672	1.18762	0	-inf	0	1	1
gene1703	PA1673	88.1136	64.2424	-0.45584	-0.855851	0.13525	0.298953
gene1704	folE2	7.33259	11.6601	0.66919	0.659256	0.2023	0.371811
gene1705	PA1675	0	0.381924	inf	0	1	1
gene1706	PA1676	0	0	0	0	1	1
gene1707	PA1677	3.4066	1.43303	-1.24926	0	1	1
gene1708	PA1678	0.448801	0.397775	-0.174122	0	1	1
gene1709	PA1679	0.964304	0.379369	-1.34589	0	1	1
gene171	PA0171	2.73952	3.9232	0.518105	0	1	1
gene1710	PA1680	0.223175	0.298705	0.420544	0	1	1
gene1711	aroC	0.394775	0.674513	0.772817	0	1	1
gene1712	PA1682	0	0.633072	inf	0	1	1
gene1713	PA1683	0	1.91367	inf	0	1	1
gene1714	PA1684	2.31957	1.66573	-0.477702	0	1	1
gene1715	masA	0.436554	0	-inf	0	1	1
gene1716	alkA	0	0	0	0	1	1
gene1717	speE	0.746414	0.643379	-0.214307	0	1	1
gene1718	PA1688	2.89379	4.8065	0.732027	0	1	1
gene1719	PA1689	0.92596	1.19755	0.371069	0	1	1
gene172	PA0172	0.378073	0.340335	-0.151709	0	1	1
gene1720	pscU	0	0	0	0	1	1
gene1721	pscT	0	0.239457	inf	0	1	1
gene1722	PA1692	0	1.35737	inf	0	1	1
gene1723	pscR	2.48376	3.95329	0.670526	0	1	1
gene1724	pscQ	0	0.499118	inf	0	1	1
gene1725	pscP	0	0.245711	inf	0	1	1
gene1726	pscO	0	0	0	0	1	1
gene1727	PA1697	0	0.12843	inf	0	1	1
gene1728	popN	0	0.331787	inf	0	1	1
gene1729	PA1699	0	0	0	0	1	1
gene173	PA0173	0.206675	0.276047	0.417555	0	1	1
gene1730	PA1700	0	0	0	0	1	1
gene1731	PA1701	0	0	0	0	1	1
gene1732	PA1702	0	0	0	0	1	1
gene1733	pcrD	0.528686	0.716977	0.439516	0	1	1
gene1734	pcrR	0	0	0	0	1	1
gene1735	pcrG	0	0	0	0	1	1
gene1736	pcrV	1.54315	2.63111	0.769795	0	1	1
gene1737	pcrH	14.458	6.21846	-1.21724	-0.822892	0.194	0.364356
gene1738	popB	14.9865	12.2901	-0.286161	-0.443723	0.42955	0.577538
gene1739	popD	1.78917	0.661238	-1.43605	0	1	1
gene174	PA0174	0	0	0	0	1	1
gene1740	exsC	0	1.41386	inf	0	1	1
gene1741	PA1711	0	0	0	0	1	1
gene1742	exsB	0	1.96192	inf	0	1	1
gene1743	exsA	1.53228	3.37249	1.13813	0	1	1
gene1744	exsD	0.547722	1.41043	1.36462	0	1	1
gene1745	pscB	0	0	0	0	1	1
gene1746	pscC	0.60326	0.759711	0.33267	0	1	1
gene1747	pscD	0.609651	0.989672	0.698967	0	1	1
gene1748	pscE	34.6787	0	-inf	-nan	0.182	0.347244
gene1749	pscF	3.62265	16.213	2.16203	1.38225	0.2434	0.409926
gene175	PA0175	0	1.14631	inf	0	1	1
gene1750	pscG	0	0	0	0	1	1
gene1751	pscH	0	0.562049	inf	0	1	1
gene1752	pscI	0.997492	0	-inf	0	1	1
gene1753	pscJ	0.312873	1.24826	1.99627	0	1	1
gene1754	pscK	0	0	0	0	1	1
gene1755	pscL	2.48174	1.45278	-0.77254	0	1	1
gene1756	bglX	0.205265	0.356246	0.795387	0	1	1
gene1757	mucR	0.133903	0.122116	-0.132938	0	1	1
gene1758	PA1728	0	0	0	0	1	1
gene1759	PA1729	0.703151	0	-inf	0	1	1
gene176	aer2	0.919967	0.563197	-0.707942	0	1	1
gene1760	PA1730	0.878361	0.194785	-2.17293	0	1	1
gene1761	PA1731	0	0.188978	inf	0	1	1
gene1762	PA1732	0.286625	0.60157	1.06957	0	1	1
gene1763	PA1733	0	0	0	0	1	1
gene1764	PA1734	0	0	0	0	1	1
gene1765	PA1735	0.352496	0	-inf	0	1	1
gene1766	PA1736	0.741982	0	-inf	0	1	1
gene1767	PA1737	0.256001	0.122228	-1.06657	0	1	1
gene1768	PA1738	0	1.34515	inf	0	1	1
gene1769	PA1739	0.315517	0.288167	-0.130811	0	1	1
gene177	PA0177	0	0.467908	inf	0	1	1
gene1770	PA1740	0	0	0	0	1	1
gene1771	PA1741	0	0	0	0	1	1
gene1772	PA1742	6.30633	16.1357	1.35538	1.61379	0.0123	0.0543551
gene1773	PA1743	0	0	0	0	1	1
gene1774	PA1744	0	5.96324	inf	0	1	1
gene1775	PA1745	0	0.773947	inf	0	1	1
gene1776	PA1746	2.55523	2.63485	0.0442677	0	1	1
gene1777	PA1747	5.75726	0	-inf	0	1	1
gene1778	PA1748	2.86437	8.37441	1.54777	1.12032	0.0453	0.141886
gene1779	PA1749	0.560165	2.18512	1.96379	0	1	1
gene178	PA0178	0.543841	0.385517	-0.496392	0	1	1
gene1780	PA1750	16.6154	17.1379	0.0446731	0.0789761	0.89265	0.93627
gene1781	PA1751	0	2.37708	inf	0	1	1
gene1782	PA1752	1.22153	0.312704	-1.96582	0	1	1
gene1783	PA1753	2.62372	1.95585	-0.423816	0	1	1
gene1784	cysB	63.673	13.7047	-2.21601	-3.32536	5e-05	0.000698837
gene1785	PA1755	0	0	0	0	1	1
gene1786	cysH	1.25518	0.23378	-2.42467	0	1	1
gene1787	thrH	0.750895	0.661898	-0.182003	0	1	1
gene1788	pabB	0.153148	0.193619	0.338297	0	1	1
gene1789	PA1759	0.905396	1.70349	0.911875	0	1	1
gene179	PA0179	2.59881	1.91333	-0.441765	0	1	1
gene1790	PA1760	1.03275	1.16146	0.169455	0	1	1
gene1791	PA1761	0	0	0	0	1	1
gene1792	PA1762	0.305112	0	-inf	0	1	1
gene1793	PA1763	0.295582	0.456935	0.628429	0	1	1
gene1794	PA1764	0.176952	0.434289	1.2953	0	1	1
gene1795	PA1765	0.179002	0.982869	2.45702	0	1	1
gene1796	PA1766	12.6449	8.06838	-0.648203	-0.938269	0.09855	0.244746
gene1797	PA1767	3.02573	1.86132	-0.700958	0	1	1
gene1798	PA1768	2.9889	3.34681	0.163174	0	1	1
gene1799	PA1769	10.7313	8.30972	-0.368955	-0.475406	0.40025	0.555543
gene18	def	6.39053	2.78145	-1.2001	0	1	1
gene180	cttP	0.433851	0.472083	0.121841	0	1	1
gene1800	ppsA	6.09039	6.45896	0.0847682	0	1	1
gene1801	estX	0	0	0	0	1	1
gene1802	PA1772	6.50214	13.3732	1.04036	1.0018	0.0829	0.216621
gene1803	cmaX	3.33028	10.2239	1.61823	1.72921	0.00745	0.0385256
gene1804	crfX	0	2.66443	inf	0	1	1
gene1805	cmpX	78.4729	101.247	0.367607	0.755979	0.1852	0.352232
gene1806	sigX	28.564	36.1479	0.339716	0.541116	0.3468	0.498629
gene1807	oprF	100.312	79.9177	-0.327911	-0.683335	0.2209	0.389328
gene1808	cobA	0	0	0	0	1	1
gene1809	PA1779	0	0.0578755	inf	0	1	1
gene181	PA0181	0.237849	0	-inf	0	1	1
gene1810	nirD	0	0	0	0	1	1
gene1811	nirB	0.0804355	0.543375	2.75604	0	1	1
gene1812	PA1781.1	0	0	0	0	1	1
gene1813	PA1782	0	0.377254	inf	0	1	1
gene1814	nasA	0	0.232719	inf	0	1	1
gene1815	PA1784	0	0.930727	inf	0	1	1
gene1816	PA1785	0	0.601198	inf	0	1	1
gene1817	PA1786	0	0	0	0	1	1
gene1818	acnB	2.3655	1.71492	-0.464008	0	1	1
gene1819	PA1788	0	0.495649	inf	0	1	1
gene182	PA0182	0	0	0	0	1	1
gene1820	PA1789	6.83107	2.33449	-1.54901	0	1	1
gene1821	PA1790	0	0	0	0	1	1
gene1822	PA1791	3.66774	0.860612	-2.09146	0	1	1
gene1823	PA1792	0	0	0	0	1	1
gene1824	ppiB	6.48405	1.45936	-2.15155	0	1	1
gene1825	glnS	3.05447	3.34323	0.13032	0	1	1
gene1826	cysS	5.32062	8.27311	0.636833	0.8955	0.11725	0.275263
gene1827	folD	1.71605	1.91456	0.157921	0	1	1
gene1828	PA1796.1	0	0	0	0	1	1
gene1829	PA1796.2	0	0	0	0	1	1
gene183	atsA	0.230985	0.160084	-0.528969	0	1	1
gene1830	PA1796.3	0	0	0	0	1	1
gene1831	PA1796.4	0	0	0	0	1	1
gene1832	PA1797a	0	0	0	0	1	1
gene1833	PA1797	0	0.372981	inf	0	1	1
gene1834	parS	0.452872	1.52569	1.75229	0	1	1
gene1835	parR	1.09444	1.13648	0.0543862	0	1	1
gene1836	tig	6.74088	4.68233	-0.525712	0	1	1
gene1837	clpP	9.50374	10.7244	0.174326	0.201216	0.7266	0.821969
gene1838	clpX	55.3485	145.186	1.39129	2.83085	5e-05	0.000698837
gene1839	lon	32.829	101.139	1.6233	3.26832	5e-05	0.000698837
gene184	PA0184	0	0	0	0	1	1
gene1840	hupB	12.9853	4.68474	-1.47084	-0.825393	0.29545	0.466051
gene1841	PA1804.1	0	0	0	0	1	1
gene1842	ppiD	5.80747	5.85408	0.0115322	0	1	1
gene1843	fabI	1.26702	0.860627	-0.557979	0	1	1
gene1844	PA1807	0.126915	0.205477	0.695114	0	1	1
gene1845	PA1808	0.213862	0.446111	1.06073	0	1	1
gene1846	PA1809	0.753512	1.52464	1.01677	0	1	1
gene1847	PA1810	3.35684	3.51227	0.0652985	0	1	1
gene1848	PA1811	2.61799	1.77797	-0.558225	0	1	1
gene1849	mltD	2.05187	0.769551	-1.41485	0	1	1
gene185	PA0185	0.126393	0	-inf	0	1	1
gene1850	PA1813	0.71482	0.488403	-0.549509	0	1	1
gene1851	PA1814	0	0.641372	inf	0	1	1
gene1852	rnhA	3.4018	5.30259	0.640399	0	1	1
gene1853	dnaQ	0	0	0	0	1	1
gene1854	PA1817	5.79076	7.00445	0.27452	0.163096	0.7788	0.854122
gene1855	ldcA	1.44527	0.930526	-0.635221	0	1	1
gene1856	PA1819	0	0.319454	inf	0	1	1
gene1857	nhaB	0.439506	0.333211	-0.399445	0	1	1
gene1858	PA1821	1.32292	0.691505	-0.935913	0	1	1
gene1859	fimL	1.16319	0.249304	-2.22211	0	1	1
gene186	PA0186	0	1.4412	inf	0	1	1
gene1860	PA1823	1.57333	1.77141	0.171074	0	1	1
gene1861	PA1824	0	0.242998	inf	0	1	1
gene1862	PA1825	0	0	0	0	1	1
gene1863	PA1826	0.246426	0.330792	0.424767	0	1	1
gene1864	PA1827	0.427686	0	-inf	0	1	1
gene1865	PA1828	1.16464	0	-inf	0	1	1
gene1866	PA1829	1.94171	2.37348	0.289676	0	1	1
gene1867	PA1830	14.0917	0.975208	-3.853	-0.966546	0.10655	0.257175
gene1868	PA1831	0.953441	0.822176	-0.213696	0	1	1
gene1869	PA1832	2.64573	2.33965	-0.177371	0	1	1
gene187	PA0187	0	1.19457	inf	0	1	1
gene1870	PA1833	0	0	0	0	1	1
gene1871	PA1833a	1.24398	0.209895	-2.56722	0	1	1
gene1872	PA1835	0	1.41386	inf	0	1	1
gene1873	PA1836	0	0.562761	inf	0	1	1
gene1874	PA1837	0	0	0	0	1	1
gene1875	cysI	1.73803	0.361237	-2.26644	0	1	1
gene1876	PA1837a	5.02184	0	-inf	0	1	1
gene1877	PA1839	1.15007	0.340146	-1.7575	0	1	1
gene1878	PA1840	0.886118	0	-inf	0	1	1
gene1879	PA1841	0	0	0	0	1	1
gene188	PA0188	0.254588	0.532887	1.06567	0	1	1
gene1880	PA1842	3.04464	0	-inf	0	1	1
gene1881	metH	0.805265	0.936215	0.217377	0	1	1
gene1882	PA1844	0	0	0	0	1	1
gene1883	PA1845	0	0	0	0	1	1
gene1884	cti	0.741624	1.59715	1.10674	0	1	1
gene1885	PA1847	18.0686	15.0027	-0.268258	-0.366275	0.52675	0.658726
gene1886	PA1848	0	0	0	0	1	1
gene1887	PA1849	0	0	0	0	1	1
gene1888	PA1850	0	0	0	0	1	1
gene1889	PA1851	0	0.36582	inf	0	1	1
gene189	PA0189	0.15353	0.194109	0.338346	0	1	1
gene1890	PA1852	37.9956	26.0907	-0.542294	-0.544517	0.3344	0.490181
gene1891	PA1853	0.261072	0	-inf	0	1	1
gene1892	PA1854	0	0.245567	inf	0	1	1
gene1893	PA1855	0	0	0	0	1	1
gene1894	PA1856	0.261635	0.422781	0.692351	0	1	1
gene1895	PA1857	1.59595	0.896122	-0.832649	0	1	1
gene1896	str	0	0.225236	inf	0	1	1
gene1897	PA1859	0	0.339201	inf	0	1	1
gene1898	PA1860	0	0	0	0	1	1
gene1899	modC	0.198663	0.161706	-0.296947	0	1	1
gene19	PA0020	2.20961	2.25676	0.0304565	0	1	1
gene190	PA0190	0	0	0	0	1	1
gene1900	modB	0	0.448032	inf	0	1	1
gene1901	modA	1.23268	2.07678	0.752549	0	1	1
gene1902	PA1864	0.698705	0	-inf	0	1	1
gene1903	PA1865	0	0.196079	inf	0	1	1
gene1904	PA1866	0	0.429537	inf	0	1	1
gene1905	PA1866a	0	8.21777	inf	0	1	1
gene1906	xphA	0	0	0	0	1	1
gene1907	xqhA	0.116977	0.180147	0.622953	0	1	1
gene1908	PA1869	0	0	0	0	1	1
gene1909	PA1870	1.66815	1.8706	0.165253	0	1	1
gene191	PA0191	0	0.618128	inf	0	1	1
gene1910	lasA	0.474462	0.359233	-0.401371	0	1	1
gene1911	PA1872	0.407015	1.90083	2.22347	0	1	1
gene1912	PA1873	0	0.555757	inf	0	1	1
gene1913	PA1874	0.363615	1.14342	1.65288	0	1	1
gene1914	PA1875	0	0.352384	inf	0	1	1
gene1915	PA1876	0	0.189081	inf	0	1	1
gene1916	PA1877	0.576106	0	-inf	0	1	1
gene1917	PA1878	0.823485	0	-inf	0	1	1
gene1918	PA1879	0	0	0	0	1	1
gene1919	PA1880	0	0.544247	inf	0	1	1
gene192	PA0192	0	0.23899	inf	0	1	1
gene1920	PA1881	0	0.846453	inf	0	1	1
gene1921	PA1882	1.5973	0	-inf	0	1	1
gene1922	PA1883	0	0	0	0	1	1
gene1923	PA1884	0	0.387884	inf	0	1	1
gene1924	PA1885	0	0.813821	inf	0	1	1
gene1925	polB	0.115216	0	-inf	0	1	1
gene1926	PA1887	0.507557	0.761434	0.585147	0	1	1
gene1927	PA1888	0.67654	0	-inf	0	1	1
gene1928	PA1889	0	0.283901	inf	0	1	1
gene1929	PA1890	0.557874	0.979752	0.812478	0	1	1
gene193	PA0193	0	0	0	0	1	1
gene1930	PA1891	0	0	0	0	1	1
gene1931	PA1892	0.317722	0	-inf	0	1	1
gene1932	PA1893	0	0.334942	inf	0	1	1
gene1933	PA1894	0.828641	2.57348	1.6349	0	1	1
gene1934	PA1895	0.165069	0.781587	2.24334	0	1	1
gene1935	PA1896	0	0.473509	inf	0	1	1
gene1936	PA1897	0.423385	0.247885	-0.772302	0	1	1
gene1937	qscR	0.616762	0.722238	0.22776	0	1	1
gene1938	phzA2	0	0	0	0	1	1
gene1939	phzB2	0	0.463575	inf	0	1	1
gene194	PA0194	0	0.202982	inf	0	1	1
gene1940	phzC2	0	0	0	0	1	1
gene1941	phzD2	0	0	0	0	1	1
gene1942	phzE2	0	0	0	0	1	1
gene1943	phzF2	0	0	0	0	1	1
gene1944	phzG2	0	0	0	0	1	1
gene1945	PA1906	0	0	0	0	1	1
gene1946	PA1907	0.124349	0.32878	1.40273	0	1	1
gene1947	PA1908	0	0	0	0	1	1
gene1948	PA1909	0	0.150824	inf	0	1	1
gene1949	femA	0	0	0	0	1	1
gene195	pntAA	0.266576	0.880066	1.72306	0	1	1
gene1950	femR	0	0	0	0	1	1
gene1951	femI	0	0	0	0	1	1
gene1952	PA1913	1.20022	0	-inf	0	1	1
gene1953	PA1914	0	0.447812	inf	0	1	1
gene1954	PA1915	0.183507	0.510407	1.47581	0	1	1
gene1955	PA1916	0	0.278633	inf	0	1	1
gene1956	PA1917	0	0	0	0	1	1
gene1957	PA1918	0.270613	0.393399	0.539764	0	1	1
gene1958	nrdG	0.975076	0	-inf	0	1	1
gene1959	nrdD	0.17895	0.289295	0.692979	0	1	1
gene196	pntAB	0	0	0	0	1	1
gene1960	PA1921	0	0	0	0	1	1
gene1961	PA1922	0	0	0	0	1	1
gene1962	PA1923	0.050016	0.0805031	0.686654	0	1	1
gene1963	PA1924	0.823479	0.804614	-0.0334341	0	1	1
gene1964	PA1925	3.1384	0	-inf	0	1	1
gene1965	PA1926	0.524662	1.24046	1.24142	0	1	1
gene1966	metE	0	0.252143	inf	0	1	1
gene1967	rimJ	0.89362	0.985503	0.141198	0	1	1
gene1968	PA1929	1.27283	0	-inf	0	1	1
gene1969	PA1930	0.386648	0.625207	0.693313	0	1	1
gene197	pntB	0	0.191067	inf	0	1	1
gene1970	PA1931	0	0	0	0	1	1
gene1971	PA1932	0	0	0	0	1	1
gene1972	PA1933	0.287557	0.404203	0.491233	0	1	1
gene1973	PA1934	0	0	0	0	1	1
gene1974	PA1937	0	1.01192	inf	0	1	1
gene1975	PA1938	0	0	0	0	1	1
gene1976	PA1939	8.32965	4.10377	-1.0213	-1.59073	0.0075	0.0385256
gene1977	PA1940	0.531696	1.01363	0.930859	0	1	1
gene1978	PA1941	0.399072	0.0857613	-2.21825	0	1	1
gene1979	PA1942	0	0	0	0	1	1
gene198	tonB2	0	0	0	0	1	1
gene1980	PA1943	0	0	0	0	1	1
gene1981	PA1944	0.522385	1.51683	1.53787	0	1	1
gene1982	PA1945	0.287525	0	-inf	0	1	1
gene1983	rbsB	2.30335	5.94423	1.36775	0	1	1
gene1984	rbsA	0	0.108623	inf	0	1	1
gene1985	rbsC	0.305224	0	-inf	0	1	1
gene1986	rbsR	0	0.175522	inf	0	1	1
gene1987	rbsK	0	0	0	0	1	1
gene1988	PA1951	0.470566	0.270234	-0.800187	0	1	1
gene1989	PA1952	0	0	0	0	1	1
gene199	exbB1	0	1.84954	inf	0	1	1
gene1990	PA1953	2.30552	3.64235	0.659776	0	1	1
gene1991	PA1954	0	0	0	0	1	1
gene1992	PA1955	0	0	0	0	1	1
gene1993	PA1956	0	0	0	0	1	1
gene1994	PA1957	0	0	0	0	1	1
gene1995	PA1958	0	0.365079	inf	0	1	1
gene1996	bacA	0.762439	1.6272	1.09369	0	1	1
gene1997	PA1960	0	0	0	0	1	1
gene1998	PA1961	0	0.704519	inf	0	1	1
gene1999	azoR2	0	0.337718	inf	0	1	1
gene2	recF	4.54138	7.23994	0.672847	0.584491	0.33035	0.489837
gene20	PA0021	0	0	0	0	1	1
gene200	exbD1	0	3.12865	inf	0	1	1
gene2000	PA1963	6.6712	1.35737	-2.29713	0	1	1
gene2001	PA1964	0.476937	0.27131	-0.813853	0	1	1
gene2002	PA1965	2.03007	0	-inf	0	1	1
gene2003	PA1966	0	0	0	0	1	1
gene2004	PA1967	2.80484	0.447001	-2.64957	0	1	1
gene2005	PA1968	3.62265	2.37774	-0.607457	0	1	1
gene2006	PA1969	0	0	0	0	1	1
gene2007	PA1970	0	0	0	0	1	1
gene2008	braZ	0.512403	0.517765	0.0150184	0	1	1
gene2009	PA1972	0	0.246862	inf	0	1	1
gene201	PA0200	125.023	91.6279	-0.448339	-0.607242	0.2855	0.456584
gene2010	pqqF	0	0	0	0	1	1
gene2011	PA1974	0	0.379242	inf	0	1	1
gene2012	PA1975	0	0	0	0	1	1
gene2013	ercS'	0.102087	0.0597698	-0.77231	0	1	1
gene2014	PA1977	0	0	0	0	1	1
gene2015	PA1978	0.362674	0	-inf	0	1	1
gene2016	eraS	0	0	0	0	1	1
gene2017	eraR	0	0.482158	inf	0	1	1
gene2018	PA1981	0	0	0	0	1	1
gene2019	exaA	0	0	0	0	1	1
gene202	PA0201	0	0.719564	inf	0	1	1
gene2020	exaB	0	0	0	0	1	1
gene2021	exaC	0	0.109589	inf	0	1	1
gene2022	pqqA	0	0	0	0	1	1
gene2023	pqqB	0.243499	0.326742	0.424235	0	1	1
gene2024	pqqC	0	0	0	0	1	1
gene2025	pqqD	0	1.99693	inf	0	1	1
gene2026	pqqE	0.259192	0.388368	0.583404	0	1	1
gene2027	pqqH	0	0.374336	inf	0	1	1
gene2028	PA1991	0.335587	0.24407	-0.459393	0	1	1
gene2029	ercS	0.458168	0.309778	-0.564641	0	1	1
gene203	PA0202	0	0.17915	inf	0	1	1
gene2030	PA1993	0	0	0	0	1	1
gene2031	PA1994	0	0	0	0	1	1
gene2032	PA1995	0	0	0	0	1	1
gene2033	ppiC1	0	0	0	0	1	1
gene2034	PA1997	0.327748	0.423962	0.371346	0	1	1
gene2035	dhcR	0	0	0	0	1	1
gene2036	dhcA	0	0.437812	inf	0	1	1
gene2037	dhcB	0	0.304477	inf	0	1	1
gene2038	atoB	0	0.146347	inf	0	1	1
gene2039	PA2002	0	0.235962	inf	0	1	1
gene204	PA0203	0	0.438352	inf	0	1	1
gene2040	bdhA	0	0.812678	inf	0	1	1
gene2041	PA2004	0.479576	0.242341	-0.984723	0	1	1
gene2042	PA2005	0.143165	0.189708	0.406106	0	1	1
gene2043	PA2006	0	0.320265	inf	0	1	1
gene2044	maiA	0	0.494124	inf	0	1	1
gene2045	fahA	0.161599	0	-inf	0	1	1
gene2046	hmgA	1.29925	0.875692	-0.569179	0	1	1
gene2047	PA2010	0	0	0	0	1	1
gene2048	liuE	0.69054	0	-inf	0	1	1
gene2049	liuD	0	0.50954	inf	0	1	1
gene205	PA0204	0	0	0	0	1	1
gene2050	liuC	2.17597	1.0132	-1.10275	0	1	1
gene2051	liuB	0.303021	0.657215	1.11695	0	1	1
gene2052	liuA	2.09651	2.25748	0.106724	0	1	1
gene2053	liuR	50.4416	44.8135	-0.170682	-0.256158	0.64715	0.770517
gene2054	PA2017	0.332983	0.194955	-0.772304	0	1	1
gene2055	PA2018	0.297558	0.15526	-0.938483	0	1	1
gene2056	PA2019	0	0.145055	inf	0	1	1
gene2057	PA2020	0	0	0	0	1	1
gene2058	PA2021	0	0	0	0	1	1
gene2059	PA2022	0	0	0	0	1	1
gene206	PA0205	0	0.97229	inf	0	1	1
gene2060	galU	9.10113	8.81069	-0.04679	-0.061252	0.94155	0.963389
gene2061	PA2024	0	0	0	0	1	1
gene2062	gor	8.1537	4.85151	-0.749021	-0.976126	0.08755	0.2268
gene2063	PA2026	0	0.178058	inf	0	1	1
gene2064	PA2027	2.25202	1.6909	-0.413427	0	1	1
gene2065	PA2028	0	0	0	0	1	1
gene2066	PA2029	0	0	0	0	1	1
gene2067	PA2030	2.57714	1.46117	-0.818646	0	1	1
gene2068	PA2031	1.7326	0	-inf	0	1	1
gene2069	PA2032	0	0.117981	inf	0	1	1
gene207	PA0206	0	0.414479	inf	0	1	1
gene2070	PA2033	0	0	0	0	1	1
gene2071	PA2034	0	0	0	0	1	1
gene2072	PA2035	0.53839	0.763007	0.503045	0	1	1
gene2073	PA2036	0	1.54163	inf	0	1	1
gene2074	PA2037	6.47158	3.63761	-0.831126	0	1	1
gene2075	PA2038	1.13927	0	-inf	0	1	1
gene2076	PA2039	0.875714	1.45238	0.729891	0	1	1
gene2077	PA2040	0.151264	1.07377	2.82754	0	1	1
gene2078	PA2041	1.01086	0.384328	-1.39517	0	1	1
gene2079	PA2042	0.553182	0.22873	-1.27411	0	1	1
gene208	PA0207	0.250441	1.58906	2.66564	0	1	1
gene2080	PA2043	0	0	0	0	1	1
gene2081	PA2044	0.450769	1.04931	1.21898	0	1	1
gene2082	PA2045	0	0	0	0	1	1
gene2084	PA2047	0	0.180668	inf	0	1	1
gene2085	PA2048	0	0	0	0	1	1
gene2086	PA2049	0	0.0811057	inf	0	1	1
gene2087	PA2050	0	0	0	0	1	1
gene2088	PA2051	0	0	0	0	1	1
gene2089	cynS	0	0.820854	inf	0	1	1
gene209	mdcA	0	0.359782	inf	0	1	1
gene2090	cynT	0	0	0	0	1	1
gene2091	cynR	0.252497	0.545581	1.11153	0	1	1
gene2092	PA2055	0	0.118834	inf	0	1	1
gene2093	PA2056	0	0	0	0	1	1
gene2094	PA2057	0.246729	0.194408	-0.343837	0	1	1
gene2095	PA2058	0	0.468778	inf	0	1	1
gene2096	PA2059	0	0.255532	inf	0	1	1
gene2097	PA2060	0.214608	0	-inf	0	1	1
gene2098	PA2061	0.175477	0.205477	0.227692	0	1	1
gene2099	PA2062	0	0	0	0	1	1
gene21	PA0022	0	0.979588	inf	0	1	1
gene210	PA0209	0	0	0	0	1	1
gene2100	PA2063	0	0	0	0	1	1
gene2101	pcoB	0	0	0	0	1	1
gene2102	pcoA	0	0.225331	inf	0	1	1
gene2103	PA2066	0.716831	0	-inf	0	1	1
gene2104	PA2067	0	0	0	0	1	1
gene2105	PA2068	0.335587	0	-inf	0	1	1
gene2106	PA2069	0.117686	0	-inf	0	1	1
gene2107	PA2070	0.0742225	0.0931896	0.328313	0	1	1
gene2108	fusA2	0.396357	1.90723	2.2666	0	1	1
gene2109	PA2072	0.075684	0.156064	1.04408	0	1	1
gene211	mdcC	0	1.85817	inf	0	1	1
gene2110	PA2073	0	0	0	0	1	1
gene2111	PA2074	0	0	0	0	1	1
gene2112	PA2075	0.122613	0.415884	1.76207	0	1	1
gene2113	PA2076	0.742253	0.315418	-1.23465	0	1	1
gene2114	PA2077	0	0	0	0	1	1
gene2115	PA2078	0	0	0	0	1	1
gene2116	PA2079	0.295266	0.741392	1.32822	0	1	1
gene2117	kynU	1.58173	0.909216	-0.798808	0	1	1
gene2118	kynB	0	0	0	0	1	1
gene2119	PA2082	1.92432	1.23651	-0.638076	0	1	1
gene212	mdcD	0.364709	0	-inf	0	1	1
gene2120	PA2083	0.393966	0.134015	-1.55568	0	1	1
gene2121	PA2084	0	0.0890127	inf	0	1	1
gene2122	PA2085	0	0	0	0	1	1
gene2123	PA2086	0	0	0	0	1	1
gene2124	PA2087	0	1.00666	inf	0	1	1
gene2125	PA2088	0.266734	0	-inf	0	1	1
gene2126	PA2089	0.10184	0.309262	1.60253	0	1	1
gene2127	PA2090	0	0	0	0	1	1
gene2128	PA2091	0.299212	0	-inf	0	1	1
gene2129	PA2092	0	0.225489	inf	0	1	1
gene213	mdcE	0	0.232677	inf	0	1	1
gene2130	PA2093	1.26659	0	-inf	0	1	1
gene2131	PA2094	0	0	0	0	1	1
gene2132	PA2095	0.374439	1.14119	1.60773	0	1	1
gene2133	PA2096	0	0	0	0	1	1
gene2134	PA2097	0	0.113369	inf	0	1	1
gene2135	PA2098	0	0	0	0	1	1
gene2136	PA2099	0	0	0	0	1	1
gene2137	PA2100	1.52739	4.21579	1.46473	0	1	1
gene2138	PA2101	6.35104	5.02681	-0.337348	0	1	1
gene2139	PA2102	1.17004	5.13769	2.13457	0	1	1
gene214	PA0213	0	0	0	0	1	1
gene2140	PA2103	0.431283	4.14814	3.26576	0	1	1
gene2141	PA2104	0	2.7829	inf	0	1	1
gene2142	PA2105	0.481467	1.0041	1.06039	0	1	1
gene2143	PA2106	1.68047	0.672159	-1.32199	0	1	1
gene2144	PA2107	0	1.08046	inf	0	1	1
gene2145	PA2108	0	0	0	0	1	1
gene2146	PA2109	0	0	0	0	1	1
gene2147	PA2110	0	0	0	0	1	1
gene2148	PA2111	0	0	0	0	1	1
gene2149	PA2112	0.314473	0	-inf	0	1	1
gene215	PA0214	0	0	0	0	1	1
gene2150	opdO	0	0.139712	inf	0	1	1
gene2151	PA2114	0	0.268761	inf	0	1	1
gene2152	PA2115	0	0	0	0	1	1
gene2153	PA2116	0.403118	0	-inf	0	1	1
gene2154	PA2117	0	0	0	0	1	1
gene2155	ada	0	0	0	0	1	1
gene2156	PA2118a	0	1.66481	inf	0	1	1
gene2157	PA2119	0.944981	0.508858	-0.893023	0	1	1
gene2158	PA2120	0	0	0	0	1	1
gene2159	PA2121	0	1.23222	inf	0	1	1
gene216	PA0215	0	0	0	0	1	1
gene2160	PA2122	0	0.391992	inf	0	1	1
gene2161	PA2123	0	0.194188	inf	0	1	1
gene2162	PA2124	0	0.25798	inf	0	1	1
gene2163	PA2125	0.197726	0.115765	-0.772308	0	1	1
gene2164	PA2126	0.721508	0.318189	-1.18113	0	1	1
gene2165	PA2127	4.45042	6.81056	0.613833	0	1	1
gene2166	cupA1	0	0.387884	inf	0	1	1
gene2167	cupA2	0.438829	0	-inf	0	1	1
gene2168	cupA3	0	0.19695	inf	0	1	1
gene2169	cupA4	0.212173	0.599997	1.49971	0	1	1
gene217	PA0216	0.303605	0.249137	-0.285256	0	1	1
gene2170	cupA5	0	0	0	0	1	1
gene2171	PA2133	0	0	0	0	1	1
gene2172	PA2134	0	0	0	0	1	1
gene2173	PA2135	0.278812	0	-inf	0	1	1
gene2174	PA2136	0	0	0	0	1	1
gene2175	PA2137	0	0	0	0	1	1
gene2176	PA2138	0.24862	0.200459	-0.310638	0	1	1
gene2178	PA2140	0	0	0	0	1	1
gene2179	PA2141	0	0	0	0	1	1
gene218	PA0217	0.665966	4.77466	2.84188	0	1	1
gene2180	PA2142	0	0	0	0	1	1
gene2181	PA2142a	0	0	0	0	1	1
gene2182	PA2143	0	0	0	0	1	1
gene2183	glgP	0.111406	0.643094	2.52921	0	1	1
gene2184	PA2145	0	0	0	0	1	1
gene2185	PA2146	0	0	0	0	1	1
gene2186	katE	0	0.123168	inf	0	1	1
gene2187	PA2148	0	0	0	0	1	1
gene2188	PA2149	0	0	0	0	1	1
gene2189	PA2150	0	0.550222	inf	0	1	1
gene219	PA0218	0.445182	0.521393	0.227975	0	1	1
gene2190	PA2151	0	0.339774	inf	0	1	1
gene2191	PA2152	0.13932	0.150445	0.110837	0	1	1
gene2192	glgB	0	0	0	0	1	1
gene2193	PA2154	0	0.179353	inf	0	1	1
gene2194	PA2155	0	0.23408	inf	0	1	1
gene2195	PA2156	0	0.261007	inf	0	1	1
gene2196	PA2157	0	0	0	0	1	1
gene2197	PA2158	0	0	0	0	1	1
gene2198	PA2159	0	0.595045	inf	0	1	1
gene2199	PA2160	0.0925391	0.0747146	-0.308674	0	1	1
gene22	qor	0.951482	0.953679	0.00332682	0	1	1
gene220	PA0219	0	0	0	0	1	1
gene2200	PA2161	0	0	0	0	1	1
gene2201	PA2162	0.0968061	0.0882579	-0.133372	0	1	1
gene2202	PA2163	0	0	0	0	1	1
gene2203	PA2164	0.115693	0	-inf	0	1	1
gene2204	PA2165	0	0.352676	inf	0	1	1
gene2205	PA2166	0	0	0	0	1	1
gene2206	PA2167	0	0.421227	inf	0	1	1
gene2207	PA2168	0	0	0	0	1	1
gene2208	PA2169	0	0	0	0	1	1
gene2209	PA2170	0	0	0	0	1	1
gene221	PA0220	0.263509	0.374084	0.505513	0	1	1
gene2210	PA2171	0	4.06195	inf	0	1	1
gene2211	PA2172	0	0.594365	inf	0	1	1
gene2212	PA2173	0	0	0	0	1	1
gene2213	PA2173a	0	0	0	0	1	1
gene2214	PA2174	0	1.74856	inf	0	1	1
gene2215	PA2175	0	0	0	0	1	1
gene2216	PA2176	0	0	0	0	1	1
gene2217	PA2177	0.303238	0.426215	0.491131	0	1	1
gene2218	PA2178	0.408348	0.337718	-0.273981	0	1	1
gene2219	PA2179	0.324015	0	-inf	0	1	1
gene222	PA0221	0.274651	0.589542	1.10199	0	1	1
gene2220	PA2180	0.209533	0	-inf	0	1	1
gene2221	PA2181	0	0	0	0	1	1
gene2222	PA2182	0	1.32576	inf	0	1	1
gene2223	PA2183	0	0	0	0	1	1
gene2224	PA2184	0	1.79942	inf	0	1	1
gene2225	katN	0	0	0	0	1	1
gene2226	PA2187	4.95039	17.0601	1.78501	1.51323	0.1512	0.315525
gene2227	PA2188	0	0.231616	inf	0	1	1
gene2228	PA2189	0.875522	0	-inf	0	1	1
gene2229	PA2190	1.41848	6.96954	2.29671	0.834711	0.3004	0.470157
gene223	PA0222	0	0	0	0	1	1
gene2230	exoY	2.44802	2.68254	0.131989	0	1	1
gene2231	PA2192	0	0.947662	inf	0	1	1
gene2232	hcnA	0	0	0	0	1	1
gene2233	hcnB	2.80295	0.241746	-3.53538	0	1	1
gene2234	hcnC	0.644005	0	-inf	0	1	1
gene2235	PA2196	0.811422	1.74338	1.10336	0	1	1
gene2236	PA2197	0	0	0	0	1	1
gene2237	PA2198	1.41848	9.43911	2.7343	1.03064	0.0962	0.241777
gene2238	PA2199	1.23042	1.53756	0.321483	0	1	1
gene2239	PA2200	0.177325	0	-inf	0	1	1
gene224	PA0223	0.825279	4.6997	2.50961	0	1	1
gene2240	PA2201	0	0	0	0	1	1
gene2241	PA2202	0	0	0	0	1	1
gene2242	PA2203	0	0	0	0	1	1
gene2243	PA2204	2.82653	0.746217	-1.92137	0	1	1
gene2244	PA2205	0.575775	0	-inf	0	1	1
gene2245	PA2206	0.558603	0.297095	-0.910898	0	1	1
gene2246	PA2207	0	0.109589	inf	0	1	1
gene2247	PA2208	0	1.36522	inf	0	1	1
gene2248	PA2209	1.2866	1.13625	-0.179283	0	1	1
gene2249	PA2210	0.376653	0	-inf	0	1	1
gene225	PA0224	0	0	0	0	1	1
gene2250	PA2211	0	0	0	0	1	1
gene2251	PA2212	0.299792	0.287961	-0.0580847	0	1	1
gene2252	PA2213	0	0.136994	inf	0	1	1
gene2253	PA2214	0	0	0	0	1	1
gene2254	PA2215	0.502905	0.470666	-0.0955823	0	1	1
gene2255	PA2216	0	0.294313	inf	0	1	1
gene2256	PA2217	0	0.104702	inf	0	1	1
gene2257	PA2218	0	0.247295	inf	0	1	1
gene2258	opdE	0	0.142539	inf	0	1	1
gene2259	PA2220	0.241586	3.84575	3.99265	0	1	1
gene226	PA0225	0.481667	1.86685	1.9545	0	1	1
gene2260	PA2221	0	2.37718	inf	0	1	1
gene2261	PA2222	0	1.27977	inf	0	1	1
gene2262	PA2223	1.24835	3.21397	1.36433	0	1	1
gene2263	PA2224	6.42561	9.10677	0.503105	0.557986	0.3139	0.480035
gene2264	PA2225	0	0	0	0	1	1
gene2265	PA2226	0.535928	1.19249	1.15386	0	1	1
gene2266	vqsM	5.25511	7.8787	0.584238	0.719634	0.22735	0.393768
gene2267	PA2228	1.39815	3.82377	1.45148	0	1	1
gene2268	PA2229	0	0.539132	inf	0	1	1
gene2269	PA2230	0	0	0	0	1	1
gene227	PA0226	1.76413	1.25291	-0.493676	0	1	1
gene2270	pslA	2.72731	4.17001	0.612571	0	1	1
gene2271	pslB	0.538507	0.29206	-0.882699	0	1	1
gene2272	pslC	0.6951	0.199693	-1.79944	0	1	1
gene2273	pslD	0.601274	1.01681	0.757953	0	1	1
gene2274	pslE	6.65557	11.4475	0.782403	1.28541	0.02705	0.097934
gene2275	pslF	0.179002	1.51209	3.0785	0	1	1
gene2276	pslG	0.629844	0.754836	0.26117	0	1	1
gene2277	pslH	0	0.364762	inf	0	1	1
gene2278	pslI	0	0	0	0	1	1
gene2279	pslJ	0.343772	0.373194	0.118471	0	1	1
gene228	PA0227	0.413003	0.619308	0.584505	0	1	1
gene2280	pslK	0	0.597047	inf	0	1	1
gene2281	pslL	1.91473	0.936689	-1.0315	0	1	1
gene2282	pslM	0	0.249204	inf	0	1	1
gene2283	pslN	0	0.178058	inf	0	1	1
gene2284	bkdR	0.603792	0	-inf	0	1	1
gene2285	bkdA1	1.06616	1.37547	0.367507	0	1	1
gene2286	bkdA2	0.492513	0.704489	0.516415	0	1	1
gene2287	bkdB	0.625034	0.423612	-0.56119	0	1	1
gene2288	lpdV	0	0.551008	inf	0	1	1
gene2289	PA2251	0	0.813186	inf	0	1	1
gene229	pcaF	0	0	0	0	1	1
gene2290	PA2252	0.825877	1.72313	1.06104	0	1	1
gene2291	ansA	0	0	0	0	1	1
gene2292	pvcA	0	0	0	0	1	1
gene2293	pvcB	0	0	0	0	1	1
gene2294	pvcC	0	0	0	0	1	1
gene2295	pvcD	0	0	0	0	1	1
gene2296	ptxR	0	0	0	0	1	1
gene2297	ptxS	0.604633	0.284887	-1.08567	0	1	1
gene2298	PA2260	0	0	0	0	1	1
gene2299	PA2261	0	0	0	0	1	1
gene23	hemF	4.39206	5.95529	0.439274	0	1	1
gene230	pcaT	0	0.34579	inf	0	1	1
gene2300	PA2262	0	0.34304	inf	0	1	1
gene2301	PA2263	0	0	0	0	1	1
gene2302	PA2264	0	0.447183	inf	0	1	1
gene2303	PA2265	1.27199	1.41087	0.149487	0	1	1
gene2304	PA2266	0.289788	0	-inf	0	1	1
gene2305	PA2267	0.46002	0.334943	-0.457778	0	1	1
gene2306	PA2268	0	0	0	0	1	1
gene2307	PA2269	0.17593	0.285904	0.700533	0	1	1
gene2308	PA2270	0	0.583754	inf	0	1	1
gene2309	PA2271	0	0.712681	inf	0	1	1
gene231	pcaB	0	0.200141	inf	0	1	1
gene2310	pbpC	0	0.908986	inf	0	1	1
gene2311	soxR	0	1.59094	inf	0	1	1
gene2312	PA2274	0	0	0	0	1	1
gene2313	PA2275	0	0	0	0	1	1
gene2314	PA2276	0.502929	0.526212	0.0652884	0	1	1
gene2315	arsR	0	0	0	0	1	1
gene2316	arsB	0	0.132931	inf	0	1	1
gene2317	arsC	0	0.770085	inf	0	1	1
gene2318	PA2280	0	0.283506	inf	0	1	1
gene2319	PA2281	0	0.55397	inf	0	1	1
gene232	pcaD	0	1.4997	inf	0	1	1
gene2320	PA2282	0	0	0	0	1	1
gene2321	PA2283	0	0.17915	inf	0	1	1
gene2322	PA2284	0	0	0	0	1	1
gene2323	PA2285	0.364823	0.300771	-0.278533	0	1	1
gene2324	PA2286	0	0.283625	inf	0	1	1
gene2325	PA2287	0.385368	0	-inf	0	1	1
gene2326	PA2288	0	0	0	0	1	1
gene2327	PA2289	1.51266	1.65451	0.129315	0	1	1
gene2328	gcd	0.767388	0.582067	-0.39877	0	1	1
gene2329	PA2291	0.826829	0.531949	-0.636301	0	1	1
gene233	pcaC	2.208	1.62744	-0.440138	0	1	1
gene2330	PA2292	0	0	0	0	1	1
gene2331	PA2293	0	0	0	0	1	1
gene2332	PA2294	0	0	0	0	1	1
gene2333	PA2295	0.287967	0.368437	0.355514	0	1	1
gene2334	PA2296	0	0.195738	inf	0	1	1
gene2335	PA2297	0	0	0	0	1	1
gene2336	PA2298	0.611949	0.684576	0.1618	0	1	1
gene2337	PA2299	3.63794	7.5683	1.05685	0.922944	0.1567	0.319243
gene2338	chiC	0	0.599791	inf	0	1	1
gene2339	PA2301	0	0	0	0	1	1
gene234	PA0233	0.655597	0.598828	-0.130668	0	1	1
gene2340	ambE	0.166233	0.160677	-0.0490423	0	1	1
gene2341	ambD	0.641585	0.285905	-1.16611	0	1	1
gene2342	ambC	0.275291	0	-inf	0	1	1
gene2343	ambB	0	0.0672786	inf	0	1	1
gene2344	ambA	0.565341	0	-inf	0	1	1
gene2345	PA2307	0	0.21261	inf	0	1	1
gene2346	PA2308	0	0	0	0	1	1
gene2347	PA2309	0	0.27087	inf	0	1	1
gene2348	PA2310	0	0	0	0	1	1
gene2349	PA2311	0	0	0	0	1	1
gene235	PA0234	0.653866	2.19875	1.74962	0	1	1
gene2350	PA2312	0	0.359782	inf	0	1	1
gene2351	PA2312a	1.54232	1.87601	0.282562	0	1	1
gene2352	PA2314	0.233337	0.136615	-0.772307	0	1	1
gene2353	PA2315	0	0.376757	inf	0	1	1
gene2354	PA2316	1.04871	0.336351	-1.64058	0	1	1
gene2355	PA2317	0.904863	1.79207	0.985857	0	1	1
gene2356	PA2318	0	0	0	0	1	1
gene2357	PA2319	0	0	0	0	1	1
gene2358	gntR	0	0.171852	inf	0	1	1
gene2359	PA2321	0.505291	0	-inf	0	1	1
gene236	pcaK	0	0.2058	inf	0	1	1
gene2360	PA2322	0	0.525013	inf	0	1	1
gene2361	PA2323	0.772241	0.369453	-1.06366	0	1	1
gene2362	PA2324	0	0	0	0	1	1
gene2363	PA2325	0	0	0	0	1	1
gene2364	PA2326	0.203951	0.372207	0.867882	0	1	1
gene2365	PA2327	0	0.410506	inf	0	1	1
gene2366	PA2328	0	0	0	0	1	1
gene2367	PA2329	0	0.365527	inf	0	1	1
gene2368	PA2330	0	0	0	0	1	1
gene2369	PA2331	0	0	0	0	1	1
gene237	PA0236	0	0	0	0	1	1
gene2370	PA2332	0	0.644918	inf	0	1	1
gene2371	PA2333	0	0.167135	inf	0	1	1
gene2372	PA2334	0	0.527774	inf	0	1	1
gene2373	PA2335	0	0	0	0	1	1
gene2374	PA2336	0	0.197101	inf	0	1	1
gene2375	mtlR	0	0	0	0	1	1
gene2376	PA2338	0.221668	2.06985	3.22306	0	1	1
gene2377	PA2339	1.24549	1.20446	-0.0483254	0	1	1
gene2378	PA2340	0	1.85868	inf	0	1	1
gene2379	PA2341	0	0	0	0	1	1
gene238	PA0237	0	0.169489	inf	0	1	1
gene2380	mtlD	0	0.176675	inf	0	1	1
gene2381	mtlY	0	0	0	0	1	1
gene2382	mtlZ	0	0	0	0	1	1
gene2383	PA2345	0	0	0	0	1	1
gene2384	PA2346	0	0	0	0	1	1
gene2385	PA2347	0	0	0	0	1	1
gene2386	PA2348	0	0	0	0	1	1
gene2387	PA2349	0	0.627639	inf	0	1	1
gene2388	PA2350	0	1.15294	inf	0	1	1
gene2389	PA2351	0.371425	0.506506	0.447509	0	1	1
gene239	PA0238	0	0.229429	inf	0	1	1
gene2390	PA2352	0	0	0	0	1	1
gene2391	PA2353	0.441744	0.150364	-1.55475	0	1	1
gene2392	PA2354	0.263243	0.54857	1.05928	0	1	1
gene2393	PA2355	0	0	0	0	1	1
gene2394	msuD	0	0	0	0	1	1
gene2395	msuE	0	0	0	0	1	1
gene2396	PA2358	0	0	0	0	1	1
gene2397	PA2359	1.94303	1.6621	-0.225296	0	1	1
gene2398	PA2360	0	0	0	0	1	1
gene2399	PA2361	0.191879	1.02642	2.41935	0	1	1
gene24	aroE	0.511127	0.22627	-1.17563	0	1	1
gene240	PA0239	0.471814	2.33528	2.30731	0	1	1
gene2400	PA2362	0	0	0	0	1	1
gene2401	PA2363	0.573556	0	-inf	0	1	1
gene2402	PA2364	0	0	0	0	1	1
gene2403	PA2365	0	0	0	0	1	1
gene2404	PA2366	0.748146	0.719004	-0.0573201	0	1	1
gene2405	PA2367	0.771251	2.12087	1.45938	0	1	1
gene2406	PA2368	0	0	0	0	1	1
gene2407	PA2369	0.112724	0.381968	1.76065	0	1	1
gene2408	PA2370	0	0	0	0	1	1
gene2409	PA2371	0	0	0	0	1	1
gene241	PA0240	0	0	0	0	1	1
gene2410	PA2373	0.0997434	0.543635	2.44635	0	1	1
gene2411	PA2374	0	0	0	0	1	1
gene2412	PA2375	0	0	0	0	1	1
gene2413	PA2376	0	0	0	0	1	1
gene2414	PA2377	0	0.846059	inf	0	1	1
gene2415	PA2378	1.05337	0.853509	-0.303528	0	1	1
gene2416	PA2379	0	0.490804	inf	0	1	1
gene2417	PA2380	0	3.17105	inf	0	1	1
gene2418	PA2381	2.96575	0	-inf	0	1	1
gene2419	lldA	0.679434	0.150824	-2.17147	0	1	1
gene242	PA0241	0.218788	0.675335	1.62607	0	1	1
gene2420	PA2383	0.241586	0	-inf	0	1	1
gene2421	PA2384	0	0	0	0	1	1
gene2422	pvdQ	0	0.178628	inf	0	1	1
gene2423	pvdA	0.688833	1.04428	0.600283	0	1	1
gene2424	fpvI	0	3.674	inf	0	1	1
gene2425	fpvR	0	0.179353	inf	0	1	1
gene2426	pvdR	0	0	0	0	1	1
gene2427	pvdT	0	0.379642	inf	0	1	1
gene2428	opmQ	0	0	0	0	1	1
gene2429	pvdP	0.227183	0.157456	-0.52891	0	1	1
gene243	PA0242	0	0.544276	inf	0	1	1
gene2430	PA2393	0	0.392187	inf	0	1	1
gene2431	pvdN	0	0.473079	inf	0	1	1
gene2432	pvdO	0	0	0	0	1	1
gene2433	pvdF	0	0	0	0	1	1
gene2434	pvdE	0.170849	1.34621	2.97811	0	1	1
gene2435	fpvA	3.32359	3.7102	0.158754	0	1	1
gene2436	pvdD	0.203142	0.717991	1.82148	0	1	1
gene2437	pvdJ	0.0292073	0.805056	4.78469	0	1	1
gene2438	PA2402	0.159806	0.377595	1.24052	0	1	1
gene2439	PA2403	0.562779	1.18172	1.07024	0	1	1
gene244	PA0243	0	1.27918	inf	0	1	1
gene2440	PA2404	2.81347	0.40037	-2.81294	0	1	1
gene2441	PA2405	0	0	0	0	1	1
gene2442	PA2406	0	0	0	0	1	1
gene2443	PA2407	0	0	0	0	1	1
gene2444	PA2408	0	0	0	0	1	1
gene2445	PA2409	0	0.628252	inf	0	1	1
gene2446	PA2410	0.785319	0.523503	-0.585081	0	1	1
gene2447	PA2411	0	0.659643	inf	0	1	1
gene2448	PA2412	0	0	0	0	1	1
gene2449	pvdH	0	0.19526	inf	0	1	1
gene245	PA0244	0	0	0	0	1	1
gene2450	PA2414	0.378611	2.49008	2.7174	0	1	1
gene2451	PA2415	0	0	0	0	1	1
gene2452	treA	0.226717	0.329456	0.539195	0	1	1
gene2453	PA2417	0.869334	1.00234	0.205388	0	1	1
gene2454	PA2418	0	0.352647	inf	0	1	1
gene2455	PA2419	1.15276	2.64767	1.19963	0	1	1
gene2456	PA2420	0	0.31239	inf	0	1	1
gene2457	PA2421	0.33698	0	-inf	0	1	1
gene2458	PA2422	0	1.5546	inf	0	1	1
gene2459	PA2423	0	0	0	0	1	1
gene246	aroQ2	0	0	0	0	1	1
gene2460	pvdL	0.0339818	0.0905912	1.41461	0	1	1
gene2461	pvdG	0	0.249137	inf	0	1	1
gene2462	pvdS	1.09607	0.624505	-0.811558	0	1	1
gene2463	PA2427	0	0	0	0	1	1
gene2464	PA2428	0	0.52563	inf	0	1	1
gene2465	PA2429	0	0	0	0	1	1
gene2466	PA2430	0.303028	0	-inf	0	1	1
gene2467	PA2431	0.165785	0	-inf	0	1	1
gene2468	bexR	0.243499	0.198888	-0.291963	0	1	1
gene2469	PA2433	0	2.33462	inf	0	1	1
gene247	PA0246	0.704641	0.686285	-0.038082	0	1	1
gene2470	PA2434	0	0	0	0	1	1
gene2471	PA2435	0.139216	0.289982	1.05864	0	1	1
gene2472	PA2436	1.61359	1.74742	0.114947	0	1	1
gene2473	PA2437	0	0	0	0	1	1
gene2474	PA2438	0	0	0	0	1	1
gene2475	PA2439	0	0	0	0	1	1
gene2476	PA2440	0	0	0	0	1	1
gene2477	PA2441	0	0.209895	inf	0	1	1
gene2478	gcvT2	0.350501	0.254951	-0.4592	0	1	1
gene2479	sdaA	0.695091	0.514527	-0.433957	0	1	1
gene248	pobA	0	0.384884	inf	0	1	1
gene2480	glyA2	0	0	0	0	1	1
gene2481	gcvP2	0.499389	0	-inf	0	1	1
gene2482	gcvH2	0	0	0	0	1	1
gene2483	PA2447	0	0	0	0	1	1
gene2484	PA2448	0	0.153663	inf	0	1	1
gene2485	PA2449	1.5029	1.6487	0.133582	0	1	1
gene2486	PA2450	0	0.325414	inf	0	1	1
gene2488	PA2453	3.71715	9.83527	1.40377	0	1	1
gene2489	PA2454	1.61809	0.773711	-1.06442	0	1	1
gene249	PA0248	0.259969	0.42522	0.709872	0	1	1
gene2490	PA2455	0	0	0	0	1	1
gene2491	PA2457	7.71174	5.13789	-0.58588	-0.694791	0.21235	0.380812
gene2492	PA2458	0	0.155583	inf	0	1	1
gene2493	PA2459	29.9387	18.3153	-0.708962	-1.10254	0.0573	0.164416
gene2494	PA2460	65.5053	57.4749	-0.188679	-0.277387	0.6268	0.750412
gene2495	PA2461	31.065	22.6205	-0.457656	-0.639039	0.26175	0.429871
gene2496	PA2462	3.47853	1.19951	-1.53604	0	1	1
gene2497	PA2463	1.92913	0.722486	-1.41691	0	1	1
gene2498	PA2464	0	0	0	0	1	1
gene2499	PA2465	0	0.235889	inf	0	1	1
gene25	plcB	1.75882	1.05938	-0.731392	0	1	1
gene250	PA0249	0	0	0	0	1	1
gene2500	foxA	0.190256	0.43532	1.19414	0	1	1
gene2501	foxR	0	0	0	0	1	1
gene2502	foxI	0	0	0	0	1	1
gene2503	PA2469	0.486998	0.52563	0.11013	0	1	1
gene2504	gtdA	0.374261	0.166063	-1.17231	0	1	1
gene2505	PA2471	0	0	0	0	1	1
gene2506	PA2472	0	0.125808	inf	0	1	1
gene2507	PA2473	0	0	0	0	1	1
gene2508	PA2474	0	0.511268	inf	0	1	1
gene2509	PA2475	0	0.127105	inf	0	1	1
gene251	PA0250	1.27678	0.873709	-0.54728	0	1	1
gene2510	dsbG	0.978854	1.58284	0.693352	0	1	1
gene2511	PA2477	0	0.346786	inf	0	1	1
gene2512	PA2478	0	0.092869	inf	0	1	1
gene2513	PA2479	0	0	0	0	1	1
gene2514	PA2480	0	0	0	0	1	1
gene2515	PA2481	0.256713	0.655075	1.3515	0	1	1
gene2516	PA2482	1.96046	1.7042	-0.202104	0	1	1
gene2517	PA2483	0.401478	2.76361	2.78316	0	1	1
gene2518	PA2484	0	0.520885	inf	0	1	1
gene2519	PA2485	0	1.23868	inf	0	1	1
gene252	PA0251	0	0.314149	inf	0	1	1
gene2520	PA2486	0	14.7402	inf	-nan	0.00145	0.0119377
gene2521	PA2487	0	0	0	0	1	1
gene2522	PA2488	0	1.15792	inf	0	1	1
gene2523	PA2489	0	0.755187	inf	0	1	1
gene2524	PA2490	0	0	0	0	1	1
gene2525	PA2491	2.66433	1.38056	-0.948519	0	1	1
gene2526	mexT	0.382031	0	-inf	0	1	1
gene2527	mexE	0	0.225509	inf	0	1	1
gene2528	mexF	0.12171	0.174347	0.518511	0	1	1
gene2529	oprN	0	0.184759	inf	0	1	1
gene253	PA0252	0	0	0	0	1	1
gene2530	PA2496	0	0.670242	inf	0	1	1
gene2531	PA2497	0	0	0	0	1	1
gene2532	PA2498	0	0	0	0	1	1
gene2533	PA2499	0.883135	0.864408	-0.0309218	0	1	1
gene2534	PA2500	0.344952	0.498643	0.531614	0	1	1
gene2535	PA2501	0	0	0	0	1	1
gene2536	PA2502	0	0.805235	inf	0	1	1
gene2537	PA2503	0.16823	0.136615	-0.30032	0	1	1
gene2538	PA2504	0	0	0	0	1	1
gene2539	opdT	0	0.196093	inf	0	1	1
gene254	PA0253	0	0	0	0	1	1
gene2540	PA2506	0	0	0	0	1	1
gene2541	catA	0	0	0	0	1	1
gene2542	catC	0	0	0	0	1	1
gene2543	catB	0.191249	0	-inf	0	1	1
gene2544	catR	0	0	0	0	1	1
gene2545	PA2511	0	0	0	0	1	1
gene2546	antA	0.206451	0.309262	0.583027	0	1	1
gene2547	antB	1.57099	34.3088	4.44883	2.91861	0.1328	0.295603
gene2548	antC	0.391513	0.284887	-0.458668	0	1	1
gene2549	xylL	0	0	0	0	1	1
gene255	PA0254	0	0	0	0	1	1
gene2550	xylZ	0	0.175522	inf	0	1	1
gene2551	xylY	0	0	0	0	1	1
gene2552	xylX	0.363498	3.45271	3.24771	0	1	1
gene2553	xylS	0	0.188256	inf	0	1	1
gene2554	czcA	0	0.365293	inf	0	1	1
gene2555	czcB	0.142172	0.115224	-0.303201	0	1	1
gene2556	czcC	0	0	0	0	1	1
gene2557	PA2523	0	0.293622	inf	0	1	1
gene2558	PA2524	0.40496	0.193842	-1.0629	0	1	1
gene2559	PA2525	0.27543	0.182363	-0.594873	0	1	1
gene256	PA0255	0	0.734832	inf	0	1	1
gene2560	PA2526	0.171878	0.497414	1.53306	0	1	1
gene2561	PA2527	0.209372	0.608772	1.53984	0	1	1
gene2562	PA2528	0.464212	0.985118	1.08551	0	1	1
gene2563	PA2529	0	0.799888	inf	0	1	1
gene2564	PA2530	0	0	0	0	1	1
gene2565	PA2531	0	0	0	0	1	1
gene2566	tpx	0	0.752407	inf	0	1	1
gene2567	PA2533	2.06784	1.02831	-1.00786	0	1	1
gene2568	PA2534	0	0.199693	inf	0	1	1
gene2569	PA2535	0.219982	0.27976	0.346806	0	1	1
gene257	PA0256	1.57716	2.44824	0.634421	0	1	1
gene2570	PA2536	0.673317	0.921206	0.452238	0	1	1
gene2571	PA2537	1.12129	0.826166	-0.440663	0	1	1
gene2572	PA2538	0	0.873669	inf	0	1	1
gene2573	PA2539	0	0.331208	inf	0	1	1
gene2574	PA2540	0.857426	0.431046	-0.99217	0	1	1
gene2575	PA2541	0.543515	0	-inf	0	1	1
gene2576	PA2542	0.157746	0.261768	0.730689	0	1	1
gene2577	PA2543	0.11657	0.0942898	-0.306027	0	1	1
gene2578	PA2544	0	0.425673	inf	0	1	1
gene2579	xthA	0	0	0	0	1	1
gene258	PA0257	1.10472	2.96735	1.4255	0	1	1
gene2580	PA2546	0	0	0	0	1	1
gene2581	PA2547	0	0	0	0	1	1
gene2582	PA2548	0.149064	0.386059	1.37289	0	1	1
gene2583	PA2549	0.289486	0.711789	1.29796	0	1	1
gene2584	PA2550	0.314555	0.217806	-0.530266	0	1	1
gene2585	PA2551	0	0.582563	inf	0	1	1
gene2586	PA2552	0	0.395685	inf	0	1	1
gene2587	PA2553	0	0.145055	inf	0	1	1
gene2588	PA2554	0	0	0	0	1	1
gene2589	PA2555	0.735231	0.970923	0.401158	0	1	1
gene259	PA0258	0	0	0	0	1	1
gene2590	PA2556	0	0.426786	inf	0	1	1
gene2591	PA2557	0.458168	0.669742	0.547729	0	1	1
gene2592	PA2558	0	0	0	0	1	1
gene2593	PA2559	6.94017	6.90281	-0.00778721	0	1	1
gene2594	PA2559a	0	0	0	0	1	1
gene2595	PA2560	11.782	0	-inf	-nan	0.00015	0.001803
gene2596	PA2561	0	0	0	0	1	1
gene2597	PA2562	0	0	0	0	1	1
gene2598	PA2563	0.522385	1.57499	1.59216	0	1	1
gene2599	PA2564	0.550172	0.370602	-0.57001	0	1	1
gene26	PA0027	0	0.206658	inf	0	1	1
gene260	PA0259	2.0056	1.95095	-0.0398631	0	1	1
gene2600	PA2565	0	0	0	0	1	1
gene2601	PA2566	0	0.145483	inf	0	1	1
gene2602	PA2567	2.17105	0.785301	-1.46707	0	1	1
gene2603	PA2568	1.78866	1.03977	-0.78262	0	1	1
gene2604	PA2569	23.3057	17.4155	-0.42031	-0.429264	0.4446	0.584407
gene2605	lecA	0	6.0821	inf	0	1	1
gene2606	PA2570.1	0	0	0	0	1	1
gene2607	PA2571	0.203459	1.30389	2.68002	0	1	1
gene2608	PA2572	0.21543	0.912514	2.08263	0	1	1
gene2609	PA2573	0.830552	1.4054	0.758843	0	1	1
gene261	PA0260	9.52026	7.62391	-0.32047	-0.571788	0.32445	0.488538
gene2610	alkB1	0.258397	0.955514	1.88669	0	1	1
gene2611	PA2575	5.5282	2.83644	-0.962729	0	1	1
gene2612	PA2576	0.458111	0	-inf	0	1	1
gene2613	PA2577	0	0	0	0	1	1
gene2614	PA2578	0	0	0	0	1	1
gene2615	kynA	0.363137	1.24353	1.77586	0	1	1
gene2616	PA2580	0	0.55069	inf	0	1	1
gene2617	PA2581	9.50978	0.993189	-3.25927	-1.78613	0.018	0.072604
gene2618	PA2581.1	0	0	0	0	1	1
gene2619	PA2582	0.92672	4.21588	2.18563	0	1	1
gene262	PA0261	2.57219	0.752407	-1.77341	0	1	1
gene2620	PA2583	1.17276	1.29756	0.145883	0	1	1
gene2621	PA2583.1	0	0	0	0	1	1
gene2622	pgsA	12.2261	28.4189	1.21689	1.6504	0.01045	0.049066
gene2623	uvrC	1.45382	0.844659	-0.78341	0	1	1
gene2624	gacA	6.74877	21.7267	1.68678	2.04244	0.00395	0.0247286
gene2625	pqsH	0.971246	2.31016	1.25009	0	1	1
gene2626	PA2588	0	0.172453	inf	0	1	1
gene2627	PA2589	0.735589	0	-inf	0	1	1
gene2628	PA2590	0	0.245031	inf	0	1	1
gene2629	PA2591	1.90339	0.848367	-1.16581	0	1	1
gene263	PA0262	1.68292	0.96339	-0.804777	0	1	1
gene2630	PA2592	3.41113	1.33159	-1.35709	0	1	1
gene2631	qteE	0	0	0	0	1	1
gene2632	PA2594	1.72873	0.18754	-3.20444	0	1	1
gene2633	PA2595	0	0.309083	inf	0	1	1
gene2634	PA2596	0.309715	0	-inf	0	1	1
gene2635	PA2597	0	0	0	0	1	1
gene2636	PA2598	0	0	0	0	1	1
gene2637	PA2599	0	0.787676	inf	0	1	1
gene2638	PA2600	0	0.257246	inf	0	1	1
gene2639	PA2601	0.46002	0	-inf	0	1	1
gene264	hcpC	0	0	0	0	1	1
gene2640	PA2602	0	0.531678	inf	0	1	1
gene2641	PA2603	0	0.171063	inf	0	1	1
gene2642	PA2603.1	0	0	0	0	1	1
gene2643	PA2604	0.36055	1.5496	2.10362	0	1	1
gene2644	PA2605	0	0	0	0	1	1
gene2645	PA2606	0	0	0	0	1	1
gene2646	PA2607	0	0	0	0	1	1
gene2647	PA2608	0	1.47985	inf	0	1	1
gene2648	PA2609	2.96889	2.36612	-0.327401	0	1	1
gene2649	PA2610	0	0.287089	inf	0	1	1
gene265	PA0263.1	0	0	0	0	1	1
gene2650	cysG	0.954448	1.73971	0.866107	0	1	1
gene2651	serS	0.82771	1.74174	1.07333	0	1	1
gene2652	PA2613	5.576	8.3643	0.585015	0.834716	0.1429	0.306489
gene2653	lolA	2.28664	4.27729	0.90347	0	1	1
gene2654	ftsK	3.10273	3.31321	0.0946925	0	1	1
gene2655	trxB1	21.5352	25.0904	0.220434	0.405599	0.47695	0.61059
gene2656	aat	0	0.290171	inf	0	1	1
gene2657	PA2618	2.67693	1.68766	-0.665552	0	1	1
gene2658	infA	0	0	0	0	1	1
gene2659	clpA	5.99776	6.13571	0.0328057	0	1	1
gene266	gabD	1.99159	0.912921	-1.12536	0	1	1
gene2660	PA2621	106.122	101.427	-0.0652916	-0.122565	0.8332	0.896823
gene2661	cspD	33.0392	19.0937	-0.79108	-0.684262	0.1648	0.326881
gene2662	icd	74.9396	49.9861	-0.584203	-1.20309	0.0375	0.127173
gene2663	idh	30.7055	21.0314	-0.545954	-1.1175	0.05185	0.153507
gene2664	PA2625	1.96269	0.490804	-1.99961	0	1	1
gene2665	trmU	1.77329	2.14529	0.274743	0	1	1
gene2666	PA2627	0	0	0	0	1	1
gene2667	PA2628	0	2.34452	inf	0	1	1
gene2668	purB	1.8798	3.84536	1.03254	0	1	1
gene2669	PA2630	2.74127	1.01231	-1.43719	0	1	1
gene267	PA0266	1.93978	1.43876	-0.431066	0	1	1
gene2670	PA2631	0	0	0	0	1	1
gene2671	PA2632	0.561583	0.657504	0.227501	0	1	1
gene2672	PA2633	1.41526	2.01219	0.507702	0	1	1
gene2673	aceA	17.8349	7.20472	-1.30769	-2.22915	0.00055	0.00541885
gene2674	PA2635	0.136729	0.415403	1.60319	0	1	1
gene2675	PA2636	0.657676	0.987211	0.585982	0	1	1
gene2676	nuoA	9.16896	22.6639	1.30556	1.25973	0.0398	0.130709
gene2677	nuoB	1.35144	2.46011	0.864233	0	1	1
gene2678	nuoD	4.75352	3.88502	-0.291076	0	1	1
gene2679	nuoE	1.30024	0.447001	-1.54043	0	1	1
gene268	PA0267	0.491172	0	-inf	0	1	1
gene2680	nuoF	1.76294	1.79861	0.0289046	0	1	1
gene2681	nuoG	1.444	1.0755	-0.42507	0	1	1
gene2682	nuoH	0.526317	1.96597	1.90124	0	1	1
gene2683	nuoI	0.668051	0	-inf	0	1	1
gene2684	nuoJ	0	0.745486	inf	0	1	1
gene2685	nuoK	0	0	0	0	1	1
gene2686	nuoL	1.03117	1.34111	0.379145	0	1	1
gene2687	nuoM	0.268808	0.557011	1.05113	0	1	1
gene2688	nuoN	0.791258	1.0037	0.343112	0	1	1
gene2689	PA2650	0.918781	1.18615	0.368497	0	1	1
gene269	PA0268	0.266048	0.184315	-0.529513	0	1	1
gene2690	PA2651	1.51391	1.31954	-0.198249	0	1	1
gene2691	PA2652	0.439011	0.568755	0.373549	0	1	1
gene2692	PA2653	0.218788	0	-inf	0	1	1
gene2693	PA2654	0.830769	0.600139	-0.46915	0	1	1
gene2694	PA2655	0	0	0	0	1	1
gene2695	PA2656	0.216538	1.3535	2.644	0	1	1
gene2696	PA2657	0.504522	0	-inf	0	1	1
gene2697	PA2658	0	0.975208	inf	0	1	1
gene2698	PA2659	2.93404	5.52096	0.912028	0	1	1
gene2699	PA2660	0.277103	0.253004	-0.131262	0	1	1
gene27	PA0028	0.413831	0.535375	0.371511	0	1	1
gene270	PA0269	0	0	0	0	1	1
gene2700	PA2661	0	0.336351	inf	0	1	1
gene2701	PA2662	0.247027	0.289259	0.227694	0	1	1
gene2702	ppyR	2.57714	2.37774	-0.116184	0	1	1
gene2703	fhp	0.869728	0.83086	-0.0659584	0	1	1
gene2704	PA2665	0.132094	0.738341	2.48272	0	1	1
gene2705	PA2666	0	1.54864	inf	0	1	1
gene2706	PA2667	0	2.35801	inf	0	1	1
gene2708	PA2669	0	0.558679	inf	0	1	1
gene2709	PA2670	0	0.478927	inf	0	1	1
gene271	PA0270	0	0	0	0	1	1
gene2710	PA2671	0	0	0	0	1	1
gene2711	PA2672	0	0	0	0	1	1
gene2712	PA2673	0	0	0	0	1	1
gene2713	PA2674	1.04443	0	-inf	0	1	1
gene2714	PA2675	0.661656	0.555867	-0.25134	0	1	1
gene2715	PA2676	0	0.529225	inf	0	1	1
gene2716	PA2677	0	1.63873	inf	0	1	1
gene2717	PA2678	9.61798	9.31965	-0.0454571	-0.0568336	0.94255	0.963389
gene2718	PA2679	0	0.254277	inf	0	1	1
gene2719	PA2680	0	0.287089	inf	0	1	1
gene272	PA0271	0	0	0	0	1	1
gene2720	PA2681	0	0	0	0	1	1
gene2721	PA2682	0	0	0	0	1	1
gene2722	PA2683	2.11445	0.956561	-1.14435	0	1	1
gene2723	PA2684	0.806883	0.199954	-2.01269	0	1	1
gene2724	PA2685	13.6866	1.84111	-2.89412	-3.80312	5e-05	0.000698837
gene2725	pfeR	0	0.198089	inf	0	1	1
gene2726	pfeS	0.155865	0.450008	1.52966	0	1	1
gene2727	pfeA	0	0.227843	inf	0	1	1
gene2728	PA2689	0.339699	0	-inf	0	1	1
gene2729	PA2690	0	0	0	0	1	1
gene273	PA0272	0	0.621894	inf	0	1	1
gene2730	PA2691	0	0	0	0	1	1
gene2731	PA2692	0	1.76472	inf	0	1	1
gene2732	PA2693	1.07186	0.700565	-0.613521	0	1	1
gene2733	PA2694	0	0	0	0	1	1
gene2734	PA2695	0.194885	0.418502	1.10261	0	1	1
gene2735	PA2696	0	0	0	0	1	1
gene2736	PA2697	0	3.16345	inf	0	1	1
gene2737	PA2698	0	0.580343	inf	0	1	1
gene2738	PA2699	0	0.0886925	inf	0	1	1
gene2739	opdB	0	0.130125	inf	0	1	1
gene274	PA0273	0	0	0	0	1	1
gene2740	PA2701	0	0	0	0	1	1
gene2741	PA2702	0	0.481389	inf	0	1	1
gene2742	PA2703	6.27458	0	-inf	0	1	1
gene2743	PA2704	0	0	0	0	1	1
gene2744	PA2705	0.24996	0.707543	1.50112	0	1	1
gene2745	PA2706	0	0	0	0	1	1
gene2746	PA2707	9.5145	3.79232	-1.32705	-1.29155	0.0591	0.165205
gene2747	PA2708	0	0.413878	inf	0	1	1
gene2748	cysK	3.28015	1.73047	-0.9226	0	1	1
gene2749	PA2710	0	0	0	0	1	1
gene275	PA0274	0	0	0	0	1	1
gene2750	PA2711	0.548788	0.777197	0.502033	0	1	1
gene2751	PA2712	0	1.44462	inf	0	1	1
gene2752	PA2713	0	0	0	0	1	1
gene2753	PA2714	0.118125	0	-inf	0	1	1
gene2754	PA2715	0	1.34906	inf	0	1	1
gene2755	PA2716	0	0.138924	inf	0	1	1
gene2756	cpo	0.382953	0.368895	-0.0539577	0	1	1
gene2757	PA2718	0	0.72684	inf	0	1	1
gene2758	PA2719	0	1.23403	inf	0	1	1
gene2759	PA2720	5.07659	7.69531	0.600118	0.511146	0.34565	0.498527
gene276	PA0275	0.348307	0.448032	0.363242	0	1	1
gene2760	PA2721	0	0	0	0	1	1
gene2761	PA2722	0	0	0	0	1	1
gene2762	PA2723	0	0	0	0	1	1
gene2763	PA2724	0.911499	0	-inf	0	1	1
gene2764	PA2725	1.49859	0.669109	-1.16329	0	1	1
gene2765	PA2726	0	0	0	0	1	1
gene2767	PA2729	1.53573	0.205273	-2.90331	0	1	1
gene2768	PA2730	9.20988	6.701	-0.458807	-0.60349	0.30335	0.472534
gene2769	PA2732	7.08737	13.4985	0.929472	1.2919	0.0283	0.10124
gene277	PA0276	0.731418	0	-inf	0	1	1
gene2770	PA2733	69.9463	93.543	0.419381	0.560483	0.3317	0.489837
gene2771	PA2734	39.0375	30.5433	-0.354006	-0.70899	0.2116	0.380753
gene2772	PA2735	30.8456	66.7609	1.11394	2.22459	0.0002	0.00231154
gene2773	PA2736	1.35307	0.786004	-0.783629	0	1	1
gene2774	PA2736.1	0	0	0	0	1	1
gene2775	PA2737	9.0299	9.95817	0.141172	0.0896638	0.888	0.934655
gene2776	himA	25.818	38.0278	0.558678	0.61305	0.29055	0.461959
gene2777	pheT	0.597029	1.74551	1.54777	0	1	1
gene2778	pheS	0.394309	1.94521	2.30253	0	1	1
gene2779	rplT	12.1526	18.5972	0.613823	0.517225	0.33995	0.494664
gene278	PA0277	12.4961	0.896334	-3.80129	-2.11014	0.2395	0.407761
gene2780	rpmI	125.42	96.5917	-0.376799	-0.470596	0.4404	0.583234
gene2781	infC	199.23	247.051	0.310376	0.537746	0.357	0.509637
gene2782	thrS	17.8688	14.8556	-0.266439	-0.253742	0.65835	0.774257
gene2783	PA2744.1	0	0	0	0	1	1
gene2784	PA2745	0	0.213531	inf	0	1	1
gene2785	PA2746	2.14256	0	-inf	0	1	1
gene2786	PA2746a	0	0	0	0	1	1
gene2787	PA2747	2.80218	0	-inf	0	1	1
gene2788	PA2747a	0	0	0	0	1	1
gene2789	PA2748	0	0	0	0	1	1
gene279	PA0278	0	0	0	0	1	1
gene2790	endA	0	0	0	0	1	1
gene2791	PA2750	0.725173	0	-inf	0	1	1
gene2792	PA2750a	2.15404	3.37687	0.648642	0	1	1
gene2793	PA2751	0.458111	1.05623	1.20516	0	1	1
gene2794	PA2752	0	0	0	0	1	1
gene2795	PA2753	0.838999	1.1226	0.420106	0	1	1
gene2796	PA2754	4.62602	3.73285	-0.309496	0	1	1
gene2797	PA2754a	0	0	0	0	1	1
gene2798	PA2755a	0	0	0	0	1	1
gene2799	eco	31.7758	3.88421	-3.03224	-2.02845	0.05745	0.164416
gene28	PA0029	0	0	0	0	1	1
gene280	PA0279	0	0	0	0	1	1
gene2800	PA2756	1.27678	2.60119	1.02666	0	1	1
gene2801	PA2757	0.641191	0	-inf	0	1	1
gene2802	PA2758	0	0.867619	inf	0	1	1
gene2803	PA2759	0	0	0	0	1	1
[truncated: 3,679 more rows]

## Sheet: Significant
Gene ID	Gene Name	Value 1	Value 2	log2 (fold change)	Test Statistics	p value	q value	significant
gene100	PA0099	29.7865	4.74403	-2.65048	-3.77489	5e-05	0.000698837	yes
gene1004	pyoS5	52.8453	17.5083	-1.59374	-3.17122	5e-05	0.000698837	yes
gene1075	PA1053	41.8306	93.3374	1.15789	2.02782	0.00105	0.00970846	yes
gene1091	PA1069	7.53594	1.91221	-1.97854	-2.60782	0.00025	0.00268304	yes
gene1116	fliD	13.5333	6.6493	-1.02524	-1.65814	0.0066	0.0357351	yes
gene1117	PA1095	129.204	7.21324	-4.16286	-3.14279	0.00265	0.0191886	yes
gene1119	fleQ	4.1866	10.8754	1.37722	2.0293	0.00275	0.0196756	yes
gene1175	pys2	96.6484	53.9177	-0.841987	-1.70527	0.0024	0.0178074	yes
gene1176	imm2	134.36	56.4069	-1.25216	-1.83929	0.0038	0.0247286	yes
gene1179	nrdB	63.8121	34.8794	-0.871454	-1.77239	0.0023	0.0172787	yes
gene1202	oprH	40.6783	99.4149	1.2892	2.48325	5e-05	0.000698837	yes
gene1394	PA1369	104.664	30.1285	-1.79656	-3.47606	5e-05	0.000698837	yes
gene1439	PA1414	8.59171	47.2851	2.46037	2.24087	0.00385	0.0247286	yes
gene1456	rsaL	627.92	209.122	-1.58624	-2.86187	5e-05	0.000698837	yes
gene1457	lasI	62.0684	27.0521	-1.19812	-2.10094	0.0005	0.00500833	yes
gene1535	PA1509	22.776	9.92586	-1.19825	-1.80905	0.00295	0.0206157	yes
gene1554	zipA	24.8322	45.7464	0.881446	1.65677	0.0039	0.0247286	yes
gene1560	PA1533	104.495	42.4434	-1.29983	-2.00187	0.00245	0.0179567	yes
gene1583	ccoP2	16.7355	5.37344	-1.63899	-2.09732	0.0037	0.0247078	yes
gene1586	ccoN2	14.3183	4.55088	-1.65364	-2.45509	0.00045	0.0045839	yes
gene1613	sdhB	252.039	134.811	-0.902714	-1.85065	0.00135	0.0114275	yes
gene1625	htpG	8.62707	61.2625	2.82806	5.19305	5e-05	0.000698837	yes
gene1686	PA1656	19.5494	2.11828	-3.20616	-3.53665	0.0001	0.00130652	yes
gene1688	PA1658	22.6564	0.992143	-4.51323	-4.66897	0.0091	0.0463781	yes
gene1784	cysB	63.673	13.7047	-2.21601	-3.32536	5e-05	0.000698837	yes
gene1803	cmaX	3.33028	10.2239	1.61823	1.72921	0.00745	0.0385256	yes
gene1838	clpX	55.3485	145.186	1.39129	2.83085	5e-05	0.000698837	yes
gene1839	lon	32.829	101.139	1.6233	3.26832	5e-05	0.000698837	yes
gene1976	PA1939	8.32965	4.10377	-1.0213	-1.59073	0.0075	0.0385256	yes
gene2520	PA2486	0	14.7402	inf	-nan	0.00145	0.0119377	yes
gene2595	PA2560	11.782	0	-inf	-nan	0.00015	0.001803	yes
gene2622	pgsA	12.2261	28.4189	1.21689	1.6504	0.01045	0.049066	yes
gene2624	gacA	6.74877	21.7267	1.68678	2.04244	0.00395	0.0247286	yes
gene2673	aceA	17.8349	7.20472	-1.30769	-2.22915	0.00055	0.00541885	yes
gene2724	PA2685	13.6866	1.84111	-2.89412	-3.80312	5e-05	0.000698837	yes
gene2772	PA2735	30.8456	66.7609	1.11394	2.22459	0.0002	0.00231154	yes
gene2851	PA2805	7.48308	0	-inf	-nan	0.00135	0.0114275	yes
gene292	oprE	20.563	6.97732	-1.5593	-2.60418	5e-05	0.000698837	yes
gene3027	rne	24.3393	49.8051	1.03301	2.10105	0.00025	0.00268304	yes
gene3062	topA	8.7912	20.359	1.21153	2.36625	5e-05	0.000698837	yes
gene308	PA0306a	39.0824	15.5097	-1.33335	-1.82724	0.00395	0.0247286	yes
gene3101	rmf	78.8232	12.3991	-2.66838	-1.41941	0.0094	0.0451952	yes
gene3201	wbpM	21.5844	9.88673	-1.12643	-2.13953	0.00015	0.001803	yes
gene3216	PA3157	9.87412	26.4346	1.4207	2.17387	0.00065	0.00630081	yes
gene3389	PA3326	23.5314	8.74695	-1.42774	-1.8175	0.007	0.0372301	yes
gene3555	PA3488	72.136	8.88402	-3.02143	-5.06997	5e-05	0.000698837	yes
gene3598	bfrB	3320.52	1612.16	-1.04241	-2.13433	0.00035	0.00369035	yes
gene3692	PA3623	14.5214	3.13913	-2.20975	-2.07658	0.0063	0.0346941	yes
gene3722	frr	271.131	103.065	-1.39543	-2.83483	5e-05	0.000698837	yes
gene379	rpoH	16.6811	41.6596	1.32043	2.35423	0.00015	0.001803	yes
gene3798	PA3729	35.579	3.10911	-3.51645	-5.52012	5e-05	0.000698837	yes
gene3801	PA3732	230.837	111.46	-1.05035	-2.14155	0.0002	0.00231154	yes
gene3881	hscB	6.52321	25.7193	1.9792	2.02124	0.00635	0.0346941	yes
gene3884	iscS	24.603	48.5117	0.9795	1.92781	0.00175	0.0136591	yes
gene3889	PA3819	12.7016	59.714	2.23305	3.08932	0.0001	0.00130652	yes
gene3907	PA3836	16.2993	7.47594	-1.12448	-1.65887	0.0072	0.0379579	yes
gene3937	PA3866	57.9267	32.6472	-0.827268	-1.70364	0.00285	0.0201512	yes
gene3946	narG	4.40154	8.07275	0.875052	1.61398	0.0061	0.0345435	yes
gene411	pilG	43.3645	14.2223	-1.60836	-1.88132	0.0048	0.0282824	yes
gene4132	PA4061	8.92965	42.6481	2.25581	3.53421	5e-05	0.000698837	yes
gene4138	oprG	27.1767	9.75134	-1.4787	-2.06861	0.0021	0.015976	yes
gene414	pilJ	13.8071	6.57893	-1.06948	-1.91188	0.0015	0.01202	yes
gene4324	rplX	126.547	24.3781	-2.37602	-2.89574	0.0001	0.00130652	yes
gene4330	rplV	73.7324	13.723	-2.4257	-2.23755	0.0036	0.0243101	yes
gene4331	rpsS	993.38	192.891	-2.36456	-3.71984	5e-05	0.000698837	yes
gene4346	PA4272.1	890.17	76.9649	-3.53181	-3.9605	5e-05	0.000698837	yes
gene4349	nusG	33.143	60.2758	0.862876	1.51907	0.01085	0.0497775	yes
gene4352	tufB	29.6318	10.2742	-1.52813	-2.49072	5e-05	0.000698837	yes
gene4399	mvaT	1061.23	491.469	-1.11057	-2.22426	0.00025	0.00268304	yes
gene4451	sodB	285.132	147.322	-0.952659	-1.96854	0.00115	0.0103157	yes
gene4470	groEL	100.754	519.342	2.36584	4.78994	5e-05	0.000698837	yes
gene4551	PA4463	768.625	225.296	-1.77046	-3.50993	5e-05	0.000698837	yes
gene4562	PA4474	1.57511	19.704	3.64497	3.83695	0.00325	0.0224511	yes
gene4588	PA4500	8.97191	3.82949	-1.22826	-1.72289	0.00615	0.0345435	yes
gene4614	pilA	49.0763	6.75242	-2.86155	-2.53313	0.01025	0.0485059	yes
gene4615	pilB	7.14771	1.56705	-2.18943	-2.087	0.0085	0.042219	yes
gene4634	clpB	21.5321	641.183	4.89618	10.3745	5e-05	0.000698837	yes
gene4663	PA4571	13.6487	2.62789	-2.37679	-3.4702	5e-05	0.000698837	yes
gene4680	ccpR	20.1423	10.4282	-0.949741	-1.57754	0.0077	0.0392178	yes
gene4784	hitA	10.4753	20.2269	0.949286	1.53913	0.00885	0.0435971	yes
gene4828	dksA	933.27	242.762	-1.94275	-3.83989	5e-05	0.000698837	yes
gene4832	cbrB	3.4025	8.14844	1.25993	1.6656	0.0091	0.0444642	yes
gene4862	ftsH	18.7479	30.9454	0.722993	1.46642	0.00975	0.046506	yes
gene4871	dapB	1.20712	8.33066	2.78687	1.4514	0.00925	0.0448327	yes
gene4872	dnaJ	18.0378	149.49	3.05095	5.85741	5e-05	0.000698837	yes
gene4873	dnaK	31.4943	360.251	3.51584	7.06391	5e-05	0.000698837	yes
gene4874	grpE	16.8391	184.341	3.45249	5.52579	5e-05	0.000698837	yes
gene4882	lldP	4.00184	8.55432	1.09599	1.60525	0.00815	0.0408179	yes
gene4941	PA4828	0	12.6143	inf	-nan	5e-05	0.000698837	yes
gene4983	PA4870	6.29367	50.96	3.01739	2.55899	0.0056	0.0323615	yes
gene5020	PA4907	9.76191	26.8597	1.46021	2.09157	0.0021	0.0159759	yes
gene5030	PA4917	16.1805	3.2644	-2.30937	-1.6795	0.0033	0.0225375	yes
gene5035	azu	166.858	66.2508	-1.33261	-2.52071	5e-05	0.000698837	yes
gene5048	rpsF	48.1814	10.7881	-2.15903	-2.29553	0.00685	0.0367576	yes
gene5050	rnr	7.88061	13.4832	0.774781	1.48185	0.01055	0.0491516	yes
gene5057	hflK	17.8262	48.4164	1.4415	2.40358	0.00015	0.001803	yes
gene5058	PA4943	6.4703	27.5441	2.08984	3.39868	5e-05	0.000698837	yes
gene5120	PA5005	5.17934	12.4491	1.2652	1.94415	0.0015	0.01202	yes
gene5125	waaG	1.80622	10.3941	2.52472	2.08787	0.0063	0.0346941	yes
gene5140	metY	10.9322	1.89052	-2.53173	-2.42142	0.00025	0.00268304	yes
gene5155	pilQ	12.2848	6.43035	-0.9339	-1.68001	0.00445	0.0267445	yes
gene5157	pilO	108.242	55.8768	-0.953941	-1.64711	0.0042	0.0257571	yes
gene5168	hslV	6.10316	32.0818	2.39413	2.24884	0.00475	0.0282649	yes
gene5169	hslU	6.96398	26.8164	1.94513	3.28447	5e-05	0.000698837	yes
gene523	nirS	48.272	24.8277	-0.959236	-1.94776	0.0012	0.0106059	yes
gene5233	glnA	83.3418	30.4831	-1.45103	-2.97103	5e-05	0.000698837	yes
gene5286	arcD	399.882	49.9991	-2.9996	-4.93225	5e-05	0.000698837	yes
gene5288	arcB	458.603	150.822	-1.6044	-3.12551	5e-05	0.000698837	yes
gene5358	rho	12.316	26.3594	1.09778	2.00644	0.00085	0.00810873	yes
gene5362	hemB	44.5942	25.3888	-0.812662	-1.57048	0.00735	0.0384117	yes
gene547	PA0542	65.1469	22.9895	-1.50272	-2.22129	0.0011	0.0100167	yes
gene5562	PA5436	7.08683	14.5432	1.03713	1.71082	0.00505	0.0294665	yes
gene5623	nrdJa	8.16542	3.36928	-1.27709	-1.95924	0.0016	0.0126526	yes
gene568	PA0563	74.2912	14.1381	-2.39361	-2.52297	0.00425	0.0258005	yes
gene5680	atpD	29.3639	12.0031	-1.29064	-2.40291	5e-05	0.000698837	yes
gene5682	atpA	96.9071	47.1674	-1.03881	-2.14129	0.0004	0.00414483	yes
gene5683	atpH	37.3157	12.1271	-1.62154	-2.24178	0.0014	0.0116861	yes
gene582	rpoD	23.8147	118.195	2.31124	4.5964	5e-05	0.000698837	yes
gene583	dnaG	4.13693	35.1505	3.08691	5.14367	5e-05	0.000698837	yes
gene656	vfr	25.6241	11.8251	-1.11565	-1.55319	0.0107	0.0494669	yes
gene672	tyrZ	12.4244	39.5589	1.67082	2.95304	5e-05	0.000698837	yes
gene727	PA0716	82.3112	157.32	0.934543	1.88924	0.0009	0.00845156	yes
gene770	PA0758	8.55784	20.1953	1.2387	1.80381	0.0042	0.0257571	yes
gene775	mucA	31.219	126.381	2.01728	3.61801	5e-05	0.000698837	yes
gene791	PA0779	16.2477	308.424	4.24661	8.52567	5e-05	0.000698837	yes
gene833	PA0820	25.8366	11.1948	-1.20659	-1.74814	0.0039	0.0247286	yes
gene846	PA0833	8.50343	20.6183	1.27781	1.71387	0.00785	0.0396458	yes
gene85	PA0084	24.7043	3.69094	-2.7427	-4.03767	5e-05	0.000698837	yes
gene90	PA0089	2.89407	0.709339	-2.02855	-2.53313	0.01025	0.0485059	yes
gene920	rsmA	3626.1	22913.4	2.6597	5.64019	5e-05	0.000698837	yes
gene96	PA0095	8.16707	1.10164	-2.89017	-2.76659	0.00135	0.0114275	yes
gene978	oprD	27.184	14.9777	-0.859943	-1.61922	0.0059	0.0337705	yes
gene982	PA0962	142.736	19.455	-2.87514	-4.35522	5e-05	0.000698837	yes
gene983	aspS	5.84035	4.46639	-0.386944	0	1	1	no
gene984	pmpR	12.3199	7.50455	-0.715149	-0.898663	0.12685	0.288934	no
gene985	ruvC	5.5436	4.0287	-0.460508	0	1	1	no
gene986	ruvA	1.8141	2.14674	0.24289	0	1	1	no
gene987	ruvB	1.62758	1.24615	-0.385256	0	1	1	no
gene988	PA0968	12.6958	20.3365	0.679717	0.762421	0.174	0.339526	no
gene989	tolQ	0	0.74725	inf	0	1	1	no
gene99	PA0098	0	0.279908	inf	0	1	1	no
gene990	tolR	4.08944	3.08827	-0.405104	0	1	1	no
gene991	tolA	11.5593	14.1413	0.290866	0.435544	0.44545	0.584407	no
gene992	tolB	2.30328	4.63345	1.0084	0	1	1	no
gene993	oprL	27.0243	23.526	-0.200003	-0.3013	0.5941	0.720414	no
gene994	PA0974	1.17392	1.63058	0.474054	0	1	1	no
gene995	PA0975	1.9674	2.28772	0.217616	0	1	1	no
gene996	PA0976	0.356376	0.587243	0.720559	0	1	1	no
gene997	PA0976.1	0	0	0	0	1	1	no
gene998	PA0978	0.384703	0	-inf	0	1	1	no
gene999	PA0979	0	1.01192	inf	0	1	1	no

## Sheet: Not significant
Gene ID	Gene Name	Value 1	Value 2	log2 (fold change)	Test Statistics	p value	q value	significant
gene0	dnaA	3.83819	3.46219	-0.148738	0	1	1	no
gene1	dnaN	3.3902	2.82177	-0.264768	0	1	1	no
gene10	PA0011	4.61414	3.97682	-0.214447	0	1	1	no
gene1000	PA0981	13.8544	20.5976	0.572133	0.802954	0.1636	0.326881	no
gene1001	PA0982	1.13871	2.69307	1.24186	0	1	1	no
gene1002	PA0983	0	2.02531	inf	0	1	1	no
gene1003	PA0984	0	0	0	0	1	1	no
gene1005	PA0986	0	0	0	0	1	1	no
gene1006	PA0987	0	0.582426	inf	0	1	1	no
gene1007	PA0988	3.62096	2.92551	-0.307683	0	1	1	no
gene1008	PA0989	0	3.20293	inf	0	1	1	no
gene1009	PA0990	0	0.523	inf	0	1	1	no
gene101	PA0100	6.85444	2.62864	-1.38272	0	1	1	no
gene1010	cupC1	0.965732	1.39629	0.531905	0	1	1	no
gene1011	cupC2	0	0	0	0	1	1	no
gene1012	cupC3	0.561284	2.01603	1.84471	0	1	1	no
gene1013	ogt	2.02116	2.62109	0.374984	0	1	1	no
gene1014	pqsA	2.27924	0.341491	-2.73863	0	1	1	no
gene1015	pqsB	3.85891	0	-inf	0	1	1	no
gene1016	pqsC	0.795456	0	-inf	0	1	1	no
gene1017	pqsD	0.695514	0.526567	-0.401462	0	1	1	no
gene1018	pqsE	0.836713	0.330792	-1.33881	0	1	1	no
gene1019	phnA	7.59189	0.378052	-4.3278	-1.68311	0.18055	0.345575	no
gene102	PA0101	0.169155	0	-inf	0	1	1	no
gene1020	phnB	0.413831	0	-inf	0	1	1	no
gene1021	mvfR	1.9879	2.07334	0.0607119	0	1	1	no
gene1022	nadA	3.12807	1.37269	-1.18827	0	1	1	no
gene1023	PA1005	1.68764	2.3907	0.502425	0	1	1	no
gene1024	PA1006	0	0	0	0	1	1	no
gene1025	PA1007	1.21964	1.88711	0.629728	0	1	1	no
gene1026	bcp	0	1.29871	inf	0	1	1	no
gene1027	PA1009	0	1.82966	inf	0	1	1	no
gene1028	dapA	2.28371	0.878717	-1.37791	0	1	1	no
gene1029	PA1011	8.34142	8.68032	0.0574563	0.0849052	0.8803	0.928176	no
gene103	PA0102	0.322724	0.795652	1.30184	0	1	1	no
gene1030	PA1012	0.569081	1.33288	1.22784	0	1	1	no
gene1031	purC	6.54534	2.88098	-1.18391	0	1	1	no
gene1032	PA1013.1	0	0	0	0	1	1	no
gene1033	PA1014	2.50703	3.39171	0.436031	0	1	1	no
gene1034	PA1015	0.286625	0	-inf	0	1	1	no
gene1035	PA1016	0.257606	0.633072	1.2972	0	1	1	no
gene1036	pauA	0.260734	0.0748279	-1.80093	0	1	1	no
gene1037	PA1018	0.363137	0.562177	0.630513	0	1	1	no
gene1038	mucK	0	0.648531	inf	0	1	1	no
gene1039	PA1019a	0	0	0	0	1	1	no
gene104	PA0103	0	0.164548	inf	0	1	1	no
gene1040	PA1020	0.19305	0.15707	-0.297569	0	1	1	no
gene1041	PA1021	0	0.500805	inf	0	1	1	no
gene1042	PA1022	1.84447	1.43772	-0.359422	0	1	1	no
gene1043	PA1023	0	0.325414	inf	0	1	1	no
gene1044	PA1024	0	0.297594	inf	0	1	1	no
gene1045	PA1025	0.168691	0.36124	1.09857	0	1	1	no
gene1046	PA1026	0	0.481389	inf	0	1	1	no
gene1047	PA1027	0	0	0	0	1	1	no
gene1048	PA1028	0.163315	0	-inf	0	1	1	no
gene105	PA0103a	3.63327	3.18956	-0.18791	0	1	1	no
gene1050	PA1030	0.880199	1.85488	1.07542	0	1	1	no
gene1051	PA1030.1	0	0	0	0	1	1	no
gene1052	PA1031	0.432666	2.6861	2.63419	0	1	1	no
gene1053	quiP	0.106476	1.01886	3.25836	0	1	1	no
gene1054	PA1033	0.536606	0.49097	-0.128229	0	1	1	no
gene1055	PA1034	0	0	0	0	1	1	no
gene1056	PA1035	3.37423	2.83835	-0.249507	0	1	1	no
gene1057	PA1036	0.45673	0	-inf	0	1	1	no
gene1058	PA1037	0	2.25993	inf	0	1	1	no
gene1059	PA1038	1.11951	1.64968	0.559323	0	1	1	no
gene106	coxB	0.455555	2.16436	2.24824	0	1	1	no
gene1060	PA1039	0	0	0	0	1	1	no
gene1061	PA1040	0	0.451036	inf	0	1	1	no
gene1062	PA1041	0	0	0	0	1	1	no
gene1063	PA1042	0	3.85769	inf	0	1	1	no
gene1064	PA1043	0	0	0	0	1	1	no
gene1065	PA1044	0	0.837748	inf	0	1	1	no
gene1066	PA1045	0.632404	1.28324	1.02088	0	1	1	no
gene1067	PA1046	0.120148	0.289462	1.26857	0	1	1	no
gene1068	PA1047	0.831972	1.06794	0.360225	0	1	1	no
gene1069	PA1048	1.11924	0.532887	-1.07061	0	1	1	no
gene107	coxA	0	0.266153	inf	0	1	1	no
gene1070	pdxH	0.703151	0.620417	-0.180598	0	1	1	no
gene1071	PA1050	0	0.25741	inf	0	1	1	no
gene1072	PA1051	0.280228	0.194109	-0.529733	0	1	1	no
gene1073	PA1052	0	0	0	0	1	1	no
gene1074	PA1052a	0	1.66481	inf	0	1	1	no
gene1076	PA1054	0.723482	0.722941	-0.00107836	0	1	1	no
gene1077	PA1055	6.45297	3.15453	-1.03254	0	1	1	no
gene1078	PA1056	0.440501	0.222642	-0.984415	0	1	1	no
gene1079	PA1057	1.21419	2.73626	1.17222	0	1	1	no
gene108	PA0107	0.463589	0.639363	0.463789	0	1	1	no
gene1080	PA1058	15.0149	3.47116	-2.11291	-0.841928	0.20955	0.378197	no
gene1081	PA1059	0.952686	1.3838	0.538567	0	1	1	no
gene1082	PA1060	0.454341	0	-inf	0	1	1	no
gene1083	PA1061	0.272617	0.421227	0.627722	0	1	1	no
gene1084	PA1062	0	0.700345	inf	0	1	1	no
gene1085	PA1063	0	0	0	0	1	1	no
gene1086	PA1064	0.677287	0.298951	-1.17986	0	1	1	no
gene1087	PA1065	0.831511	0.486052	-0.774626	0	1	1	no
gene1088	PA1066	0	0	0	0	1	1	no
gene1089	PA1067	0	0	0	0	1	1	no
gene109	coIII	0.718339	0.983276	0.452932	0	1	1	no
gene1090	PA1068	0	0.13875	inf	0	1	1	no
gene1092	braG	1.15346	0.738723	-0.642867	0	1	1	no
gene1093	braF	1.58803	1.04332	-0.606054	0	1	1	no
gene1094	braE	0.475775	0.136615	-1.80017	0	1	1	no
gene1095	braD	0.911915	1.97458	1.11457	0	1	1	no
gene1096	braC	8.8924	6.58218	-0.434007	-0.611511	0.2868	0.457206	no
gene1097	PA1075	0	1.64968	inf	0	1	1	no
gene1098	PA1076	3.06551	2.03116	-0.593822	0	1	1	no
gene1099	flgB	7.59959	8.92207	0.231458	0.161002	0.76135	0.844671	no
gene11	PA0012	4.90902	4.78909	-0.0356821	0	1	1	no
gene110	PA0109	0	0	0	0	1	1	no
gene1100	flgC	4.07578	1.63165	-1.32075	0	1	1	no
gene1101	flgD	0.331418	2.41524	2.86544	0	1	1	no
gene1102	flgE	2.1517	0.509439	-2.07849	0	1	1	no
gene1103	flgF	7.87447	2.58738	-1.60569	-1.25092	0.03385	0.116251	no
gene1104	flgG	2.62948	1.7845	-0.559257	0	1	1	no
gene1105	flgH	26.7961	23.071	-0.215942	-0.363092	0.52475	0.658402	no
gene1106	flgI	0	0.157572	inf	0	1	1	no
gene1107	flgJ	2.05714	2.15491	0.066987	0	1	1	no
gene1108	flgK	2.78464	2.59504	-0.101732	0	1	1	no
gene1109	flgL	4.03797	3.60211	-0.164788	0	1	1	no
gene111	PA0110	0	0.370215	inf	0	1	1	no
gene1110	PA1088	4.59523	2.84505	-0.691684	0	1	1	no
gene1111	PA1089	1.99748	1.63804	-0.28621	0	1	1	no
gene1112	PA1090	0.681466	0.797866	0.227504	0	1	1	no
gene1113	fgtA	0.626187	0.763389	0.285826	0	1	1	no
gene1114	fliC	17.7852	14.9347	-0.252007	-0.465239	0.42055	0.570543	no
gene1115	PA1093	0	0.72054	inf	0	1	1	no
gene1118	PA1096	1.89919	6.92606	1.86665	0.67132	0.28565	0.456584	no
gene112	PA0111	0	0	0	0	1	1	no
gene1120	fleS	0.564411	0.894411	0.664192	0	1	1	no
gene1121	fleR	2.53753	1.96997	-0.365247	0	1	1	no
gene1122	fliE	2.10389	0	-inf	0	1	1	no
gene1123	fliF	0.725917	0.7223	-0.00720539	0	1	1	no
gene1124	fliG	1.24128	1.18232	-0.0702065	0	1	1	no
gene1125	PA1103	0.794822	0.232677	-1.7723	0	1	1	no
gene1126	fliI	0.869709	0.797653	-0.124772	0	1	1	no
gene1127	fliJ	0	1.07615	inf	0	1	1	no
gene1128	PA1106	0.616762	1.42046	1.20357	0	1	1	no
gene1129	PA1107	0.423757	0.738068	0.800517	0	1	1	no
gene113	PA0112	0.369255	1.12052	1.60148	0	1	1	no
gene1130	PA1108	0	0.299813	inf	0	1	1	no
gene1131	PA1109	0	0.242998	inf	0	1	1	no
gene1132	PA1110	0	0.452232	inf	0	1	1	no
gene1133	PA1111	0	0.326584	inf	0	1	1	no
gene1134	PA1112	0.258397	1.0222	1.98401	0	1	1	no
gene1135	PA1112a	7.09164	18.356	1.37206	0.921799	0.433	0.578296	no
gene1136	PA1112.1	5.18896	18.5689	1.83937	1.14046	0.27385	0.441244	no
gene1137	PA1112b	9.72461	3.31536	-1.55248	0	1	1	no
gene1138	PA1113	0.481261	1.28263	1.41422	0	1	1	no
gene1139	PA1114	0	0	0	0	1	1	no
gene114	PA0113	0.339699	0.620628	0.869472	0	1	1	no
gene1140	PA1115	0.51083	0.618518	0.275973	0	1	1	no
gene1141	PA1116	1.02585	1.02745	0.00224922	0	1	1	no
gene1142	PA1117	0	0	0	0	1	1	no
gene1143	PA1118	0.70058	0.450661	-0.636506	0	1	1	no
gene1144	yfiB	1.27762	0.688116	-0.892732	0	1	1	no
gene1145	tpbB	0.320669	0.405667	0.33921	0	1	1	no
gene1146	yfiR	2.3002	0	-inf	0	1	1	no
gene1148	PA1123	2.20075	0	-inf	0	1	1	no
gene1149	dgt	0.250933	0.794036	1.6619	0	1	1	no
gene115	senC	8.39964	5.60508	-0.583591	-0.569993	0.33655	0.490938	no
gene1150	PA1125	0.434303	1.30263	1.58466	0	1	1	no
gene1151	PA1126	0	0	0	0	1	1	no
gene1152	PA1127	0.530147	0.592985	0.161603	0	1	1	no
gene1153	PA1128	0	0.656162	inf	0	1	1	no
gene1154	PA1129	0	0	0	0	1	1	no
gene1155	rhlC	0	0.586969	inf	0	1	1	no
gene1156	PA1131	0	0	0	0	1	1	no
gene1157	PA1132	1.98391	0.755974	-1.39194	0	1	1	no
gene1158	PA1133	0.938603	0	-inf	0	1	1	no
gene1159	PA1134	0	0	0	0	1	1	no
gene116	PA0115	0.892358	1.34004	0.586584	0	1	1	no
gene1160	PA1135	0.871925	1.90011	1.12381	0	1	1	no
gene1161	PA1136	0.771608	0.263799	-1.54843	0	1	1	no
gene1162	PA1137	1.64777	0.181332	-3.18381	0	1	1	no
gene1163	PA1138	0	0	0	0	1	1	no
gene1164	PA1139	0.372782	0	-inf	0	1	1	no
gene1165	PA1140	0.379502	1.72567	2.18498	0	1	1	no
gene1166	PA1141	0	0	0	0	1	1	no
gene1167	PA1142	0	0.447183	inf	0	1	1	no
gene1168	PA1143	0	0.506506	inf	0	1	1	no
gene1169	PA1144	0	0.396238	inf	0	1	1	no
gene117	PA0116	0	0	0	0	1	1	no
gene1170	PA1145	0.456218	2.04837	2.16668	0	1	1	no
gene1171	PA1146	0	0	0	0	1	1	no
gene1172	PA1147	0	0.11208	inf	0	1	1	no
gene1173	toxA	0	0	0	0	1	1	no
gene1174	PA1149	0	0	0	0	1	1	no
gene1177	PA1153	0	1.37209	inf	0	1	1	no
gene1178	PA1154	0	1.31401	inf	0	1	1	no
gene118	PA0117	0	0.851603	inf	0	1	1	no
gene1180	nrdA	11.3256	7.84312	-0.530093	-1.02148	0.07455	0.197377	no
gene1181	PA1157	0	0.428047	inf	0	1	1	no
gene1182	PA1158	0.280228	0.443183	0.661303	0	1	1	no
gene1183	PA1159	6.38411	2.30638	-1.46885	0	1	1	no
gene1184	PA1160	0.806721	2.8362	1.81382	0	1	1	no
gene1185	rrmA	0	0	0	0	1	1	no
gene1186	dapE	0	0.397906	inf	0	1	1	no
gene1187	ndvB	0.0752211	0.348395	2.21152	0	1	1	no
gene1188	PA1164	0	0	0	0	1	1	no
gene1189	pcpS	0.452991	0.265217	-0.772308	0	1	1	no
gene119	PA0118	0.4282	0.554656	0.373308	0	1	1	no
gene1190	PA1166	0	0.373823	inf	0	1	1	no
gene1191	PA1167	0.358451	0.590754	0.720782	0	1	1	no
gene1192	PA1168	0	0	0	0	1	1	no
gene1193	PA1169	0.352193	0.656807	0.899103	0	1	1	no
gene1194	PA1170	0.448171	1.19695	1.41724	0	1	1	no
gene1195	PA1171	0	0.830013	inf	0	1	1	no
gene1196	napC	0	2.19236	inf	0	1	1	no
gene1197	napB	0.785497	0	-inf	0	1	1	no
gene1198	napA	0.53858	1.06112	0.97836	0	1	1	no
gene1199	napD	0	0	0	0	1	1	no
gene12	PA0013	0.694315	2.88959	2.0572	0	1	1	no
gene120	PA0119	0.154688	0.982602	2.66724	0	1	1	no
gene1200	napF	0	0	0	0	1	1	no
gene1201	napE	0	12.179	inf	0	1	1	no
gene1203	phoP	2.52935	5.76974	1.18974	0	1	1	no
gene1204	phoQ	2.26934	5.7216	1.33415	0	1	1	no
gene1205	PA1181	0.158307	0.480596	1.6021	0	1	1	no
gene1206	PA1182	0	0.277734	inf	0	1	1	no
gene1207	dctA	2.76511	1.72772	-0.678469	0	1	1	no
gene1208	PA1184	0	0.658461	inf	0	1	1	no
gene1209	PA1185	0	0	0	0	1	1	no
gene121	PA0120	0	0.2868	inf	0	1	1	no
gene1210	PA1186	0	0	0	0	1	1	no
gene1211	PA1187	0.521595	1.29398	1.31082	0	1	1	no
gene1212	PA1188	0	0	0	0	1	1	no
gene1213	PA1189	0	0	0	0	1	1	no
gene1214	PA1190	0	0.539124	inf	0	1	1	no
gene1215	PA1191	1.63864	4.61314	1.49325	0	1	1	no
gene1216	PA1192	1.68504	3.86813	1.19885	0	1	1	no
gene1217	PA1193	0	1.643	inf	0	1	1	no
gene1218	PA1194	0.146229	0.184759	0.337419	0	1	1	no
gene1219	PA1195	1.12655	0.908781	-0.309908	0	1	1	no
gene122	PA0121	0	1.89203	inf	0	1	1	no
gene1220	PA1196	0	0.754249	inf	0	1	1	no
gene1221	PA1197	6.16145	4.15226	-0.569372	0	1	1	no
gene1222	PA1198	5.95066	7.3124	0.297296	0.269382	0.6904	0.797104	no
gene1223	PA1199	1.88021	2.08805	0.151262	0	1	1	no
gene1224	PA1200	0.729646	0	-inf	0	1	1	no
gene1225	PA1201	0	0.198888	inf	0	1	1	no
gene1226	PA1202	0	0	0	0	1	1	no
gene1227	PA1203	3.57593	0	-inf	0	1	1	no
gene1228	PA1204	0	0	0	0	1	1	no
gene1229	PA1205	0.325266	0	-inf	0	1	1	no
gene123	PA0122	22.2507	7.04145	-1.65991	-1.25789	0.05605	0.161952	no
gene1230	PA1206	0	0.762531	inf	0	1	1	no
gene1231	kefB	0.308453	1.19485	1.9537	0	1	1	no
gene1232	PA1208	0.440501	0.111321	-1.98442	0	1	1	no
gene1233	PA1209	0	0.30177	inf	0	1	1	no
gene1234	PA1210	0.340594	0.462677	0.441953	0	1	1	no
gene1235	PA1211	0	0	0	0	1	1	no
gene1236	PA1212	0	0	0	0	1	1	no
gene1237	PA1213	0.320317	0	-inf	0	1	1	no
gene1238	PA1214	0	0.161432	inf	0	1	1	no
gene1239	PA1215	0	0.349527	inf	0	1	1	no
gene124	PA0123	0.342462	0	-inf	0	1	1	no
gene1240	PA1216	0.312873	0	-inf	0	1	1	no
gene1241	PA1217	0	0.394809	inf	0	1	1	no
gene1242	PA1218	0.969604	2.86258	1.56185	0	1	1	no
gene1243	PA1219	0	0	0	0	1	1	no
gene1244	PA1220	0.16686	0	-inf	0	1	1	no
gene1245	PA1221	0.197164	0	-inf	0	1	1	no
gene1246	PA1222	0	0.383639	inf	0	1	1	no
gene1247	PA1223	0	0.204667	inf	0	1	1	no
gene1248	PA1224	0	1.48773	inf	0	1	1	no
gene1249	PA1225	0.785472	2.23	1.50541	0	1	1	no
gene125	PA0124	0	5.28334	inf	0	1	1	no
gene1250	PA1226	0	0	0	0	1	1	no
gene1251	PA1227	0	0.436514	inf	0	1	1	no
gene1252	PA1228	0	0	0	0	1	1	no
gene1253	PA1229	0	0	0	0	1	1	no
gene1254	PA1230	0	0	0	0	1	1	no
gene1255	PA1231	0	0	0	0	1	1	no
gene1256	PA1232	0.0979951	0.381549	1.96109	0	1	1	no
gene1257	PA1233	0	2.59207	inf	0	1	1	no
gene1258	PA1234	0	0	0	0	1	1	no
gene1259	PA1235	0	0	0	0	1	1	no
gene126	PA0125	0	8.29119	inf	0	1	1	no
gene1260	PA1236	0	0.532542	inf	0	1	1	no
gene1261	PA1237	0	0.247083	inf	0	1	1	no
gene1262	PA1238	0	0.115765	inf	0	1	1	no
gene1263	PA1239	0	0	0	0	1	1	no
gene1264	PA1240	0	0	0	0	1	1	no
gene1265	PA1241	0.45673	1.3874	1.60298	0	1	1	no
gene1266	PA1242	0	0.0923472	inf	0	1	1	no
gene1267	PA1243	0.395526	0.341685	-0.211106	0	1	1	no
gene1268	PA1244	9.23232	10.5326	0.1901	0.116561	0.85015	0.904319	no
gene1269	PA1245	0	0	0	0	1	1	no
gene127	PA0126	0.745833	0.328752	-1.18185	0	1	1	no
gene1270	aprD	0	0	0	0	1	1	no
gene1271	aprE	0.224026	0	-inf	0	1	1	no
gene1272	aprF	0.198191	0.348111	0.812655	0	1	1	no
gene1273	aprA	1.23585	0.730981	-0.757601	0	1	1	no
gene1274	aprI	0	0.647906	inf	0	1	1	no
gene1275	PA1251	0	0.426205	inf	0	1	1	no
gene1276	PA1252	0	0.177417	inf	0	1	1	no
gene1277	PA1253	0	0.268421	inf	0	1	1	no
gene1278	PA1254	0	0.309064	inf	0	1	1	no
gene1279	PA1255	0	0	0	0	1	1	no
gene128	PA0127	0	0.745486	inf	0	1	1	no
gene1280	PA1256	0	0.268101	inf	0	1	1	no
gene1281	PA1257	0.378269	0.487855	0.36704	0	1	1	no
gene1282	PA1258	0	0	0	0	1	1	no
gene1283	PA1259	0	0	0	0	1	1	no
gene1284	PA1260	0	0.454627	inf	0	1	1	no
gene1285	PA1261	0	0.752358	inf	0	1	1	no
gene1286	PA1262	0	0	0	0	1	1	no
gene1287	PA1263	0.560752	2.06478	1.88055	0	1	1	no
gene1288	PA1264	0.259969	0.544397	1.06632	0	1	1	no
gene1289	PA1265	0	0	0	0	1	1	no
gene129	PA0128	35.1882	35.0111	-0.0072788	-0.00934514	0.9511	0.964438	no
gene1290	PA1266	0	0	0	0	1	1	no
gene1291	PA1267	0.267423	0.244147	-0.131375	0	1	1	no
gene1292	PA1268	0.326527	0.191176	-0.772304	0	1	1	no
gene1293	PA1269	0	0.46428	inf	0	1	1	no
gene1294	PA1270	0.448183	0.246587	-0.861994	0	1	1	no
gene1295	PA1271	0.560144	0.731399	0.38486	0	1	1	no
gene1296	cobO	0	1.11106	inf	0	1	1	no
gene1297	cobB	0	0	0	0	1	1	no
gene1298	PA1274	0	0.475778	inf	0	1	1	no
gene1299	cobD	0	0	0	0	1	1	no
gene13	PA0014	0	0	0	0	1	1	no
gene130	gabP	0.725965	0.92142	0.343959	0	1	1	no
gene1300	cobC	0	0.473666	inf	0	1	1	no
gene1301	cobQ	0.395806	0.539912	0.44793	0	1	1	no
gene1302	cobP	0	0	0	0	1	1	no
gene1303	cobU	0.376816	0	-inf	0	1	1	no
gene1304	PA1280	0	0	0	0	1	1	no
gene1305	cobV	0	0	0	0	1	1	no
gene1306	PA1282	0	0.110821	inf	0	1	1	no
gene1307	PA1283	0	0	0	0	1	1	no
gene1308	PA1284	0.15314	0.146359	-0.0653338	0	1	1	no
gene1309	PA1285	0	0	0	0	1	1	no
gene131	PA0130	4.66876	6.15154	0.397908	0	1	1	no
gene1310	PA1286	0	0	0	0	1	1	no
gene1311	PA1287	2.19087	0.987211	-1.15008	0	1	1	no
gene1312	PA1288	9.35063	6.26644	-0.577418	-0.863642	0.1353	0.298953	no
gene1313	PA1289	0	0	0	0	1	1	no
gene1314	PA1290	0.422335	0	-inf	0	1	1	no
gene1315	PA1291	0	0	0	0	1	1	no
gene1316	PA1292	0.26444	0.909751	1.78253	0	1	1	no
gene1317	PA1293	0	0.166063	inf	0	1	1	no
gene1318	rnd	0.190656	0.651072	1.77185	0	1	1	no
gene1319	PA1295	8.51057	1.93835	-2.13442	-0.851272	0.3121	0.479724	no
gene132	PA0131	0	2.32302	inf	0	1	1	no
gene1320	PA1296	0.475697	0.832053	0.806631	0	1	1	no
gene1321	PA1297	0	0.284956	inf	0	1	1	no
gene1322	PA1298	0	0	0	0	1	1	no
gene1323	PA1299	0	0	0	0	1	1	no
gene1324	PA1300	0	0	0	0	1	1	no
gene1325	PA1301	0.410432	0	-inf	0	1	1	no
gene1326	PA1302	0.529699	1.29403	1.28862	0	1	1	no
gene1327	PA1303	0	0	0	0	1	1	no
gene1328	PA1304	0	0.457753	inf	0	1	1	no
gene1329	PA1305	0	0.486052	inf	0	1	1	no
gene133	PA0132	1.81252	3.23843	0.837296	0	1	1	no
gene1330	PA1306	0	1.35208	inf	0	1	1	no
gene1331	PA1307	2.63831	0	-inf	0	1	1	no
gene1332	PA1308	0	0	0	0	1	1	no
gene1333	PA1309	0.484228	0.21446	-1.17498	0	1	1	no
gene1334	phnW	0.267423	0.244147	-0.131375	0	1	1	no
gene1335	phnX	0	0.225236	inf	0	1	1	no
gene1336	PA1312	0	0.199693	inf	0	1	1	no
gene1337	PA1313	0	0	0	0	1	1	no
gene1338	PA1314	0	0	0	0	1	1	no
gene1339	PA1315	0	1.04177	inf	0	1	1	no
gene134	PA0133	0.446984	0.634478	0.505346	0	1	1	no
gene1340	PA1316	0	0.21582	inf	0	1	1	no
gene1341	cyoA	0.219982	1.78661	3.02177	0	1	1	no
gene1342	cyoB	2.30401	6.90831	1.58419	0	1	1	no
gene1343	cyoC	0	0	0	0	1	1	no
gene1344	cyoD	1.01334	0	-inf	0	1	1	no
gene1345	cyoE	0	0	0	0	1	1	no
gene1346	PA1322	0.214955	0.145892	-0.559138	0	1	1	no
gene1347	PA1323	0	0.878318	inf	0	1	1	no
gene1348	PA1324	0	2.25821	inf	0	1	1	no
gene1349	PA1324.1	0	0	0	0	1	1	no
gene135	PA0134	0	0.123291	inf	0	1	1	no
gene1350	PA1325	0	0	0	0	1	1	no
gene1351	ilvA2	0	0	0	0	1	1	no
gene1352	PA1327	0	0.210213	inf	0	1	1	no
gene1353	PA1328	0	0.200505	inf	0	1	1	no
gene1354	PA1329	0	0	0	0	1	1	no
gene1355	PA1330	0.71133	0.379369	-0.906918	0	1	1	no
gene1356	PA1331	0	0.283005	inf	0	1	1	no
gene1357	PA1332	0	0	0	0	1	1	no
gene1358	PA1333	0	0	0	0	1	1	no
gene1359	PA1334	0	0.414479	inf	0	1	1	no
gene136	PA0135	0	0	0	0	1	1	no
gene1360	PA1335	0.228277	0.133652	-0.772307	0	1	1	no
gene1361	PA1336	0.403514	0.614467	0.606718	0	1	1	no
gene1362	ansB	3.60974	0.322355	-3.48517	0	1	1	no
gene1363	ggt	0.557506	0.876002	0.651947	0	1	1	no
gene1364	PA1339	1.4899	0.934554	-0.672861	0	1	1	no
gene1365	PA1340	0	1.25245	inf	0	1	1	no
gene1366	PA1341	0	0.401192	inf	0	1	1	no
gene1367	PA1342	39.4284	23.0722	-0.773076	-1.46345	0.0119	0.0531996	no
gene1368	PA1343	0	0	0	0	1	1	no
gene1369	PA1344	0	0.370215	inf	0	1	1	no
gene137	PA0136	0	0.345076	inf	0	1	1	no
gene1370	PA1345	0	0	0	0	1	1	no
gene1371	PA1346	0	0.10744	inf	0	1	1	no
gene1372	PA1347	0.828641	2.13061	1.36245	0	1	1	no
gene1373	PA1348	0	0.275589	inf	0	1	1	no
gene1374	PA1349	0	0.798035	inf	0	1	1	no
gene1375	PA1350	0.436554	0	-inf	0	1	1	no
gene1376	PA1351	0	0.230044	inf	0	1	1	no
gene1377	PA1352	0	0.363709	inf	0	1	1	no
gene1378	PA1353	3.17616	2.564	-0.308886	0	1	1	no
gene1379	PA1354	0	0.574813	inf	0	1	1	no
gene138	PA0137	0	0.159612	inf	0	1	1	no
gene1380	PA1355	0	0	0	0	1	1	no
gene1381	PA1356	0	0	0	0	1	1	no
gene1382	PA1357	1.67662	0	-inf	0	1	1	no
gene1383	PA1358	0	0	0	0	1	1	no
gene1384	PA1359	0	0.304477	inf	0	1	1	no
gene1385	PA1360	0.962825	1.13802	0.241185	0	1	1	no
gene1386	PA1361	0.263509	0.365121	0.470526	0	1	1	no
gene1387	PA1362	19.5169	5.83337	-1.74232	-0.927092	0.0874	0.2268	no
gene1388	PA1363	0.90333	0.810866	-0.15579	0	1	1	no
gene1389	PA1364	0	0	0	0	1	1	no
gene139	PA0138	0.441621	1.12797	1.35285	0	1	1	no
gene1390	PA1365	0	0.17132	inf	0	1	1	no
gene1391	PA1366	0.601274	2.07613	1.7878	0	1	1	no
gene1392	PA1367	0	0.346786	inf	0	1	1	no
gene1393	PA1368	0.291073	1.10751	1.92786	0	1	1	no
gene1395	PA1370	6.19827	4.2755	-0.535771	0	1	1	no
gene1396	PA1371	92.4541	88.2559	-0.0670443	-0.0560169	0.92325	0.955756	no
gene1397	PA1372	104.431	82.3089	-0.343426	-0.590349	0.2985	0.468403	no
gene1398	fabF2	0	0.355287	inf	0	1	1	no
gene1399	PA1374	0	0.439142	inf	0	1	1	no
gene14	PA0015	2.26714	0	-inf	0	1	1	no
gene140	ahpC	52.7541	29.3776	-0.844564	-1.48526	0.01305	0.0572485	no
gene1400	pdxB	0	0	0	0	1	1	no
gene1401	aceK	1.56791	1.22477	-0.356332	0	1	1	no
gene1402	PA1377	2.11147	2.62802	0.315724	0	1	1	no
gene1403	PA1378	0	0	0	0	1	1	no
gene1404	PA1379	0	0.5904	inf	0	1	1	no
gene1405	PA1380	0	0.677792	inf	0	1	1	no
gene1406	PA1381	0	1.68528	inf	0	1	1	no
gene1407	PA1382	1.19111	2.70888	1.18538	0	1	1	no
gene1408	PA1383	0.512426	1.38241	1.43177	0	1	1	no
gene1409	galE	0.299792	2.35258	2.97221	0	1	1	no
gene141	ahpF	1.10115	3.71029	1.75252	0	1	1	no
gene1410	PA1385	0.540048	2.74025	2.34315	0	1	1	no
gene1411	PA1386	0.8012	1.90607	1.25037	0	1	1	no
gene1412	PA1387	0.314127	1.13707	1.85591	0	1	1	no
gene1413	PA1388	2.25301	2.32666	0.046409	0	1	1	no
gene1414	PA1389	0.331267	0.225185	-0.556887	0	1	1	no
gene1415	PA1390	0.210207	1.60974	2.93695	0	1	1	no
gene1416	PA1391	0.207151	0.799507	1.94843	0	1	1	no
gene1417	PA1392	0.479759	0.814286	0.763226	0	1	1	no
gene1418	cysC	0	2.07031	inf	0	1	1	no
gene1419	PA1394	0	0	0	0	1	1	no
gene142	PA0141	14.0413	7.31275	-0.941186	-1.30332	0.03085	0.108426	no
gene1420	PA1395	0	1.00194	inf	0	1	1	no
gene1421	PA1396	0.229069	0.585848	1.35475	0	1	1	no
gene1422	PA1397	0.547035	0.529898	-0.0459196	0	1	1	no
gene1423	PA1398	0	0	0	0	1	1	no
gene1424	PA1399	0	0.394592	inf	0	1	1	no
gene1425	PA1400	0.0810584	0.319978	1.98094	0	1	1	no
gene1426	PA1401	0	2.62744	inf	0	1	1	no
gene1427	PA1402	0	0.896854	inf	0	1	1	no
gene1428	PA1403	0	0	0	0	1	1	no
gene1429	PA1404	0	3.48937	inf	0	1	1	no
gene143	PA0142	0	0.125488	inf	0	1	1	no
gene1430	PA1405	0	0.324228	inf	0	1	1	no
gene1431	PA1406	0	0.503362	inf	0	1	1	no
gene1432	PA1407	0	0.19192	inf	0	1	1	no
gene1433	PA1408	0.147414	0.233577	0.664025	0	1	1	no
gene1434	aphA	0.290484	0.265251	-0.131105	0	1	1	no
gene1435	PA1410	0.910779	0.50105	-0.862147	0	1	1	no
gene1436	PA1411	0	0.199693	inf	0	1	1	no
gene1437	PA1412	0	0	0	0	1	1	no
gene1438	PA1413	0	0.657884	inf	0	1	1	no
gene144	nuh	0.584088	0	-inf	0	1	1	no
gene1440	PA1415	1.24545	1.62403	0.382904	0	1	1	no
gene1441	PA1416	0.699826	0.366211	-0.934322	0	1	1	no
gene1442	PA1417	0	0	0	0	1	1	no
gene1443	PA1418	0.206959	1.72271	3.05726	0	1	1	no
gene1444	PA1419	0	0.392573	inf	0	1	1	no
gene1445	PA1420	1.39749	3.89501	1.47879	0	1	1	no
gene1446	gbuA	1.61381	0.495434	-1.70371	0	1	1	no
gene1447	gbuR	0.250441	0.524024	1.06516	0	1	1	no
gene1448	bdlA	1.96982	1.98219	0.00902857	0	1	1	no
gene1449	PA1424	0	0	0	0	1	1	no
gene145	PA0144	0.554214	0	-inf	0	1	1	no
gene1450	PA1424a	0	0	0	0	1	1	no
gene1451	PA1425	0	0	0	0	1	1	no
gene1452	PA1428a	0.976893	3.49883	1.8406	0	1	1	no
gene1453	PA1428	0	0.883585	inf	0	1	1	no
gene1454	PA1429	0.537071	0.360593	-0.574743	0	1	1	no
gene1455	lasR	10.5302	8.61376	-0.289824	-0.203467	0.7276	0.821969	no
gene1458	PA1433	0	0.212338	inf	0	1	1	no
gene1459	PA1434	0	1.30104	inf	0	1	1	no
gene146	PA0145	0	0.664487	inf	0	1	1	no
gene1460	PA1435	0	0	0	0	1	1	no
gene1461	PA1436	0.085939	0.370894	2.10962	0	1	1	no
gene1462	PA1437	0	0	0	0	1	1	no
gene1463	PA1438	0	0	0	0	1	1	no
gene1464	PA1439	0	0.616636	inf	0	1	1	no
gene1465	PA1440	2.69599	4.41316	0.710996	0	1	1	no
gene1466	PA1441	0.390796	0.217543	-0.845115	0	1	1	no
gene1467	PA1442	0.958719	0	-inf	0	1	1	no
gene1468	fliM	6.28156	4.36859	-0.523954	0	1	1	no
gene1469	fliN	2.24419	0.972103	-1.20701	0	1	1	no
gene147	PA0146	0	0.829739	inf	0	1	1	no
gene1470	fliO	0	0	0	0	1	1	no
gene1471	fliP	1.27016	1.53909	0.277072	0	1	1	no
gene1472	fliQ	0	0	0	0	1	1	no
gene1473	fliR	0.297726	0	-inf	0	1	1	no
gene1474	flhB	0.606632	0.630819	0.0564031	0	1	1	no
gene1475	PA1450	0.167314	0.135862	-0.300421	0	1	1	no
gene1476	PA1451	0.43086	0.402927	-0.0967003	0	1	1	no
gene1477	flhA	1.60824	1.84475	0.197944	0	1	1	no
gene1478	flhF	4.44363	6.01386	0.436555	0	1	1	no
gene1479	fleN	1.51861	1.14631	-0.405749	0	1	1	no
gene148	PA0147	0	0.66511	inf	0	1	1	no
gene1480	fliA	7.04161	9.91268	0.493371	0.574423	0.31695	0.482245	no
gene1481	cheY	35.5537	20.6	-0.787352	-0.979151	0.09655	0.241777	no
gene1482	cheZ	11.7921	14.5177	0.3	0.435755	0.44085	0.583234	no
gene1483	PA1458	2.40783	2.28632	-0.0747056	0	1	1	no
gene1484	PA1459	0.38854	0.575229	0.566076	0	1	1	no
gene1485	motC	1.17448	0	-inf	0	1	1	no
gene1486	motD	0.463885	0	-inf	0	1	1	no
gene1487	PA1462	0.29207	0	-inf	0	1	1	no
gene1488	PA1463	0.351027	0	-inf	0	1	1	no
gene1489	PA1464	8.02835	6.33523	-0.341708	-0.254378	0.7089	0.809582	no
gene149	PA0148	0.464909	0.865063	0.895857	0	1	1	no
gene1490	PA1465	0	0	0	0	1	1	no
gene1491	PA1466	0	0.5736	inf	0	1	1	no
gene1492	PA1467	0	0.30323	inf	0	1	1	no
gene1493	PA1468	0	1.93831	inf	0	1	1	no
gene1494	PA1469	0.326147	0	-inf	0	1	1	no
gene1495	PA1470	0	0	0	0	1	1	no
gene1496	PA1471	0	2.99024	inf	0	1	1	no
gene1497	PA1472	0	0	0	0	1	1	no
gene1498	PA1473	0	1.47985	inf	0	1	1	no
gene1499	PA1474	0.33278	0.804973	1.27437	0	1	1	no
gene15	trkA	1.4019	2.39685	0.77376	0	1	1	no
gene150	PA0149	0	0	0	0	1	1	no
gene1500	ccmA	0	0	0	0	1	1	no
gene1501	ccmB	0	0	0	0	1	1	no
gene1502	ccmC	2.34872	0.66644	-1.81733	0	1	1	no
gene1503	PA1478	0	0	0	0	1	1	no
gene1504	ccmE	7.77617	0.92715	-3.06818	-1.16205	0.21505	0.382382	no
gene1505	ccmF	0.769278	0.431857	-0.832952	0	1	1	no
gene1506	ccmG	5.70436	5.22361	-0.127018	0	1	1	no
gene1507	ccmH	0	0.495649	inf	0	1	1	no
gene1508	cycH	1.46795	1.42165	-0.0462359	0	1	1	no
gene1509	PA1483a	0	0	0	0	1	1	no
gene151	PA0150	0	0	0	0	1	1	no
gene1510	PA1484	0	0.363204	inf	0	1	1	no
gene1511	PA1485	0	0	0	0	1	1	no
gene1512	PA1486	0	0.407192	inf	0	1	1	no
gene1513	PA1487	0	0.185205	inf	0	1	1	no
gene1514	PA1488	0	0.226786	inf	0	1	1	no
gene1515	PA1489	0.326652	0	-inf	0	1	1	no
gene1516	PA1490	0.552011	0	-inf	0	1	1	no
gene1517	PA1491	0	0.355501	inf	0	1	1	no
gene1518	PA1492	0	0	0	0	1	1	no
gene1519	cysP	6.11199	2.26654	-1.43115	0	1	1	no
gene152	PA0151	0	0.175504	inf	0	1	1	no
gene1520	PA1494	0	0.67242	inf	0	1	1	no
gene1521	PA1495	0	0	0	0	1	1	no
gene1522	PA1496	0	0	0	0	1	1	no
gene1523	PA1497	0	0	0	0	1	1	no
gene1524	pykF	0	0.182561	inf	0	1	1	no
gene1525	PA1499	0	0	0	0	1	1	no
gene1526	PA1500	0	0	0	0	1	1	no
gene1527	PA1501	1.68283	1.89943	0.174672	0	1	1	no
gene1528	gcl	0	1.30928	inf	0	1	1	no
gene1529	PA1503	0	0	0	0	1	1	no
gene153	pcaQ	0.384703	0.370602	-0.0538707	0	1	1	no
gene1530	PA1504	0	1.78148	inf	0	1	1	no
gene1531	moaA2	1.64149	1.24164	-0.402753	0	1	1	no
gene1532	PA1506	0	0	0	0	1	1	no
gene1533	PA1507	1.13083	0.572964	-0.980863	0	1	1	no
gene1534	PA1508	0	0	0	0	1	1	no
gene1536	PA1510	5.50493	2.72005	-1.01709	0	1	1	no
gene1537	PA1511	0.15558	0.199947	0.361962	0	1	1	no
gene1538	hcpA	0	0	0	0	1	1	no
gene1539	PA1513	0.757397	3.26888	2.10968	0	1	1	no
gene154	pcaH	0.788304	0.690569	-0.190966	0	1	1	no
gene1540	PA1514	0	0	0	0	1	1	no
gene1541	alc	0	0.293235	inf	0	1	1	no
gene1542	PA1516	0	0.670242	inf	0	1	1	no
gene1543	PA1517	1.14802	1.33982	0.222897	0	1	1	no
gene1544	PA1518	1.18762	0	-inf	0	1	1	no
gene1545	PA1519	0	0.330761	inf	0	1	1	no
gene1546	PA1520	1.2606	1.10836	-0.185675	0	1	1	no
gene1547	PA1521	0	0	0	0	1	1	no
gene1548	PA1522	0	0.221195	inf	0	1	1	no
gene1549	xdhB	0.575896	0.998645	0.794163	0	1	1	no
gene155	pcaG	0	1.09499	inf	0	1	1	no
gene1550	xdhA	0.535776	0.303593	-0.819491	0	1	1	no
gene1551	alkB2	0.986327	0.982632	-0.0054151	0	1	1	no
gene1552	PA1526	0	1.303	inf	0	1	1	no
gene1553	PA1527	3.97288	2.71985	-0.546658	0	1	1	no
gene1555	lig	0	0.881516	inf	0	1	1	no
gene1556	PA1530	0	0	0	0	1	1	no
gene1557	ffs	0.229848	0.292563	0.348067	0	1	1	no
gene1558	PA1531	2.30942	2.97016	0.363012	0	1	1	no
gene1559	dnaX	1.08886	0.759907	-0.518927	0	1	1	no
gene156	pcaR	0.377799	1.13284	1.58425	0	1	1	no
gene1561	recR	1.57665	0.347183	-2.18309	0	1	1	no
gene1562	PA1535	0.186042	0.55042	1.56491	0	1	1	no
gene1563	PA1536	0.911499	0	-inf	0	1	1	no
gene1564	PA1537	0	0.734799	inf	0	1	1	no
gene1565	PA1538	0	0.839487	inf	0	1	1	no
gene1566	PA1539	0.372782	2.41294	2.69439	0	1	1	no
gene1567	PA1540	0	0	0	0	1	1	no
gene1568	PA1541	0	1.88589	inf	0	1	1	no
gene1569	PA1542	0.922388	0.346786	-1.41133	0	1	1	no
gene157	PA0156	0.710679	0.880154	0.308559	0	1	1	no
gene1570	apt	0	0	0	0	1	1	no
gene1571	anr	5.95433	3.74724	-0.668113	0	1	1	no
gene1572	PA1545	83.5152	91.77	0.135983	0.25514	0.65125	0.770517	no
gene1573	hemN	8.30355	8.42582	0.0210903	0.033437	0.96395	0.968786	no
gene1574	PA1547	0	0.288476	inf	0	1	1	no
gene1575	PA1548	0	0	0	0	1	1	no
gene1576	PA1549	0.673809	0.808229	0.262423	0	1	1	no
gene1577	PA1550	11.1725	2.45467	-2.18635	-1.21413	0.07535	0.19862	no
gene1578	PA1551	9.28703	11.3111	0.284454	0.482656	0.40755	0.561736	no
gene1579	ccoP1	7.3732	3.54743	-1.05552	-1.08761	0.0652	0.178115	no
gene158	PA0157	0	0.164402	inf	0	1	1	no
gene1580	ccoQ1	0	0	0	0	1	1	no
gene1581	ccoO1	3.12423	2.7686	-0.174344	0	1	1	no
gene1582	ccoN1	3.16995	3.21703	0.0212731	0	1	1	no
gene1584	ccoQ2	18.9854	13.91	-0.448772	-0.21727	0.76725	0.845363	no
gene1585	ccoO2	12.123	3.7474	-1.69378	-1.27804	0.0486	0.148267	no
gene1587	PA1558	0	0.320248	inf	0	1	1	no
gene1589	aer	13.154	16.1709	0.297904	0.550576	0.34235	0.495789	no
gene159	PA0158	0.819899	0.449536	-0.867009	0	1	1	no
gene1590	acnA	2.82851	5.92392	1.06651	0	1	1	no
gene1591	PA1563	0.375534	0.699705	0.897803	0	1	1	no
gene1592	PA1564	0	1.70967	inf	0	1	1	no
gene1593	PA1565	0	1.04165	inf	0	1	1	no
gene1594	PA1566	0	0	0	0	1	1	no
gene1595	PA1567	1.01978	0.967406	-0.0760624	0	1	1	no
gene1596	PA1568	0	1.24491	inf	0	1	1	no
gene1597	PA1569	0.210581	0	-inf	0	1	1	no
gene1598	PA1570	0	2.41684	inf	0	1	1	no
gene1599	PA1571	0	3.31857	inf	0	1	1	no
gene16	PA0017	0.810124	0.521875	-0.634437	0	1	1	no
gene160	PA0159	0.236023	0.509082	1.10897	0	1	1	no
gene1600	PA1572	1.99969	2.63281	0.396828	0	1	1	no
gene1601	PA1573	0	1.66125	inf	0	1	1	no
gene1602	PA1574	0	0	0	0	1	1	no
gene1603	PA1575	2.92266	2.19601	-0.4124	0	1	1	no
gene1604	PA1576	0.259969	0.876185	1.7529	0	1	1	no
gene1605	PA1577	3.86543	2.16329	-0.837403	0	1	1	no
gene1606	PA1578	0.30817	0	-inf	0	1	1	no
gene1607	PA1578a	2.64768	0	-inf	0	1	1	no
gene1608	PA1579	9.36496	7.37877	-0.343892	-0.363617	0.5272	0.658726	no
gene1609	gltA	5.21954	5.41369	0.052688	0	1	1	no
gene161	PA0160	9.25315	9.03638	-0.0341991	0	1	1	no
gene1610	sdhC	49.4142	48.7297	-0.020124	-0.0297397	0.9682	0.969814	no
gene1611	sdhD	8.49661	16.4855	0.956242	0.617896	0.3134	0.480035	no
gene1612	sdhA	10.8454	13.0671	0.268848	0.492852	0.3933	0.54843	no
gene1614	sucA	8.42561	5.88321	-0.518176	-0.95005	0.1018	0.248707	no
gene1615	sucB	15.8252	11.8496	-0.417383	-0.729417	0.20665	0.376669	no
gene1616	lpdG	1.7091	1.87235	0.131612	0	1	1	no
gene1617	sucC	29.0246	22.7275	-0.352842	-0.593226	0.3045	0.472534	no
gene1618	sucD	13.3858	8.14652	-0.716449	-0.571893	0.34075	0.494664	no
gene1619	braB	0.638012	0.936508	0.553708	0	1	1	no
gene162	opdC	0.599352	0.985493	0.717441	0	1	1	no
gene1620	PA1591	0.563275	1.18848	1.07721	0	1	1	no
gene1621	PA1592	8.33205	12.8285	0.622611	0.479385	0.30585	0.472534	no
gene1622	PA1593	0	0	0	0	1	1	no
gene1623	PA1594	0.911387	0	-inf	0	1	1	no
gene1624	PA1595	0	0	0	0	1	1	no
gene1626	PA1597	0	0	0	0	1	1	no
gene1627	PA1598	0	0.454627	inf	0	1	1	no
gene1628	PA1599	0	0.377502	inf	0	1	1	no
gene1629	PA1600	0	0.334727	inf	0	1	1	no
gene163	PA0163	0	0.236019	inf	0	1	1	no
gene1630	PA1601	0.370017	0.338168	-0.129851	0	1	1	no
gene1631	PA1602	1.04908	1.22596	0.22478	0	1	1	no
gene1632	PA1603	1.33764	0	-inf	0	1	1	no
gene1633	PA1604	0.700767	1.50783	1.10546	0	1	1	no
gene1634	PA1605	0.210207	0.876705	2.06028	0	1	1	no
gene1635	PA1606	0	1.23651	inf	0	1	1	no
gene1636	PA1607	0	0	0	0	1	1	no
gene1637	PA1608	0.904737	0.916827	0.0191512	0	1	1	no
gene1638	fabB	3.45575	4.43497	0.359927	0	1	1	no
gene1639	fabA	0	1.9538	inf	0	1	1	no
gene164	PA0164	0.475891	0.523462	0.137453	0	1	1	no
gene1640	PA1611	0.821656	0.565329	-0.539445	0	1	1	no
gene1641	PA1612	0	0.392972	inf	0	1	1	no
gene1642	PA1613	0.260757	0.715817	1.45688	0	1	1	no
gene1643	gpsA	5.14565	6.58522	0.355879	0	1	1	no
gene1644	PA1615	2.42377	0	-inf	0	1	1	no
gene1645	PA1616	0	1.00118	inf	0	1	1	no
gene1646	PA1617	0	0	0	0	1	1	no
gene1647	PA1618	0	0.864043	inf	0	1	1	no
gene1648	PA1619	0.386468	0.372326	-0.053783	0	1	1	no
gene1649	PA1620	0	0	0	0	1	1	no
gene165	PA0165	6.63273	4.91345	-0.432866	0	1	1	no
gene1650	PA1621	0.281379	0.379383	0.431139	0	1	1	no
gene1651	PA1622	0	0	0	0	1	1	no
gene1652	PA1623	3.80152	1.79206	-1.08496	0	1	1	no
gene1653	PA1624	0.283978	0.595881	1.06925	0	1	1	no
gene1654	PA1625	0.563476	1.29301	1.1983	0	1	1	no
gene1655	PA1626	0	0.342925	inf	0	1	1	no
gene1656	PA1627	0	0	0	0	1	1	no
gene1657	PA1628	0	0	0	0	1	1	no
gene1658	PA1629	0	0	0	0	1	1	no
gene1659	PA1630	1.8294	1.96498	0.103146	0	1	1	no
gene166	PA0166	0.442898	0.794235	0.842589	0	1	1	no
gene1660	PA1631	0	0.234447	inf	0	1	1	no
gene1661	kdpF	6.03907	3.05802	-0.98173	0	1	1	no
gene1662	kdpA	0	0.248322	inf	0	1	1	no
gene1663	kdpB	0	0	0	0	1	1	no
gene1664	kdpC	0	0	0	0	1	1	no
gene1665	kdpD	0	0.244735	inf	0	1	1	no
gene1666	kdpE	0	0.442863	inf	0	1	1	no
gene1667	PA1638	0.245443	0	-inf	0	1	1	no
gene1668	PA1639	0.580888	0	-inf	0	1	1	no
gene1669	PA1640	0.500981	0.607495	0.278117	0	1	1	no
gene167	PA0167	3.95579	5.07994	0.360847	0	1	1	no
gene1670	PA1641	0	0	0	0	1	1	no
gene1671	selD	0.210207	0.28089	0.418194	0	1	1	no
gene1672	PA1643	0.193658	0.648993	1.74469	0	1	1	no
gene1673	PA1643a	0	0	0	0	1	1	no
gene1674	PA1644	1.75177	1.92181	0.133656	0	1	1	no
gene1675	PA1645	1.05722	0	-inf	0	1	1	no
gene1676	PA1646	0.327197	0	-inf	0	1	1	no
gene1677	PA1647	0	0.0953843	inf	0	1	1	no
gene1678	PA1648	0	0	0	0	1	1	no
gene1679	PA1649	0.566163	0	-inf	0	1	1	no
gene168	PA0168	0	0.55069	inf	0	1	1	no
gene1680	PA1650	0.60001	1.58906	1.40512	0	1	1	no
gene1681	PA1651	0.324731	0.449656	0.469576	0	1	1	no
gene1682	PA1652	0	0	0	0	1	1	no
gene1683	PA1653	0	0	0	0	1	1	no
gene1684	PA1654	1.72477	1.74536	0.0171219	0	1	1	no
gene1685	PA1655	4.5216	2.16173	-1.06465	0	1	1	no
gene1687	PA1657	6.91489	0.439142	-3.97695	0	1	1	no
gene1689	PA1659	1.4629	0.616636	-1.24634	0	1	1	no
gene169	PA0169	0	0.706037	inf	0	1	1	no
gene1690	PA1660	3.54766	0.754625	-2.23304	0	1	1	no
gene1691	PA1661	0.735699	0	-inf	0	1	1	no
gene1692	PA1662	0.605722	0.340652	-0.830356	0	1	1	no
gene1693	PA1663	0.13619	0	-inf	0	1	1	no
gene1694	PA1664	0	0	0	0	1	1	no
gene1695	PA1665	0	0	0	0	1	1	no
gene1696	PA1666	3.10912	0	-inf	0	1	1	no
gene1697	PA1667	0.688833	0.66198	-0.0573683	0	1	1	no
gene1698	PA1668	1.2011	0	-inf	0	1	1	no
gene1699	PA1669	0.744333	0.143479	-2.37511	0	1	1	no
gene17	fmt	1.68226	1.78221	0.0832669	0	1	1	no
gene170	PA0170	1.60368	0	-inf	0	1	1	no
gene1700	stp1	0	0	0	0	1	1	no
gene1701	stk1	0	0	0	0	1	1	no
gene1702	PA1672	1.18762	0	-inf	0	1	1	no
gene1703	PA1673	88.1136	64.2424	-0.45584	-0.855851	0.13525	0.298953	no
gene1704	folE2	7.33259	11.6601	0.66919	0.659256	0.2023	0.371811	no
gene1705	PA1675	0	0.381924	inf	0	1	1	no
gene1706	PA1676	0	0	0	0	1	1	no
gene1707	PA1677	3.4066	1.43303	-1.24926	0	1	1	no
gene1708	PA1678	0.448801	0.397775	-0.174122	0	1	1	no
gene1709	PA1679	0.964304	0.379369	-1.34589	0	1	1	no
gene171	PA0171	2.73952	3.9232	0.518105	0	1	1	no
gene1710	PA1680	0.223175	0.298705	0.420544	0	1	1	no
gene1711	aroC	0.394775	0.674513	0.772817	0	1	1	no
gene1712	PA1682	0	0.633072	inf	0	1	1	no
gene1713	PA1683	0	1.91367	inf	0	1	1	no
gene1714	PA1684	2.31957	1.66573	-0.477702	0	1	1	no
gene1715	masA	0.436554	0	-inf	0	1	1	no
gene1716	alkA	0	0	0	0	1	1	no
gene1717	speE	0.746414	0.643379	-0.214307	0	1	1	no
gene1718	PA1688	2.89379	4.8065	0.732027	0	1	1	no
gene1719	PA1689	0.92596	1.19755	0.371069	0	1	1	no
gene172	PA0172	0.378073	0.340335	-0.151709	0	1	1	no
gene1720	pscU	0	0	0	0	1	1	no
gene1721	pscT	0	0.239457	inf	0	1	1	no
gene1722	PA1692	0	1.35737	inf	0	1	1	no
gene1723	pscR	2.48376	3.95329	0.670526	0	1	1	no
gene1724	pscQ	0	0.499118	inf	0	1	1	no
gene1725	pscP	0	0.245711	inf	0	1	1	no
gene1726	pscO	0	0	0	0	1	1	no
gene1727	PA1697	0	0.12843	inf	0	1	1	no
gene1728	popN	0	0.331787	inf	0	1	1	no
gene1729	PA1699	0	0	0	0	1	1	no
gene173	PA0173	0.206675	0.276047	0.417555	0	1	1	no
gene1730	PA1700	0	0	0	0	1	1	no
gene1731	PA1701	0	0	0	0	1	1	no
gene1732	PA1702	0	0	0	0	1	1	no
gene1733	pcrD	0.528686	0.716977	0.439516	0	1	1	no
gene1734	pcrR	0	0	0	0	1	1	no
gene1735	pcrG	0	0	0	0	1	1	no
gene1736	pcrV	1.54315	2.63111	0.769795	0	1	1	no
gene1737	pcrH	14.458	6.21846	-1.21724	-0.822892	0.194	0.364356	no
gene1738	popB	14.9865	12.2901	-0.286161	-0.443723	0.42955	0.577538	no
gene1739	popD	1.78917	0.661238	-1.43605	0	1	1	no
gene174	PA0174	0	0	0	0	1	1	no
gene1740	exsC	0	1.41386	inf	0	1	1	no
gene1741	PA1711	0	0	0	0	1	1	no
gene1742	exsB	0	1.96192	inf	0	1	1	no
gene1743	exsA	1.53228	3.37249	1.13813	0	1	1	no
gene1744	exsD	0.547722	1.41043	1.36462	0	1	1	no
gene1745	pscB	0	0	0	0	1	1	no
gene1746	pscC	0.60326	0.759711	0.33267	0	1	1	no
gene1747	pscD	0.609651	0.989672	0.698967	0	1	1	no
gene1748	pscE	34.6787	0	-inf	-nan	0.182	0.347244	no
gene1749	pscF	3.62265	16.213	2.16203	1.38225	0.2434	0.409926	no
gene175	PA0175	0	1.14631	inf	0	1	1	no
gene1750	pscG	0	0	0	0	1	1	no
gene1751	pscH	0	0.562049	inf	0	1	1	no
gene1752	pscI	0.997492	0	-inf	0	1	1	no
gene1753	pscJ	0.312873	1.24826	1.99627	0	1	1	no
gene1754	pscK	0	0	0	0	1	1	no
gene1755	pscL	2.48174	1.45278	-0.77254	0	1	1	no
gene1756	bglX	0.205265	0.356246	0.795387	0	1	1	no
gene1757	mucR	0.133903	0.122116	-0.132938	0	1	1	no
gene1758	PA1728	0	0	0	0	1	1	no
gene1759	PA1729	0.703151	0	-inf	0	1	1	no
gene176	aer2	0.919967	0.563197	-0.707942	0	1	1	no
gene1760	PA1730	0.878361	0.194785	-2.17293	0	1	1	no
gene1761	PA1731	0	0.188978	inf	0	1	1	no
gene1762	PA1732	0.286625	0.60157	1.06957	0	1	1	no
gene1763	PA1733	0	0	0	0	1	1	no
gene1764	PA1734	0	0	0	0	1	1	no
gene1765	PA1735	0.352496	0	-inf	0	1	1	no
gene1766	PA1736	0.741982	0	-inf	0	1	1	no
gene1767	PA1737	0.256001	0.122228	-1.06657	0	1	1	no
gene1768	PA1738	0	1.34515	inf	0	1	1	no
gene1769	PA1739	0.315517	0.288167	-0.130811	0	1	1	no
gene177	PA0177	0	0.467908	inf	0	1	1	no
gene1770	PA1740	0	0	0	0	1	1	no
gene1771	PA1741	0	0	0	0	1	1	no
gene1772	PA1742	6.30633	16.1357	1.35538	1.61379	0.0123	0.0543551	no
gene1773	PA1743	0	0	0	0	1	1	no
gene1774	PA1744	0	5.96324	inf	0	1	1	no
gene1775	PA1745	0	0.773947	inf	0	1	1	no
gene1776	PA1746	2.55523	2.63485	0.0442677	0	1	1	no
gene1777	PA1747	5.75726	0	-inf	0	1	1	no
gene1778	PA1748	2.86437	8.37441	1.54777	1.12032	0.0453	0.141886	no
gene1779	PA1749	0.560165	2.18512	1.96379	0	1	1	no
gene178	PA0178	0.543841	0.385517	-0.496392	0	1	1	no
gene1780	PA1750	16.6154	17.1379	0.0446731	0.0789761	0.89265	0.93627	no
gene1781	PA1751	0	2.37708	inf	0	1	1	no
gene1782	PA1752	1.22153	0.312704	-1.96582	0	1	1	no
gene1783	PA1753	2.62372	1.95585	-0.423816	0	1	1	no
gene1785	PA1755	0	0	0	0	1	1	no
gene1786	cysH	1.25518	0.23378	-2.42467	0	1	1	no
gene1787	thrH	0.750895	0.661898	-0.182003	0	1	1	no
gene1788	pabB	0.153148	0.193619	0.338297	0	1	1	no
gene1789	PA1759	0.905396	1.70349	0.911875	0	1	1	no
gene179	PA0179	2.59881	1.91333	-0.441765	0	1	1	no
gene1790	PA1760	1.03275	1.16146	0.169455	0	1	1	no
gene1791	PA1761	0	0	0	0	1	1	no
gene1792	PA1762	0.305112	0	-inf	0	1	1	no
gene1793	PA1763	0.295582	0.456935	0.628429	0	1	1	no
gene1794	PA1764	0.176952	0.434289	1.2953	0	1	1	no
gene1795	PA1765	0.179002	0.982869	2.45702	0	1	1	no
gene1796	PA1766	12.6449	8.06838	-0.648203	-0.938269	0.09855	0.244746	no
gene1797	PA1767	3.02573	1.86132	-0.700958	0	1	1	no
gene1798	PA1768	2.9889	3.34681	0.163174	0	1	1	no
gene1799	PA1769	10.7313	8.30972	-0.368955	-0.475406	0.40025	0.555543	no
gene18	def	6.39053	2.78145	-1.2001	0	1	1	no
gene180	cttP	0.433851	0.472083	0.121841	0	1	1	no
gene1800	ppsA	6.09039	6.45896	0.0847682	0	1	1	no
gene1801	estX	0	0	0	0	1	1	no
gene1802	PA1772	6.50214	13.3732	1.04036	1.0018	0.0829	0.216621	no
gene1804	crfX	0	2.66443	inf	0	1	1	no
gene1805	cmpX	78.4729	101.247	0.367607	0.755979	0.1852	0.352232	no
gene1806	sigX	28.564	36.1479	0.339716	0.541116	0.3468	0.498629	no
gene1807	oprF	100.312	79.9177	-0.327911	-0.683335	0.2209	0.389328	no
gene1808	cobA	0	0	0	0	1	1	no
gene1809	PA1779	0	0.0578755	inf	0	1	1	no
gene181	PA0181	0.237849	0	-inf	0	1	1	no
gene1810	nirD	0	0	0	0	1	1	no
gene1811	nirB	0.0804355	0.543375	2.75604	0	1	1	no
gene1812	PA1781.1	0	0	0	0	1	1	no
gene1813	PA1782	0	0.377254	inf	0	1	1	no
gene1814	nasA	0	0.232719	inf	0	1	1	no
gene1815	PA1784	0	0.930727	inf	0	1	1	no
gene1816	PA1785	0	0.601198	inf	0	1	1	no
gene1817	PA1786	0	0	0	0	1	1	no
gene1818	acnB	2.3655	1.71492	-0.464008	0	1	1	no
gene1819	PA1788	0	0.495649	inf	0	1	1	no
gene182	PA0182	0	0	0	0	1	1	no
gene1820	PA1789	6.83107	2.33449	-1.54901	0	1	1	no
gene1821	PA1790	0	0	0	0	1	1	no
gene1822	PA1791	3.66774	0.860612	-2.09146	0	1	1	no
gene1823	PA1792	0	0	0	0	1	1	no
gene1824	ppiB	6.48405	1.45936	-2.15155	0	1	1	no
gene1825	glnS	3.05447	3.34323	0.13032	0	1	1	no
gene1826	cysS	5.32062	8.27311	0.636833	0.8955	0.11725	0.275263	no
gene1827	folD	1.71605	1.91456	0.157921	0	1	1	no
gene1828	PA1796.1	0	0	0	0	1	1	no
gene1829	PA1796.2	0	0	0	0	1	1	no
gene183	atsA	0.230985	0.160084	-0.528969	0	1	1	no
gene1830	PA1796.3	0	0	0	0	1	1	no
gene1831	PA1796.4	0	0	0	0	1	1	no
gene1832	PA1797a	0	0	0	0	1	1	no
gene1833	PA1797	0	0.372981	inf	0	1	1	no
gene1834	parS	0.452872	1.52569	1.75229	0	1	1	no
gene1835	parR	1.09444	1.13648	0.0543862	0	1	1	no
gene1836	tig	6.74088	4.68233	-0.525712	0	1	1	no
gene1837	clpP	9.50374	10.7244	0.174326	0.201216	0.7266	0.821969	no
gene184	PA0184	0	0	0	0	1	1	no
gene1840	hupB	12.9853	4.68474	-1.47084	-0.825393	0.29545	0.466051	no
gene1841	PA1804.1	0	0	0	0	1	1	no
gene1842	ppiD	5.80747	5.85408	0.0115322	0	1	1	no
gene1843	fabI	1.26702	0.860627	-0.557979	0	1	1	no
gene1844	PA1807	0.126915	0.205477	0.695114	0	1	1	no
gene1845	PA1808	0.213862	0.446111	1.06073	0	1	1	no
gene1846	PA1809	0.753512	1.52464	1.01677	0	1	1	no
gene1847	PA1810	3.35684	3.51227	0.0652985	0	1	1	no
gene1848	PA1811	2.61799	1.77797	-0.558225	0	1	1	no
gene1849	mltD	2.05187	0.769551	-1.41485	0	1	1	no
gene185	PA0185	0.126393	0	-inf	0	1	1	no
gene1850	PA1813	0.71482	0.488403	-0.549509	0	1	1	no
gene1851	PA1814	0	0.641372	inf	0	1	1	no
gene1852	rnhA	3.4018	5.30259	0.640399	0	1	1	no
gene1853	dnaQ	0	0	0	0	1	1	no
gene1854	PA1817	5.79076	7.00445	0.27452	0.163096	0.7788	0.854122	no
gene1855	ldcA	1.44527	0.930526	-0.635221	0	1	1	no
gene1856	PA1819	0	0.319454	inf	0	1	1	no
gene1857	nhaB	0.439506	0.333211	-0.399445	0	1	1	no
gene1858	PA1821	1.32292	0.691505	-0.935913	0	1	1	no
gene1859	fimL	1.16319	0.249304	-2.22211	0	1	1	no
gene186	PA0186	0	1.4412	inf	0	1	1	no
gene1860	PA1823	1.57333	1.77141	0.171074	0	1	1	no
gene1861	PA1824	0	0.242998	inf	0	1	1	no
gene1862	PA1825	0	0	0	0	1	1	no
gene1863	PA1826	0.246426	0.330792	0.424767	0	1	1	no
gene1864	PA1827	0.427686	0	-inf	0	1	1	no
gene1865	PA1828	1.16464	0	-inf	0	1	1	no
gene1866	PA1829	1.94171	2.37348	0.289676	0	1	1	no
gene1867	PA1830	14.0917	0.975208	-3.853	-0.966546	0.10655	0.257175	no
gene1868	PA1831	0.953441	0.822176	-0.213696	0	1	1	no
gene1869	PA1832	2.64573	2.33965	-0.177371	0	1	1	no
gene187	PA0187	0	1.19457	inf	0	1	1	no
gene1870	PA1833	0	0	0	0	1	1	no
gene1871	PA1833a	1.24398	0.209895	-2.56722	0	1	1	no
gene1872	PA1835	0	1.41386	inf	0	1	1	no
gene1873	PA1836	0	0.562761	inf	0	1	1	no
gene1874	PA1837	0	0	0	0	1	1	no
gene1875	cysI	1.73803	0.361237	-2.26644	0	1	1	no
gene1876	PA1837a	5.02184	0	-inf	0	1	1	no
gene1877	PA1839	1.15007	0.340146	-1.7575	0	1	1	no
gene1878	PA1840	0.886118	0	-inf	0	1	1	no
gene1879	PA1841	0	0	0	0	1	1	no
gene188	PA0188	0.254588	0.532887	1.06567	0	1	1	no
gene1880	PA1842	3.04464	0	-inf	0	1	1	no
gene1881	metH	0.805265	0.936215	0.217377	0	1	1	no
gene1882	PA1844	0	0	0	0	1	1	no
gene1883	PA1845	0	0	0	0	1	1	no
gene1884	cti	0.741624	1.59715	1.10674	0	1	1	no
gene1885	PA1847	18.0686	15.0027	-0.268258	-0.366275	0.52675	0.658726	no
gene1886	PA1848	0	0	0	0	1	1	no
gene1887	PA1849	0	0	0	0	1	1	no
gene1888	PA1850	0	0	0	0	1	1	no
gene1889	PA1851	0	0.36582	inf	0	1	1	no
gene189	PA0189	0.15353	0.194109	0.338346	0	1	1	no
gene1890	PA1852	37.9956	26.0907	-0.542294	-0.544517	0.3344	0.490181	no
gene1891	PA1853	0.261072	0	-inf	0	1	1	no
gene1892	PA1854	0	0.245567	inf	0	1	1	no
gene1893	PA1855	0	0	0	0	1	1	no
gene1894	PA1856	0.261635	0.422781	0.692351	0	1	1	no
gene1895	PA1857	1.59595	0.896122	-0.832649	0	1	1	no
gene1896	str	0	0.225236	inf	0	1	1	no
gene1897	PA1859	0	0.339201	inf	0	1	1	no
gene1898	PA1860	0	0	0	0	1	1	no
gene1899	modC	0.198663	0.161706	-0.296947	0	1	1	no
gene19	PA0020	2.20961	2.25676	0.0304565	0	1	1	no
gene190	PA0190	0	0	0	0	1	1	no
gene1900	modB	0	0.448032	inf	0	1	1	no
gene1901	modA	1.23268	2.07678	0.752549	0	1	1	no
gene1902	PA1864	0.698705	0	-inf	0	1	1	no
gene1903	PA1865	0	0.196079	inf	0	1	1	no
gene1904	PA1866	0	0.429537	inf	0	1	1	no
gene1905	PA1866a	0	8.21777	inf	0	1	1	no
gene1906	xphA	0	0	0	0	1	1	no
gene1907	xqhA	0.116977	0.180147	0.622953	0	1	1	no
gene1908	PA1869	0	0	0	0	1	1	no
gene1909	PA1870	1.66815	1.8706	0.165253	0	1	1	no
gene191	PA0191	0	0.618128	inf	0	1	1	no
gene1910	lasA	0.474462	0.359233	-0.401371	0	1	1	no
gene1911	PA1872	0.407015	1.90083	2.22347	0	1	1	no
gene1912	PA1873	0	0.555757	inf	0	1	1	no
gene1913	PA1874	0.363615	1.14342	1.65288	0	1	1	no
gene1914	PA1875	0	0.352384	inf	0	1	1	no
gene1915	PA1876	0	0.189081	inf	0	1	1	no
gene1916	PA1877	0.576106	0	-inf	0	1	1	no
gene1917	PA1878	0.823485	0	-inf	0	1	1	no
gene1918	PA1879	0	0	0	0	1	1	no
gene1919	PA1880	0	0.544247	inf	0	1	1	no
gene192	PA0192	0	0.23899	inf	0	1	1	no
gene1920	PA1881	0	0.846453	inf	0	1	1	no
gene1921	PA1882	1.5973	0	-inf	0	1	1	no
gene1922	PA1883	0	0	0	0	1	1	no
gene1923	PA1884	0	0.387884	inf	0	1	1	no
gene1924	PA1885	0	0.813821	inf	0	1	1	no
gene1925	polB	0.115216	0	-inf	0	1	1	no
gene1926	PA1887	0.507557	0.761434	0.585147	0	1	1	no
gene1927	PA1888	0.67654	0	-inf	0	1	1	no
gene1928	PA1889	0	0.283901	inf	0	1	1	no
gene1929	PA1890	0.557874	0.979752	0.812478	0	1	1	no
gene193	PA0193	0	0	0	0	1	1	no
gene1930	PA1891	0	0	0	0	1	1	no
gene1931	PA1892	0.317722	0	-inf	0	1	1	no
gene1932	PA1893	0	0.334942	inf	0	1	1	no
gene1933	PA1894	0.828641	2.57348	1.6349	0	1	1	no
gene1934	PA1895	0.165069	0.781587	2.24334	0	1	1	no
gene1935	PA1896	0	0.473509	inf	0	1	1	no
gene1936	PA1897	0.423385	0.247885	-0.772302	0	1	1	no
gene1937	qscR	0.616762	0.722238	0.22776	0	1	1	no
gene1938	phzA2	0	0	0	0	1	1	no
gene1939	phzB2	0	0.463575	inf	0	1	1	no
gene194	PA0194	0	0.202982	inf	0	1	1	no
gene1940	phzC2	0	0	0	0	1	1	no
gene1941	phzD2	0	0	0	0	1	1	no
gene1942	phzE2	0	0	0	0	1	1	no
gene1943	phzF2	0	0	0	0	1	1	no
gene1944	phzG2	0	0	0	0	1	1	no
gene1945	PA1906	0	0	0	0	1	1	no
gene1946	PA1907	0.124349	0.32878	1.40273	0	1	1	no
gene1947	PA1908	0	0	0	0	1	1	no
gene1948	PA1909	0	0.150824	inf	0	1	1	no
gene1949	femA	0	0	0	0	1	1	no
gene195	pntAA	0.266576	0.880066	1.72306	0	1	1	no
gene1950	femR	0	0	0	0	1	1	no
gene1951	femI	0	0	0	0	1	1	no
gene1952	PA1913	1.20022	0	-inf	0	1	1	no
gene1953	PA1914	0	0.447812	inf	0	1	1	no
gene1954	PA1915	0.183507	0.510407	1.47581	0	1	1	no
gene1955	PA1916	0	0.278633	inf	0	1	1	no
gene1956	PA1917	0	0	0	0	1	1	no
gene1957	PA1918	0.270613	0.393399	0.539764	0	1	1	no
gene1958	nrdG	0.975076	0	-inf	0	1	1	no
gene1959	nrdD	0.17895	0.289295	0.692979	0	1	1	no
gene196	pntAB	0	0	0	0	1	1	no
gene1960	PA1921	0	0	0	0	1	1	no
gene1961	PA1922	0	0	0	0	1	1	no
gene1962	PA1923	0.050016	0.0805031	0.686654	0	1	1	no
gene1963	PA1924	0.823479	0.804614	-0.0334341	0	1	1	no
gene1964	PA1925	3.1384	0	-inf	0	1	1	no
gene1965	PA1926	0.524662	1.24046	1.24142	0	1	1	no
gene1966	metE	0	0.252143	inf	0	1	1	no
gene1967	rimJ	0.89362	0.985503	0.141198	0	1	1	no
gene1968	PA1929	1.27283	0	-inf	0	1	1	no
gene1969	PA1930	0.386648	0.625207	0.693313	0	1	1	no
gene197	pntB	0	0.191067	inf	0	1	1	no
gene1970	PA1931	0	0	0	0	1	1	no
gene1971	PA1932	0	0	0	0	1	1	no
gene1972	PA1933	0.287557	0.404203	0.491233	0	1	1	no
gene1973	PA1934	0	0	0	0	1	1	no
gene1974	PA1937	0	1.01192	inf	0	1	1	no
gene1975	PA1938	0	0	0	0	1	1	no
gene1977	PA1940	0.531696	1.01363	0.930859	0	1	1	no
gene1978	PA1941	0.399072	0.0857613	-2.21825	0	1	1	no
gene1979	PA1942	0	0	0	0	1	1	no
gene198	tonB2	0	0	0	0	1	1	no
gene1980	PA1943	0	0	0	0	1	1	no
gene1981	PA1944	0.522385	1.51683	1.53787	0	1	1	no
gene1982	PA1945	0.287525	0	-inf	0	1	1	no
gene1983	rbsB	2.30335	5.94423	1.36775	0	1	1	no
gene1984	rbsA	0	0.108623	inf	0	1	1	no
gene1985	rbsC	0.305224	0	-inf	0	1	1	no
gene1986	rbsR	0	0.175522	inf	0	1	1	no
gene1987	rbsK	0	0	0	0	1	1	no
gene1988	PA1951	0.470566	0.270234	-0.800187	0	1	1	no
gene1989	PA1952	0	0	0	0	1	1	no
gene199	exbB1	0	1.84954	inf	0	1	1	no
gene1990	PA1953	2.30552	3.64235	0.659776	0	1	1	no
gene1991	PA1954	0	0	0	0	1	1	no
gene1992	PA1955	0	0	0	0	1	1	no
gene1993	PA1956	0	0	0	0	1	1	no
gene1994	PA1957	0	0	0	0	1	1	no
gene1995	PA1958	0	0.365079	inf	0	1	1	no
gene1996	bacA	0.762439	1.6272	1.09369	0	1	1	no
gene1997	PA1960	0	0	0	0	1	1	no
gene1998	PA1961	0	0.704519	inf	0	1	1	no
gene1999	azoR2	0	0.337718	inf	0	1	1	no
gene2	recF	4.54138	7.23994	0.672847	0.584491	0.33035	0.489837	no
gene20	PA0021	0	0	0	0	1	1	no
gene200	exbD1	0	3.12865	inf	0	1	1	no
gene2000	PA1963	6.6712	1.35737	-2.29713	0	1	1	no
gene2001	PA1964	0.476937	0.27131	-0.813853	0	1	1	no
gene2002	PA1965	2.03007	0	-inf	0	1	1	no
gene2003	PA1966	0	0	0	0	1	1	no
gene2004	PA1967	2.80484	0.447001	-2.64957	0	1	1	no
gene2005	PA1968	3.62265	2.37774	-0.607457	0	1	1	no
gene2006	PA1969	0	0	0	0	1	1	no
gene2007	PA1970	0	0	0	0	1	1	no
gene2008	braZ	0.512403	0.517765	0.0150184	0	1	1	no
gene2009	PA1972	0	0.246862	inf	0	1	1	no
gene201	PA0200	125.023	91.6279	-0.448339	-0.607242	0.2855	0.456584	no
gene2010	pqqF	0	0	0	0	1	1	no
gene2011	PA1974	0	0.379242	inf	0	1	1	no
gene2012	PA1975	0	0	0	0	1	1	no
gene2013	ercS'	0.102087	0.0597698	-0.77231	0	1	1	no
gene2014	PA1977	0	0	0	0	1	1	no
gene2015	PA1978	0.362674	0	-inf	0	1	1	no
gene2016	eraS	0	0	0	0	1	1	no
gene2017	eraR	0	0.482158	inf	0	1	1	no
gene2018	PA1981	0	0	0	0	1	1	no
gene2019	exaA	0	0	0	0	1	1	no
gene202	PA0201	0	0.719564	inf	0	1	1	no
gene2020	exaB	0	0	0	0	1	1	no
gene2021	exaC	0	0.109589	inf	0	1	1	no
gene2022	pqqA	0	0	0	0	1	1	no
gene2023	pqqB	0.243499	0.326742	0.424235	0	1	1	no
gene2024	pqqC	0	0	0	0	1	1	no
gene2025	pqqD	0	1.99693	inf	0	1	1	no
gene2026	pqqE	0.259192	0.388368	0.583404	0	1	1	no
gene2027	pqqH	0	0.374336	inf	0	1	1	no
gene2028	PA1991	0.335587	0.24407	-0.459393	0	1	1	no
gene2029	ercS	0.458168	0.309778	-0.564641	0	1	1	no
gene203	PA0202	0	0.17915	inf	0	1	1	no
gene2030	PA1993	0	0	0	0	1	1	no
gene2031	PA1994	0	0	0	0	1	1	no
gene2032	PA1995	0	0	0	0	1	1	no
gene2033	ppiC1	0	0	0	0	1	1	no
gene2034	PA1997	0.327748	0.423962	0.371346	0	1	1	no
gene2035	dhcR	0	0	0	0	1	1	no
gene2036	dhcA	0	0.437812	inf	0	1	1	no
gene2037	dhcB	0	0.304477	inf	0	1	1	no
gene2038	atoB	0	0.146347	inf	0	1	1	no
gene2039	PA2002	0	0.235962	inf	0	1	1	no
gene204	PA0203	0	0.438352	inf	0	1	1	no
gene2040	bdhA	0	0.812678	inf	0	1	1	no
gene2041	PA2004	0.479576	0.242341	-0.984723	0	1	1	no
gene2042	PA2005	0.143165	0.189708	0.406106	0	1	1	no
gene2043	PA2006	0	0.320265	inf	0	1	1	no
gene2044	maiA	0	0.494124	inf	0	1	1	no
gene2045	fahA	0.161599	0	-inf	0	1	1	no
gene2046	hmgA	1.29925	0.875692	-0.569179	0	1	1	no
gene2047	PA2010	0	0	0	0	1	1	no
gene2048	liuE	0.69054	0	-inf	0	1	1	no
gene2049	liuD	0	0.50954	inf	0	1	1	no
gene205	PA0204	0	0	0	0	1	1	no
gene2050	liuC	2.17597	1.0132	-1.10275	0	1	1	no
gene2051	liuB	0.303021	0.657215	1.11695	0	1	1	no
gene2052	liuA	2.09651	2.25748	0.106724	0	1	1	no
gene2053	liuR	50.4416	44.8135	-0.170682	-0.256158	0.64715	0.770517	no
gene2054	PA2017	0.332983	0.194955	-0.772304	0	1	1	no
gene2055	PA2018	0.297558	0.15526	-0.938483	0	1	1	no
gene2056	PA2019	0	0.145055	inf	0	1	1	no
gene2057	PA2020	0	0	0	0	1	1	no
gene2058	PA2021	0	0	0	0	1	1	no
gene2059	PA2022	0	0	0	0	1	1	no
gene206	PA0205	0	0.97229	inf	0	1	1	no
gene2060	galU	9.10113	8.81069	-0.04679	-0.061252	0.94155	0.963389	no
gene2061	PA2024	0	0	0	0	1	1	no
gene2062	gor	8.1537	4.85151	-0.749021	-0.976126	0.08755	0.2268	no
gene2063	PA2026	0	0.178058	inf	0	1	1	no
gene2064	PA2027	2.25202	1.6909	-0.413427	0	1	1	no
gene2065	PA2028	0	0	0	0	1	1	no
gene2066	PA2029	0	0	0	0	1	1	no
gene2067	PA2030	2.57714	1.46117	-0.818646	0	1	1	no
gene2068	PA2031	1.7326	0	-inf	0	1	1	no
gene2069	PA2032	0	0.117981	inf	0	1	1	no
gene207	PA0206	0	0.414479	inf	0	1	1	no
gene2070	PA2033	0	0	0	0	1	1	no
gene2071	PA2034	0	0	0	0	1	1	no
gene2072	PA2035	0.53839	0.763007	0.503045	0	1	1	no
gene2073	PA2036	0	1.54163	inf	0	1	1	no
gene2074	PA2037	6.47158	3.63761	-0.831126	0	1	1	no
gene2075	PA2038	1.13927	0	-inf	0	1	1	no
gene2076	PA2039	0.875714	1.45238	0.729891	0	1	1	no
gene2077	PA2040	0.151264	1.07377	2.82754	0	1	1	no
gene2078	PA2041	1.01086	0.384328	-1.39517	0	1	1	no
gene2079	PA2042	0.553182	0.22873	-1.27411	0	1	1	no
gene208	PA0207	0.250441	1.58906	2.66564	0	1	1	no
gene2080	PA2043	0	0	0	0	1	1	no
gene2081	PA2044	0.450769	1.04931	1.21898	0	1	1	no
gene2082	PA2045	0	0	0	0	1	1	no
gene2084	PA2047	0	0.180668	inf	0	1	1	no
gene2085	PA2048	0	0	0	0	1	1	no
gene2086	PA2049	0	0.0811057	inf	0	1	1	no
gene2087	PA2050	0	0	0	0	1	1	no
gene2088	PA2051	0	0	0	0	1	1	no
gene2089	cynS	0	0.820854	inf	0	1	1	no
gene209	mdcA	0	0.359782	inf	0	1	1	no
gene2090	cynT	0	0	0	0	1	1	no
gene2091	cynR	0.252497	0.545581	1.11153	0	1	1	no
gene2092	PA2055	0	0.118834	inf	0	1	1	no
gene2093	PA2056	0	0	0	0	1	1	no
gene2094	PA2057	0.246729	0.194408	-0.343837	0	1	1	no
gene2095	PA2058	0	0.468778	inf	0	1	1	no
gene2096	PA2059	0	0.255532	inf	0	1	1	no
gene2097	PA2060	0.214608	0	-inf	0	1	1	no
gene2098	PA2061	0.175477	0.205477	0.227692	0	1	1	no
gene2099	PA2062	0	0	0	0	1	1	no
gene21	PA0022	0	0.979588	inf	0	1	1	no
gene210	PA0209	0	0	0	0	1	1	no
gene2100	PA2063	0	0	0	0	1	1	no
gene2101	pcoB	0	0	0	0	1	1	no
gene2102	pcoA	0	0.225331	inf	0	1	1	no
gene2103	PA2066	0.716831	0	-inf	0	1	1	no
gene2104	PA2067	0	0	0	0	1	1	no
gene2105	PA2068	0.335587	0	-inf	0	1	1	no
gene2106	PA2069	0.117686	0	-inf	0	1	1	no
gene2107	PA2070	0.0742225	0.0931896	0.328313	0	1	1	no
gene2108	fusA2	0.396357	1.90723	2.2666	0	1	1	no
gene2109	PA2072	0.075684	0.156064	1.04408	0	1	1	no
gene211	mdcC	0	1.85817	inf	0	1	1	no
gene2110	PA2073	0	0	0	0	1	1	no
gene2111	PA2074	0	0	0	0	1	1	no
gene2112	PA2075	0.122613	0.415884	1.76207	0	1	1	no
gene2113	PA2076	0.742253	0.315418	-1.23465	0	1	1	no
gene2114	PA2077	0	0	0	0	1	1	no
gene2115	PA2078	0	0	0	0	1	1	no
gene2116	PA2079	0.295266	0.741392	1.32822	0	1	1	no
gene2117	kynU	1.58173	0.909216	-0.798808	0	1	1	no
gene2118	kynB	0	0	0	0	1	1	no
gene2119	PA2082	1.92432	1.23651	-0.638076	0	1	1	no
gene212	mdcD	0.364709	0	-inf	0	1	1	no
gene2120	PA2083	0.393966	0.134015	-1.55568	0	1	1	no
gene2121	PA2084	0	0.0890127	inf	0	1	1	no
gene2122	PA2085	0	0	0	0	1	1	no
gene2123	PA2086	0	0	0	0	1	1	no
gene2124	PA2087	0	1.00666	inf	0	1	1	no
gene2125	PA2088	0.266734	0	-inf	0	1	1	no
gene2126	PA2089	0.10184	0.309262	1.60253	0	1	1	no
gene2127	PA2090	0	0	0	0	1	1	no
gene2128	PA2091	0.299212	0	-inf	0	1	1	no
gene2129	PA2092	0	0.225489	inf	0	1	1	no
gene213	mdcE	0	0.232677	inf	0	1	1	no
gene2130	PA2093	1.26659	0	-inf	0	1	1	no
gene2131	PA2094	0	0	0	0	1	1	no
gene2132	PA2095	0.374439	1.14119	1.60773	0	1	1	no
gene2133	PA2096	0	0	0	0	1	1	no
gene2134	PA2097	0	0.113369	inf	0	1	1	no
gene2135	PA2098	0	0	0	0	1	1	no
gene2136	PA2099	0	0	0	0	1	1	no
gene2137	PA2100	1.52739	4.21579	1.46473	0	1	1	no
gene2138	PA2101	6.35104	5.02681	-0.337348	0	1	1	no
gene2139	PA2102	1.17004	5.13769	2.13457	0	1	1	no
gene214	PA0213	0	0	0	0	1	1	no
gene2140	PA2103	0.431283	4.14814	3.26576	0	1	1	no
gene2141	PA2104	0	2.7829	inf	0	1	1	no
gene2142	PA2105	0.481467	1.0041	1.06039	0	1	1	no
gene2143	PA2106	1.68047	0.672159	-1.32199	0	1	1	no
gene2144	PA2107	0	1.08046	inf	0	1	1	no
gene2145	PA2108	0	0	0	0	1	1	no
gene2146	PA2109	0	0	0	0	1	1	no
gene2147	PA2110	0	0	0	0	1	1	no
gene2148	PA2111	0	0	0	0	1	1	no
gene2149	PA2112	0.314473	0	-inf	0	1	1	no
gene215	PA0214	0	0	0	0	1	1	no
gene2150	opdO	0	0.139712	inf	0	1	1	no
gene2151	PA2114	0	0.268761	inf	0	1	1	no
gene2152	PA2115	0	0	0	0	1	1	no
gene2153	PA2116	0.403118	0	-inf	0	1	1	no
gene2154	PA2117	0	0	0	0	1	1	no
gene2155	ada	0	0	0	0	1	1	no
gene2156	PA2118a	0	1.66481	inf	0	1	1	no
gene2157	PA2119	0.944981	0.508858	-0.893023	0	1	1	no
gene2158	PA2120	0	0	0	0	1	1	no
gene2159	PA2121	0	1.23222	inf	0	1	1	no
gene216	PA0215	0	0	0	0	1	1	no
gene2160	PA2122	0	0.391992	inf	0	1	1	no
gene2161	PA2123	0	0.194188	inf	0	1	1	no
gene2162	PA2124	0	0.25798	inf	0	1	1	no
gene2163	PA2125	0.197726	0.115765	-0.772308	0	1	1	no
gene2164	PA2126	0.721508	0.318189	-1.18113	0	1	1	no
gene2165	PA2127	4.45042	6.81056	0.613833	0	1	1	no
gene2166	cupA1	0	0.387884	inf	0	1	1	no
gene2167	cupA2	0.438829	0	-inf	0	1	1	no
gene2168	cupA3	0	0.19695	inf	0	1	1	no
gene2169	cupA4	0.212173	0.599997	1.49971	0	1	1	no
gene217	PA0216	0.303605	0.249137	-0.285256	0	1	1	no
gene2170	cupA5	0	0	0	0	1	1	no
gene2171	PA2133	0	0	0	0	1	1	no
gene2172	PA2134	0	0	0	0	1	1	no
gene2173	PA2135	0.278812	0	-inf	0	1	1	no
gene2174	PA2136	0	0	0	0	1	1	no
gene2175	PA2137	0	0	0	0	1	1	no
gene2176	PA2138	0.24862	0.200459	-0.310638	0	1	1	no
gene2178	PA2140	0	0	0	0	1	1	no
gene2179	PA2141	0	0	0	0	1	1	no
gene218	PA0217	0.665966	4.77466	2.84188	0	1	1	no
gene2180	PA2142	0	0	0	0	1	1	no
gene2181	PA2142a	0	0	0	0	1	1	no
gene2182	PA2143	0	0	0	0	1	1	no
gene2183	glgP	0.111406	0.643094	2.52921	0	1	1	no
gene2184	PA2145	0	0	0	0	1	1	no
gene2185	PA2146	0	0	0	0	1	1	no
gene2186	katE	0	0.123168	inf	0	1	1	no
gene2187	PA2148	0	0	0	0	1	1	no
gene2188	PA2149	0	0	0	0	1	1	no
gene2189	PA2150	0	0.550222	inf	0	1	1	no
gene219	PA0218	0.445182	0.521393	0.227975	0	1	1	no
gene2190	PA2151	0	0.339774	inf	0	1	1	no
gene2191	PA2152	0.13932	0.150445	0.110837	0	1	1	no
gene2192	glgB	0	0	0	0	1	1	no
gene2193	PA2154	0	0.179353	inf	0	1	1	no
gene2194	PA2155	0	0.23408	inf	0	1	1	no
gene2195	PA2156	0	0.261007	inf	0	1	1	no
gene2196	PA2157	0	0	0	0	1	1	no
gene2197	PA2158	0	0	0	0	1	1	no
gene2198	PA2159	0	0.595045	inf	0	1	1	no
gene2199	PA2160	0.0925391	0.0747146	-0.308674	0	1	1	no
gene22	qor	0.951482	0.953679	0.00332682	0	1	1	no
gene220	PA0219	0	0	0	0	1	1	no
gene2200	PA2161	0	0	0	0	1	1	no
gene2201	PA2162	0.0968061	0.0882579	-0.133372	0	1	1	no
gene2202	PA2163	0	0	0	0	1	1	no
gene2203	PA2164	0.115693	0	-inf	0	1	1	no
gene2204	PA2165	0	0.352676	inf	0	1	1	no
gene2205	PA2166	0	0	0	0	1	1	no
gene2206	PA2167	0	0.421227	inf	0	1	1	no
gene2207	PA2168	0	0	0	0	1	1	no
gene2208	PA2169	0	0	0	0	1	1	no
gene2209	PA2170	0	0	0	0	1	1	no
gene221	PA0220	0.263509	0.374084	0.505513	0	1	1	no
gene2210	PA2171	0	4.06195	inf	0	1	1	no
gene2211	PA2172	0	0.594365	inf	0	1	1	no
gene2212	PA2173	0	0	0	0	1	1	no
gene2213	PA2173a	0	0	0	0	1	1	no
gene2214	PA2174	0	1.74856	inf	0	1	1	no
gene2215	PA2175	0	0	0	0	1	1	no
gene2216	PA2176	0	0	0	0	1	1	no
gene2217	PA2177	0.303238	0.426215	0.491131	0	1	1	no
gene2218	PA2178	0.408348	0.337718	-0.273981	0	1	1	no
gene2219	PA2179	0.324015	0	-inf	0	1	1	no
gene222	PA0221	0.274651	0.589542	1.10199	0	1	1	no
gene2220	PA2180	0.209533	0	-inf	0	1	1	no
gene2221	PA2181	0	0	0	0	1	1	no
gene2222	PA2182	0	1.32576	inf	0	1	1	no
gene2223	PA2183	0	0	0	0	1	1	no
gene2224	PA2184	0	1.79942	inf	0	1	1	no
gene2225	katN	0	0	0	0	1	1	no
gene2226	PA2187	4.95039	17.0601	1.78501	1.51323	0.1512	0.315525	no
gene2227	PA2188	0	0.231616	inf	0	1	1	no
gene2228	PA2189	0.875522	0	-inf	0	1	1	no
gene2229	PA2190	1.41848	6.96954	2.29671	0.834711	0.3004	0.470157	no
gene223	PA0222	0	0	0	0	1	1	no
gene2230	exoY	2.44802	2.68254	0.131989	0	1	1	no
gene2231	PA2192	0	0.947662	inf	0	1	1	no
gene2232	hcnA	0	0	0	0	1	1	no
gene2233	hcnB	2.80295	0.241746	-3.53538	0	1	1	no
gene2234	hcnC	0.644005	0	-inf	0	1	1	no
gene2235	PA2196	0.811422	1.74338	1.10336	0	1	1	no
gene2236	PA2197	0	0	0	0	1	1	no
gene2237	PA2198	1.41848	9.43911	2.7343	1.03064	0.0962	0.241777	no
gene2238	PA2199	1.23042	1.53756	0.321483	0	1	1	no
gene2239	PA2200	0.177325	0	-inf	0	1	1	no
gene224	PA0223	0.825279	4.6997	2.50961	0	1	1	no
gene2240	PA2201	0	0	0	0	1	1	no
gene2241	PA2202	0	0	0	0	1	1	no
gene2242	PA2203	0	0	0	0	1	1	no
gene2243	PA2204	2.82653	0.746217	-1.92137	0	1	1	no
gene2244	PA2205	0.575775	0	-inf	0	1	1	no
gene2245	PA2206	0.558603	0.297095	-0.910898	0	1	1	no
gene2246	PA2207	0	0.109589	inf	0	1	1	no
gene2247	PA2208	0	1.36522	inf	0	1	1	no
gene2248	PA2209	1.2866	1.13625	-0.179283	0	1	1	no
gene2249	PA2210	0.376653	0	-inf	0	1	1	no
gene225	PA0224	0	0	0	0	1	1	no
gene2250	PA2211	0	0	0	0	1	1	no
gene2251	PA2212	0.299792	0.287961	-0.0580847	0	1	1	no
gene2252	PA2213	0	0.136994	inf	0	1	1	no
gene2253	PA2214	0	0	0	0	1	1	no
gene2254	PA2215	0.502905	0.470666	-0.0955823	0	1	1	no
gene2255	PA2216	0	0.294313	inf	0	1	1	no
gene2256	PA2217	0	0.104702	inf	0	1	1	no
gene2257	PA2218	0	0.247295	inf	0	1	1	no
gene2258	opdE	0	0.142539	inf	0	1	1	no
gene2259	PA2220	0.241586	3.84575	3.99265	0	1	1	no
gene226	PA0225	0.481667	1.86685	1.9545	0	1	1	no
gene2260	PA2221	0	2.37718	inf	0	1	1	no
gene2261	PA2222	0	1.27977	inf	0	1	1	no
gene2262	PA2223	1.24835	3.21397	1.36433	0	1	1	no
gene2263	PA2224	6.42561	9.10677	0.503105	0.557986	0.3139	0.480035	no
gene2264	PA2225	0	0	0	0	1	1	no
gene2265	PA2226	0.535928	1.19249	1.15386	0	1	1	no
gene2266	vqsM	5.25511	7.8787	0.584238	0.719634	0.22735	0.393768	no
gene2267	PA2228	1.39815	3.82377	1.45148	0	1	1	no
gene2268	PA2229	0	0.539132	inf	0	1	1	no
gene2269	PA2230	0	0	0	0	1	1	no
gene227	PA0226	1.76413	1.25291	-0.493676	0	1	1	no
gene2270	pslA	2.72731	4.17001	0.612571	0	1	1	no
gene2271	pslB	0.538507	0.29206	-0.882699	0	1	1	no
gene2272	pslC	0.6951	0.199693	-1.79944	0	1	1	no
gene2273	pslD	0.601274	1.01681	0.757953	0	1	1	no
gene2274	pslE	6.65557	11.4475	0.782403	1.28541	0.02705	0.097934	no
gene2275	pslF	0.179002	1.51209	3.0785	0	1	1	no
gene2276	pslG	0.629844	0.754836	0.26117	0	1	1	no
gene2277	pslH	0	0.364762	inf	0	1	1	no
gene2278	pslI	0	0	0	0	1	1	no
gene2279	pslJ	0.343772	0.373194	0.118471	0	1	1	no
gene228	PA0227	0.413003	0.619308	0.584505	0	1	1	no
gene2280	pslK	0	0.597047	inf	0	1	1	no
gene2281	pslL	1.91473	0.936689	-1.0315	0	1	1	no
gene2282	pslM	0	0.249204	inf	0	1	1	no
gene2283	pslN	0	0.178058	inf	0	1	1	no
gene2284	bkdR	0.603792	0	-inf	0	1	1	no
gene2285	bkdA1	1.06616	1.37547	0.367507	0	1	1	no
gene2286	bkdA2	0.492513	0.704489	0.516415	0	1	1	no
gene2287	bkdB	0.625034	0.423612	-0.56119	0	1	1	no
gene2288	lpdV	0	0.551008	inf	0	1	1	no
gene2289	PA2251	0	0.813186	inf	0	1	1	no
gene229	pcaF	0	0	0	0	1	1	no
gene2290	PA2252	0.825877	1.72313	1.06104	0	1	1	no
gene2291	ansA	0	0	0	0	1	1	no
gene2292	pvcA	0	0	0	0	1	1	no
gene2293	pvcB	0	0	0	0	1	1	no
gene2294	pvcC	0	0	0	0	1	1	no
gene2295	pvcD	0	0	0	0	1	1	no
gene2296	ptxR	0	0	0	0	1	1	no
gene2297	ptxS	0.604633	0.284887	-1.08567	0	1	1	no
gene2298	PA2260	0	0	0	0	1	1	no
gene2299	PA2261	0	0	0	0	1	1	no
gene23	hemF	4.39206	5.95529	0.439274	0	1	1	no
gene230	pcaT	0	0.34579	inf	0	1	1	no
gene2300	PA2262	0	0.34304	inf	0	1	1	no
gene2301	PA2263	0	0	0	0	1	1	no
gene2302	PA2264	0	0.447183	inf	0	1	1	no
gene2303	PA2265	1.27199	1.41087	0.149487	0	1	1	no
gene2304	PA2266	0.289788	0	-inf	0	1	1	no
gene2305	PA2267	0.46002	0.334943	-0.457778	0	1	1	no
gene2306	PA2268	0	0	0	0	1	1	no
gene2307	PA2269	0.17593	0.285904	0.700533	0	1	1	no
gene2308	PA2270	0	0.583754	inf	0	1	1	no
gene2309	PA2271	0	0.712681	inf	0	1	1	no
gene231	pcaB	0	0.200141	inf	0	1	1	no
gene2310	pbpC	0	0.908986	inf	0	1	1	no
gene2311	soxR	0	1.59094	inf	0	1	1	no
gene2312	PA2274	0	0	0	0	1	1	no
gene2313	PA2275	0	0	0	0	1	1	no
gene2314	PA2276	0.502929	0.526212	0.0652884	0	1	1	no
gene2315	arsR	0	0	0	0	1	1	no
gene2316	arsB	0	0.132931	inf	0	1	1	no
gene2317	arsC	0	0.770085	inf	0	1	1	no
gene2318	PA2280	0	0.283506	inf	0	1	1	no
gene2319	PA2281	0	0.55397	inf	0	1	1	no
gene232	pcaD	0	1.4997	inf	0	1	1	no
gene2320	PA2282	0	0	0	0	1	1	no
gene2321	PA2283	0	0.17915	inf	0	1	1	no
gene2322	PA2284	0	0	0	0	1	1	no
gene2323	PA2285	0.364823	0.300771	-0.278533	0	1	1	no
gene2324	PA2286	0	0.283625	inf	0	1	1	no
gene2325	PA2287	0.385368	0	-inf	0	1	1	no
gene2326	PA2288	0	0	0	0	1	1	no
gene2327	PA2289	1.51266	1.65451	0.129315	0	1	1	no
gene2328	gcd	0.767388	0.582067	-0.39877	0	1	1	no
gene2329	PA2291	0.826829	0.531949	-0.636301	0	1	1	no
gene233	pcaC	2.208	1.62744	-0.440138	0	1	1	no
gene2330	PA2292	0	0	0	0	1	1	no
gene2331	PA2293	0	0	0	0	1	1	no
gene2332	PA2294	0	0	0	0	1	1	no
gene2333	PA2295	0.287967	0.368437	0.355514	0	1	1	no
gene2334	PA2296	0	0.195738	inf	0	1	1	no
gene2335	PA2297	0	0	0	0	1	1	no
gene2336	PA2298	0.611949	0.684576	0.1618	0	1	1	no
gene2337	PA2299	3.63794	7.5683	1.05685	0.922944	0.1567	0.319243	no
gene2338	chiC	0	0.599791	inf	0	1	1	no
gene2339	PA2301	0	0	0	0	1	1	no
gene234	PA0233	0.655597	0.598828	-0.130668	0	1	1	no
gene2340	ambE	0.166233	0.160677	-0.0490423	0	1	1	no
gene2341	ambD	0.641585	0.285905	-1.16611	0	1	1	no
gene2342	ambC	0.275291	0	-inf	0	1	1	no
gene2343	ambB	0	0.0672786	inf	0	1	1	no
gene2344	ambA	0.565341	0	-inf	0	1	1	no
gene2345	PA2307	0	0.21261	inf	0	1	1	no
gene2346	PA2308	0	0	0	0	1	1	no
gene2347	PA2309	0	0.27087	inf	0	1	1	no
gene2348	PA2310	0	0	0	0	1	1	no
gene2349	PA2311	0	0	0	0	1	1	no
gene235	PA0234	0.653866	2.19875	1.74962	0	1	1	no
gene2350	PA2312	0	0.359782	inf	0	1	1	no
gene2351	PA2312a	1.54232	1.87601	0.282562	0	1	1	no
gene2352	PA2314	0.233337	0.136615	-0.772307	0	1	1	no
gene2353	PA2315	0	0.376757	inf	0	1	1	no
gene2354	PA2316	1.04871	0.336351	-1.64058	0	1	1	no
gene2355	PA2317	0.904863	1.79207	0.985857	0	1	1	no
gene2356	PA2318	0	0	0	0	1	1	no
gene2357	PA2319	0	0	0	0	1	1	no
gene2358	gntR	0	0.171852	inf	0	1	1	no
gene2359	PA2321	0.505291	0	-inf	0	1	1	no
gene236	pcaK	0	0.2058	inf	0	1	1	no
gene2360	PA2322	0	0.525013	inf	0	1	1	no
gene2361	PA2323	0.772241	0.369453	-1.06366	0	1	1	no
gene2362	PA2324	0	0	0	0	1	1	no
gene2363	PA2325	0	0	0	0	1	1	no
gene2364	PA2326	0.203951	0.372207	0.867882	0	1	1	no
gene2365	PA2327	0	0.410506	inf	0	1	1	no
gene2366	PA2328	0	0	0	0	1	1	no
gene2367	PA2329	0	0.365527	inf	0	1	1	no
gene2368	PA2330	0	0	0	0	1	1	no
gene2369	PA2331	0	0	0	0	1	1	no
gene237	PA0236	0	0	0	0	1	1	no
gene2370	PA2332	0	0.644918	inf	0	1	1	no
gene2371	PA2333	0	0.167135	inf	0	1	1	no
gene2372	PA2334	0	0.527774	inf	0	1	1	no
gene2373	PA2335	0	0	0	0	1	1	no
gene2374	PA2336	0	0.197101	inf	0	1	1	no
gene2375	mtlR	0	0	0	0	1	1	no
gene2376	PA2338	0.221668	2.06985	3.22306	0	1	1	no
gene2377	PA2339	1.24549	1.20446	-0.0483254	0	1	1	no
gene2378	PA2340	0	1.85868	inf	0	1	1	no
gene2379	PA2341	0	0	0	0	1	1	no
gene238	PA0237	0	0.169489	inf	0	1	1	no
gene2380	mtlD	0	0.176675	inf	0	1	1	no
gene2381	mtlY	0	0	0	0	1	1	no
gene2382	mtlZ	0	0	0	0	1	1	no
gene2383	PA2345	0	0	0	0	1	1	no
gene2384	PA2346	0	0	0	0	1	1	no
gene2385	PA2347	0	0	0	0	1	1	no
gene2386	PA2348	0	0	0	0	1	1	no
gene2387	PA2349	0	0.627639	inf	0	1	1	no
gene2388	PA2350	0	1.15294	inf	0	1	1	no
gene2389	PA2351	0.371425	0.506506	0.447509	0	1	1	no
gene239	PA0238	0	0.229429	inf	0	1	1	no
gene2390	PA2352	0	0	0	0	1	1	no
gene2391	PA2353	0.441744	0.150364	-1.55475	0	1	1	no
gene2392	PA2354	0.263243	0.54857	1.05928	0	1	1	no
gene2393	PA2355	0	0	0	0	1	1	no
gene2394	msuD	0	0	0	0	1	1	no
gene2395	msuE	0	0	0	0	1	1	no
gene2396	PA2358	0	0	0	0	1	1	no
gene2397	PA2359	1.94303	1.6621	-0.225296	0	1	1	no
gene2398	PA2360	0	0	0	0	1	1	no
gene2399	PA2361	0.191879	1.02642	2.41935	0	1	1	no
gene24	aroE	0.511127	0.22627	-1.17563	0	1	1	no
gene240	PA0239	0.471814	2.33528	2.30731	0	1	1	no
gene2400	PA2362	0	0	0	0	1	1	no
gene2401	PA2363	0.573556	0	-inf	0	1	1	no
gene2402	PA2364	0	0	0	0	1	1	no
gene2403	PA2365	0	0	0	0	1	1	no
gene2404	PA2366	0.748146	0.719004	-0.0573201	0	1	1	no
gene2405	PA2367	0.771251	2.12087	1.45938	0	1	1	no
gene2406	PA2368	0	0	0	0	1	1	no
gene2407	PA2369	0.112724	0.381968	1.76065	0	1	1	no
gene2408	PA2370	0	0	0	0	1	1	no
gene2409	PA2371	0	0	0	0	1	1	no
gene241	PA0240	0	0	0	0	1	1	no
gene2410	PA2373	0.0997434	0.543635	2.44635	0	1	1	no
gene2411	PA2374	0	0	0	0	1	1	no
gene2412	PA2375	0	0	0	0	1	1	no
gene2413	PA2376	0	0	0	0	1	1	no
gene2414	PA2377	0	0.846059	inf	0	1	1	no
gene2415	PA2378	1.05337	0.853509	-0.303528	0	1	1	no
gene2416	PA2379	0	0.490804	inf	0	1	1	no
gene2417	PA2380	0	3.17105	inf	0	1	1	no
gene2418	PA2381	2.96575	0	-inf	0	1	1	no
gene2419	lldA	0.679434	0.150824	-2.17147	0	1	1	no
gene242	PA0241	0.218788	0.675335	1.62607	0	1	1	no
gene2420	PA2383	0.241586	0	-inf	0	1	1	no
gene2421	PA2384	0	0	0	0	1	1	no
gene2422	pvdQ	0	0.178628	inf	0	1	1	no
gene2423	pvdA	0.688833	1.04428	0.600283	0	1	1	no
gene2424	fpvI	0	3.674	inf	0	1	1	no
gene2425	fpvR	0	0.179353	inf	0	1	1	no
gene2426	pvdR	0	0	0	0	1	1	no
gene2427	pvdT	0	0.379642	inf	0	1	1	no
gene2428	opmQ	0	0	0	0	1	1	no
gene2429	pvdP	0.227183	0.157456	-0.52891	0	1	1	no
gene243	PA0242	0	0.544276	inf	0	1	1	no
gene2430	PA2393	0	0.392187	inf	0	1	1	no
gene2431	pvdN	0	0.473079	inf	0	1	1	no
gene2432	pvdO	0	0	0	0	1	1	no
gene2433	pvdF	0	0	0	0	1	1	no
gene2434	pvdE	0.170849	1.34621	2.97811	0	1	1	no
gene2435	fpvA	3.32359	3.7102	0.158754	0	1	1	no
gene2436	pvdD	0.203142	0.717991	1.82148	0	1	1	no
gene2437	pvdJ	0.0292073	0.805056	4.78469	0	1	1	no
gene2438	PA2402	0.159806	0.377595	1.24052	0	1	1	no
gene2439	PA2403	0.562779	1.18172	1.07024	0	1	1	no
gene244	PA0243	0	1.27918	inf	0	1	1	no
gene2440	PA2404	2.81347	0.40037	-2.81294	0	1	1	no
gene2441	PA2405	0	0	0	0	1	1	no
gene2442	PA2406	0	0	0	0	1	1	no
gene2443	PA2407	0	0	0	0	1	1	no
gene2444	PA2408	0	0	0	0	1	1	no
gene2445	PA2409	0	0.628252	inf	0	1	1	no
gene2446	PA2410	0.785319	0.523503	-0.585081	0	1	1	no
gene2447	PA2411	0	0.659643	inf	0	1	1	no
gene2448	PA2412	0	0	0	0	1	1	no
gene2449	pvdH	0	0.19526	inf	0	1	1	no
gene245	PA0244	0	0	0	0	1	1	no
gene2450	PA2414	0.378611	2.49008	2.7174	0	1	1	no
gene2451	PA2415	0	0	0	0	1	1	no
gene2452	treA	0.226717	0.329456	0.539195	0	1	1	no
gene2453	PA2417	0.869334	1.00234	0.205388	0	1	1	no
gene2454	PA2418	0	0.352647	inf	0	1	1	no
gene2455	PA2419	1.15276	2.64767	1.19963	0	1	1	no
gene2456	PA2420	0	0.31239	inf	0	1	1	no
gene2457	PA2421	0.33698	0	-inf	0	1	1	no
gene2458	PA2422	0	1.5546	inf	0	1	1	no
gene2459	PA2423	0	0	0	0	1	1	no
gene246	aroQ2	0	0	0	0	1	1	no
gene2460	pvdL	0.0339818	0.0905912	1.41461	0	1	1	no
gene2461	pvdG	0	0.249137	inf	0	1	1	no
gene2462	pvdS	1.09607	0.624505	-0.811558	0	1	1	no
gene2463	PA2427	0	0	0	0	1	1	no
gene2464	PA2428	0	0.52563	inf	0	1	1	no
gene2465	PA2429	0	0	0	0	1	1	no
gene2466	PA2430	0.303028	0	-inf	0	1	1	no
gene2467	PA2431	0.165785	0	-inf	0	1	1	no
gene2468	bexR	0.243499	0.198888	-0.291963	0	1	1	no
gene2469	PA2433	0	2.33462	inf	0	1	1	no
gene247	PA0246	0.704641	0.686285	-0.038082	0	1	1	no
gene2470	PA2434	0	0	0	0	1	1	no
gene2471	PA2435	0.139216	0.289982	1.05864	0	1	1	no
gene2472	PA2436	1.61359	1.74742	0.114947	0	1	1	no
gene2473	PA2437	0	0	0	0	1	1	no
gene2474	PA2438	0	0	0	0	1	1	no
gene2475	PA2439	0	0	0	0	1	1	no
gene2476	PA2440	0	0	0	0	1	1	no
gene2477	PA2441	0	0.209895	inf	0	1	1	no
gene2478	gcvT2	0.350501	0.254951	-0.4592	0	1	1	no
gene2479	sdaA	0.695091	0.514527	-0.433957	0	1	1	no
gene248	pobA	0	0.384884	inf	0	1	1	no
gene2480	glyA2	0	0	0	0	1	1	no
gene2481	gcvP2	0.499389	0	-inf	0	1	1	no
gene2482	gcvH2	0	0	0	0	1	1	no
gene2483	PA2447	0	0	0	0	1	1	no
gene2484	PA2448	0	0.153663	inf	0	1	1	no
gene2485	PA2449	1.5029	1.6487	0.133582	0	1	1	no
gene2486	PA2450	0	0.325414	inf	0	1	1	no
gene2488	PA2453	3.71715	9.83527	1.40377	0	1	1	no
gene2489	PA2454	1.61809	0.773711	-1.06442	0	1	1	no
gene249	PA0248	0.259969	0.42522	0.709872	0	1	1	no
gene2490	PA2455	0	0	0	0	1	1	no
gene2491	PA2457	7.71174	5.13789	-0.58588	-0.694791	0.21235	0.380812	no
gene2492	PA2458	0	0.155583	inf	0	1	1	no
gene2493	PA2459	29.9387	18.3153	-0.708962	-1.10254	0.0573	0.164416	no
gene2494	PA2460	65.5053	57.4749	-0.188679	-0.277387	0.6268	0.750412	no
gene2495	PA2461	31.065	22.6205	-0.457656	-0.639039	0.26175	0.429871	no
gene2496	PA2462	3.47853	1.19951	-1.53604	0	1	1	no
gene2497	PA2463	1.92913	0.722486	-1.41691	0	1	1	no
gene2498	PA2464	0	0	0	0	1	1	no
gene2499	PA2465	0	0.235889	inf	0	1	1	no
gene25	plcB	1.75882	1.05938	-0.731392	0	1	1	no
gene250	PA0249	0	0	0	0	1	1	no
gene2500	foxA	0.190256	0.43532	1.19414	0	1	1	no
gene2501	foxR	0	0	0	0	1	1	no
gene2502	foxI	0	0	0	0	1	1	no
gene2503	PA2469	0.486998	0.52563	0.11013	0	1	1	no
gene2504	gtdA	0.374261	0.166063	-1.17231	0	1	1	no
gene2505	PA2471	0	0	0	0	1	1	no
gene2506	PA2472	0	0.125808	inf	0	1	1	no
gene2507	PA2473	0	0	0	0	1	1	no
gene2508	PA2474	0	0.511268	inf	0	1	1	no
gene2509	PA2475	0	0.127105	inf	0	1	1	no
gene251	PA0250	1.27678	0.873709	-0.54728	0	1	1	no
gene2510	dsbG	0.978854	1.58284	0.693352	0	1	1	no
gene2511	PA2477	0	0.346786	inf	0	1	1	no
gene2512	PA2478	0	0.092869	inf	0	1	1	no
gene2513	PA2479	0	0	0	0	1	1	no
gene2514	PA2480	0	0	0	0	1	1	no
gene2515	PA2481	0.256713	0.655075	1.3515	0	1	1	no
gene2516	PA2482	1.96046	1.7042	-0.202104	0	1	1	no
gene2517	PA2483	0.401478	2.76361	2.78316	0	1	1	no
gene2518	PA2484	0	0.520885	inf	0	1	1	no
gene2519	PA2485	0	1.23868	inf	0	1	1	no
gene252	PA0251	0	0.314149	inf	0	1	1	no
gene2521	PA2487	0	0	0	0	1	1	no
gene2522	PA2488	0	1.15792	inf	0	1	1	no
gene2523	PA2489	0	0.755187	inf	0	1	1	no
gene2524	PA2490	0	0	0	0	1	1	no
gene2525	PA2491	2.66433	1.38056	-0.948519	0	1	1	no
gene2526	mexT	0.382031	0	-inf	0	1	1	no
gene2527	mexE	0	0.225509	inf	0	1	1	no
gene2528	mexF	0.12171	0.174347	0.518511	0	1	1	no
gene2529	oprN	0	0.184759	inf	0	1	1	no
gene253	PA0252	0	0	0	0	1	1	no
gene2530	PA2496	0	0.670242	inf	0	1	1	no
gene2531	PA2497	0	0	0	0	1	1	no
gene2532	PA2498	0	0	0	0	1	1	no
gene2533	PA2499	0.883135	0.864408	-0.0309218	0	1	1	no
gene2534	PA2500	0.344952	0.498643	0.531614	0	1	1	no
gene2535	PA2501	0	0	0	0	1	1	no
gene2536	PA2502	0	0.805235	inf	0	1	1	no
gene2537	PA2503	0.16823	0.136615	-0.30032	0	1	1	no
gene2538	PA2504	0	0	0	0	1	1	no
gene2539	opdT	0	0.196093	inf	0	1	1	no
gene254	PA0253	0	0	0	0	1	1	no
gene2540	PA2506	0	0	0	0	1	1	no
gene2541	catA	0	0	0	0	1	1	no
gene2542	catC	0	0	0	0	1	1	no
gene2543	catB	0.191249	0	-inf	0	1	1	no
gene2544	catR	0	0	0	0	1	1	no
gene2545	PA2511	0	0	0	0	1	1	no
gene2546	antA	0.206451	0.309262	0.583027	0	1	1	no
gene2547	antB	1.57099	34.3088	4.44883	2.91861	0.1328	0.295603	no
gene2548	antC	0.391513	0.284887	-0.458668	0	1	1	no
gene2549	xylL	0	0	0	0	1	1	no
gene255	PA0254	0	0	0	0	1	1	no
gene2550	xylZ	0	0.175522	inf	0	1	1	no
gene2551	xylY	0	0	0	0	1	1	no
gene2552	xylX	0.363498	3.45271	3.24771	0	1	1	no
gene2553	xylS	0	0.188256	inf	0	1	1	no
gene2554	czcA	0	0.365293	inf	0	1	1	no
gene2555	czcB	0.142172	0.115224	-0.303201	0	1	1	no
gene2556	czcC	0	0	0	0	1	1	no
gene2557	PA2523	0	0.293622	inf	0	1	1	no
gene2558	PA2524	0.40496	0.193842	-1.0629	0	1	1	no
gene2559	PA2525	0.27543	0.182363	-0.594873	0	1	1	no
gene256	PA0255	0	0.734832	inf	0	1	1	no
gene2560	PA2526	0.171878	0.497414	1.53306	0	1	1	no
gene2561	PA2527	0.209372	0.608772	1.53984	0	1	1	no
gene2562	PA2528	0.464212	0.985118	1.08551	0	1	1	no
gene2563	PA2529	0	0.799888	inf	0	1	1	no
gene2564	PA2530	0	0	0	0	1	1	no
gene2565	PA2531	0	0	0	0	1	1	no
gene2566	tpx	0	0.752407	inf	0	1	1	no
gene2567	PA2533	2.06784	1.02831	-1.00786	0	1	1	no
gene2568	PA2534	0	0.199693	inf	0	1	1	no
gene2569	PA2535	0.219982	0.27976	0.346806	0	1	1	no
gene257	PA0256	1.57716	2.44824	0.634421	0	1	1	no
gene2570	PA2536	0.673317	0.921206	0.452238	0	1	1	no
gene2571	PA2537	1.12129	0.826166	-0.440663	0	1	1	no
gene2572	PA2538	0	0.873669	inf	0	1	1	no
gene2573	PA2539	0	0.331208	inf	0	1	1	no
gene2574	PA2540	0.857426	0.431046	-0.99217	0	1	1	no
gene2575	PA2541	0.543515	0	-inf	0	1	1	no
gene2576	PA2542	0.157746	0.261768	0.730689	0	1	1	no
gene2577	PA2543	0.11657	0.0942898	-0.306027	0	1	1	no
gene2578	PA2544	0	0.425673	inf	0	1	1	no
gene2579	xthA	0	0	0	0	1	1	no
gene258	PA0257	1.10472	2.96735	1.4255	0	1	1	no
gene2580	PA2546	0	0	0	0	1	1	no
gene2581	PA2547	0	0	0	0	1	1	no
gene2582	PA2548	0.149064	0.386059	1.37289	0	1	1	no
gene2583	PA2549	0.289486	0.711789	1.29796	0	1	1	no
gene2584	PA2550	0.314555	0.217806	-0.530266	0	1	1	no
gene2585	PA2551	0	0.582563	inf	0	1	1	no
gene2586	PA2552	0	0.395685	inf	0	1	1	no
gene2587	PA2553	0	0.145055	inf	0	1	1	no
gene2588	PA2554	0	0	0	0	1	1	no
gene2589	PA2555	0.735231	0.970923	0.401158	0	1	1	no
gene259	PA0258	0	0	0	0	1	1	no
gene2590	PA2556	0	0.426786	inf	0	1	1	no
gene2591	PA2557	0.458168	0.669742	0.547729	0	1	1	no
gene2592	PA2558	0	0	0	0	1	1	no
gene2593	PA2559	6.94017	6.90281	-0.00778721	0	1	1	no
gene2594	PA2559a	0	0	0	0	1	1	no
gene2596	PA2561	0	0	0	0	1	1	no
gene2597	PA2562	0	0	0	0	1	1	no
gene2598	PA2563	0.522385	1.57499	1.59216	0	1	1	no
gene2599	PA2564	0.550172	0.370602	-0.57001	0	1	1	no
gene26	PA0027	0	0.206658	inf	0	1	1	no
gene260	PA0259	2.0056	1.95095	-0.0398631	0	1	1	no
gene2600	PA2565	0	0	0	0	1	1	no
gene2601	PA2566	0	0.145483	inf	0	1	1	no
gene2602	PA2567	2.17105	0.785301	-1.46707	0	1	1	no
gene2603	PA2568	1.78866	1.03977	-0.78262	0	1	1	no
gene2604	PA2569	23.3057	17.4155	-0.42031	-0.429264	0.4446	0.584407	no
gene2605	lecA	0	6.0821	inf	0	1	1	no
gene2606	PA2570.1	0	0	0	0	1	1	no
gene2607	PA2571	0.203459	1.30389	2.68002	0	1	1	no
gene2608	PA2572	0.21543	0.912514	2.08263	0	1	1	no
gene2609	PA2573	0.830552	1.4054	0.758843	0	1	1	no
gene261	PA0260	9.52026	7.62391	-0.32047	-0.571788	0.32445	0.488538	no
gene2610	alkB1	0.258397	0.955514	1.88669	0	1	1	no
gene2611	PA2575	5.5282	2.83644	-0.962729	0	1	1	no
gene2612	PA2576	0.458111	0	-inf	0	1	1	no
gene2613	PA2577	0	0	0	0	1	1	no
gene2614	PA2578	0	0	0	0	1	1	no
gene2615	kynA	0.363137	1.24353	1.77586	0	1	1	no
gene2616	PA2580	0	0.55069	inf	0	1	1	no
gene2617	PA2581	9.50978	0.993189	-3.25927	-1.78613	0.018	0.072604	no
gene2618	PA2581.1	0	0	0	0	1	1	no
gene2619	PA2582	0.92672	4.21588	2.18563	0	1	1	no
gene262	PA0261	2.57219	0.752407	-1.77341	0	1	1	no
gene2620	PA2583	1.17276	1.29756	0.145883	0	1	1	no
gene2621	PA2583.1	0	0	0	0	1	1	no
gene2623	uvrC	1.45382	0.844659	-0.78341	0	1	1	no
gene2625	pqsH	0.971246	2.31016	1.25009	0	1	1	no
gene2626	PA2588	0	0.172453	inf	0	1	1	no
gene2627	PA2589	0.735589	0	-inf	0	1	1	no
gene2628	PA2590	0	0.245031	inf	0	1	1	no
gene2629	PA2591	1.90339	0.848367	-1.16581	0	1	1	no
gene263	PA0262	1.68292	0.96339	-0.804777	0	1	1	no
gene2630	PA2592	3.41113	1.33159	-1.35709	0	1	1	no
gene2631	qteE	0	0	0	0	1	1	no
gene2632	PA2594	1.72873	0.18754	-3.20444	0	1	1	no
gene2633	PA2595	0	0.309083	inf	0	1	1	no
gene2634	PA2596	0.309715	0	-inf	0	1	1	no
gene2635	PA2597	0	0	0	0	1	1	no
gene2636	PA2598	0	0	0	0	1	1	no
gene2637	PA2599	0	0.787676	inf	0	1	1	no
gene2638	PA2600	0	0.257246	inf	0	1	1	no
gene2639	PA2601	0.46002	0	-inf	0	1	1	no
gene264	hcpC	0	0	0	0	1	1	no
gene2640	PA2602	0	0.531678	inf	0	1	1	no
gene2641	PA2603	0	0.171063	inf	0	1	1	no
gene2642	PA2603.1	0	0	0	0	1	1	no
gene2643	PA2604	0.36055	1.5496	2.10362	0	1	1	no
gene2644	PA2605	0	0	0	0	1	1	no
gene2645	PA2606	0	0	0	0	1	1	no
gene2646	PA2607	0	0	0	0	1	1	no
gene2647	PA2608	0	1.47985	inf	0	1	1	no
gene2648	PA2609	2.96889	2.36612	-0.327401	0	1	1	no
gene2649	PA2610	0	0.287089	inf	0	1	1	no
gene265	PA0263.1	0	0	0	0	1	1	no
gene2650	cysG	0.954448	1.73971	0.866107	0	1	1	no
gene2651	serS	0.82771	1.74174	1.07333	0	1	1	no
gene2652	PA2613	5.576	8.3643	0.585015	0.834716	0.1429	0.306489	no
gene2653	lolA	2.28664	4.27729	0.90347	0	1	1	no
gene2654	ftsK	3.10273	3.31321	0.0946925	0	1	1	no
gene2655	trxB1	21.5352	25.0904	0.220434	0.405599	0.47695	0.61059	no
gene2656	aat	0	0.290171	inf	0	1	1	no
gene2657	PA2618	2.67693	1.68766	-0.665552	0	1	1	no
gene2658	infA	0	0	0	0	1	1	no
gene2659	clpA	5.99776	6.13571	0.0328057	0	1	1	no
gene266	gabD	1.99159	0.912921	-1.12536	0	1	1	no
gene2660	PA2621	106.122	101.427	-0.0652916	-0.122565	0.8332	0.896823	no
gene2661	cspD	33.0392	19.0937	-0.79108	-0.684262	0.1648	0.326881	no
gene2662	icd	74.9396	49.9861	-0.584203	-1.20309	0.0375	0.127173	no
gene2663	idh	30.7055	21.0314	-0.545954	-1.1175	0.05185	0.153507	no
gene2664	PA2625	1.96269	0.490804	-1.99961	0	1	1	no
gene2665	trmU	1.77329	2.14529	0.274743	0	1	1	no
gene2666	PA2627	0	0	0	0	1	1	no
gene2667	PA2628	0	2.34452	inf	0	1	1	no
gene2668	purB	1.8798	3.84536	1.03254	0	1	1	no
gene2669	PA2630	2.74127	1.01231	-1.43719	0	1	1	no
gene267	PA0266	1.93978	1.43876	-0.431066	0	1	1	no
gene2670	PA2631	0	0	0	0	1	1	no
gene2671	PA2632	0.561583	0.657504	0.227501	0	1	1	no
gene2672	PA2633	1.41526	2.01219	0.507702	0	1	1	no
gene2674	PA2635	0.136729	0.415403	1.60319	0	1	1	no
gene2675	PA2636	0.657676	0.987211	0.585982	0	1	1	no
gene2676	nuoA	9.16896	22.6639	1.30556	1.25973	0.0398	0.130709	no
gene2677	nuoB	1.35144	2.46011	0.864233	0	1	1	no
gene2678	nuoD	4.75352	3.88502	-0.291076	0	1	1	no
gene2679	nuoE	1.30024	0.447001	-1.54043	0	1	1	no
gene268	PA0267	0.491172	0	-inf	0	1	1	no
gene2680	nuoF	1.76294	1.79861	0.0289046	0	1	1	no
gene2681	nuoG	1.444	1.0755	-0.42507	0	1	1	no
gene2682	nuoH	0.526317	1.96597	1.90124	0	1	1	no
gene2683	nuoI	0.668051	0	-inf	0	1	1	no
gene2684	nuoJ	0	0.745486	inf	0	1	1	no
gene2685	nuoK	0	0	0	0	1	1	no
gene2686	nuoL	1.03117	1.34111	0.379145	0	1	1	no
gene2687	nuoM	0.268808	0.557011	1.05113	0	1	1	no
gene2688	nuoN	0.791258	1.0037	0.343112	0	1	1	no
gene2689	PA2650	0.918781	1.18615	0.368497	0	1	1	no
gene269	PA0268	0.266048	0.184315	-0.529513	0	1	1	no
gene2690	PA2651	1.51391	1.31954	-0.198249	0	1	1	no
gene2691	PA2652	0.439011	0.568755	0.373549	0	1	1	no
gene2692	PA2653	0.218788	0	-inf	0	1	1	no
gene2693	PA2654	0.830769	0.600139	-0.46915	0	1	1	no
gene2694	PA2655	0	0	0	0	1	1	no
gene2695	PA2656	0.216538	1.3535	2.644	0	1	1	no
gene2696	PA2657	0.504522	0	-inf	0	1	1	no
gene2697	PA2658	0	0.975208	inf	0	1	1	no
gene2698	PA2659	2.93404	5.52096	0.912028	0	1	1	no
gene2699	PA2660	0.277103	0.253004	-0.131262	0	1	1	no
gene27	PA0028	0.413831	0.535375	0.371511	0	1	1	no
gene270	PA0269	0	0	0	0	1	1	no
gene2700	PA2661	0	0.336351	inf	0	1	1	no
gene2701	PA2662	0.247027	0.289259	0.227694	0	1	1	no
gene2702	ppyR	2.57714	2.37774	-0.116184	0	1	1	no
gene2703	fhp	0.869728	0.83086	-0.0659584	0	1	1	no
gene2704	PA2665	0.132094	0.738341	2.48272	0	1	1	no
gene2705	PA2666	0	1.54864	inf	0	1	1	no
gene2706	PA2667	0	2.35801	inf	0	1	1	no
gene2708	PA2669	0	0.558679	inf	0	1	1	no
gene2709	PA2670	0	0.478927	inf	0	1	1	no
gene271	PA0270	0	0	0	0	1	1	no
gene2710	PA2671	0	0	0	0	1	1	no
gene2711	PA2672	0	0	0	0	1	1	no
gene2712	PA2673	0	0	0	0	1	1	no
gene2713	PA2674	1.04443	0	-inf	0	1	1	no
gene2714	PA2675	0.661656	0.555867	-0.25134	0	1	1	no
gene2715	PA2676	0	0.529225	inf	0	1	1	no
gene2716	PA2677	0	1.63873	inf	0	1	1	no
gene2717	PA2678	9.61798	9.31965	-0.0454571	-0.0568336	0.94255	0.963389	no
gene2718	PA2679	0	0.254277	inf	0	1	1	no
gene2719	PA2680	0	0.287089	inf	0	1	1	no
gene272	PA0271	0	0	0	0	1	1	no
gene2720	PA2681	0	0	0	0	1	1	no
gene2721	PA2682	0	0	0	0	1	1	no
gene2722	PA2683	2.11445	0.956561	-1.14435	0	1	1	no
gene2723	PA2684	0.806883	0.199954	-2.01269	0	1	1	no
gene2725	pfeR	0	0.198089	inf	0	1	1	no
gene2726	pfeS	0.155865	0.450008	1.52966	0	1	1	no
gene2727	pfeA	0	0.227843	inf	0	1	1	no
gene2728	PA2689	0.339699	0	-inf	0	1	1	no
gene2729	PA2690	0	0	0	0	1	1	no
gene273	PA0272	0	0.621894	inf	0	1	1	no
gene2730	PA2691	0	0	0	0	1	1	no
gene2731	PA2692	0	1.76472	inf	0	1	1	no
gene2732	PA2693	1.07186	0.700565	-0.613521	0	1	1	no
gene2733	PA2694	0	0	0	0	1	1	no
gene2734	PA2695	0.194885	0.418502	1.10261	0	1	1	no
gene2735	PA2696	0	0	0	0	1	1	no
gene2736	PA2697	0	3.16345	inf	0	1	1	no
gene2737	PA2698	0	0.580343	inf	0	1	1	no
gene2738	PA2699	0	0.0886925	inf	0	1	1	no
gene2739	opdB	0	0.130125	inf	0	1	1	no
gene274	PA0273	0	0	0	0	1	1	no
gene2740	PA2701	0	0	0	0	1	1	no
gene2741	PA2702	0	0.481389	inf	0	1	1	no
gene2742	PA2703	6.27458	0	-inf	0	1	1	no
gene2743	PA2704	0	0	0	0	1	1	no
gene2744	PA2705	0.24996	0.707543	1.50112	0	1	1	no
gene2745	PA2706	0	0	0	0	1	1	no
gene2746	PA2707	9.5145	3.79232	-1.32705	-1.29155	0.0591	0.165205	no
gene2747	PA2708	0	0.413878	inf	0	1	1	no
gene2748	cysK	3.28015	1.73047	-0.9226	0	1	1	no
gene2749	PA2710	0	0	0	0	1	1	no
gene275	PA0274	0	0	0	0	1	1	no
gene2750	PA2711	0.548788	0.777197	0.502033	0	1	1	no
gene2751	PA2712	0	1.44462	inf	0	1	1	no
gene2752	PA2713	0	0	0	0	1	1	no
gene2753	PA2714	0.118125	0	-inf	0	1	1	no
gene2754	PA2715	0	1.34906	inf	0	1	1	no
gene2755	PA2716	0	0.138924	inf	0	1	1	no
gene2756	cpo	0.382953	0.368895	-0.0539577	0	1	1	no
gene2757	PA2718	0	0.72684	inf	0	1	1	no
gene2758	PA2719	0	1.23403	inf	0	1	1	no
gene2759	PA2720	5.07659	7.69531	0.600118	0.511146	0.34565	0.498527	no
gene276	PA0275	0.348307	0.448032	0.363242	0	1	1	no
gene2760	PA2721	0	0	0	0	1	1	no
gene2761	PA2722	0	0	0	0	1	1	no
gene2762	PA2723	0	0	0	0	1	1	no
gene2763	PA2724	0.911499	0	-inf	0	1	1	no
gene2764	PA2725	1.49859	0.669109	-1.16329	0	1	1	no
gene2765	PA2726	0	0	0	0	1	1	no
gene2767	PA2729	1.53573	0.205273	-2.90331	0	1	1	no
gene2768	PA2730	9.20988	6.701	-0.458807	-0.60349	0.30335	0.472534	no
gene2769	PA2732	7.08737	13.4985	0.929472	1.2919	0.0283	0.10124	no
gene277	PA0276	0.731418	0	-inf	0	1	1	no
gene2770	PA2733	69.9463	93.543	0.419381	0.560483	0.3317	0.489837	no
gene2771	PA2734	39.0375	30.5433	-0.354006	-0.70899	0.2116	0.380753	no
gene2773	PA2736	1.35307	0.786004	-0.783629	0	1	1	no
gene2774	PA2736.1	0	0	0	0	1	1	no
gene2775	PA2737	9.0299	9.95817	0.141172	0.0896638	0.888	0.934655	no
gene2776	himA	25.818	38.0278	0.558678	0.61305	0.29055	0.461959	no
gene2777	pheT	0.597029	1.74551	1.54777	0	1	1	no
gene2778	pheS	0.394309	1.94521	2.30253	0	1	1	no
gene2779	rplT	12.1526	18.5972	0.613823	0.517225	0.33995	0.494664	no
gene278	PA0277	12.4961	0.896334	-3.80129	-2.11014	0.2395	0.407761	no
gene2780	rpmI	125.42	96.5917	-0.376799	-0.470596	0.4404	0.583234	no
gene2781	infC	199.23	247.051	0.310376	0.537746	0.357	0.509637	no
gene2782	thrS	17.8688	14.8556	-0.266439	-0.253742	0.65835	0.774257	no
gene2783	PA2744.1	0	0	0	0	1	1	no
gene2784	PA2745	0	0.213531	inf	0	1	1	no
gene2785	PA2746	2.14256	0	-inf	0	1	1	no
gene2786	PA2746a	0	0	0	0	1	1	no
gene2787	PA2747	2.80218	0	-inf	0	1	1	no
gene2788	PA2747a	0	0	0	0	1	1	no
gene2789	PA2748	0	0	0	0	1	1	no
gene279	PA0278	0	0	0	0	1	1	no
gene2790	endA	0	0	0	0	1	1	no
gene2791	PA2750	0.725173	0	-inf	0	1	1	no
gene2792	PA2750a	2.15404	3.37687	0.648642	0	1	1	no
gene2793	PA2751	0.458111	1.05623	1.20516	0	1	1	no
gene2794	PA2752	0	0	0	0	1	1	no
gene2795	PA2753	0.838999	1.1226	0.420106	0	1	1	no
gene2796	PA2754	4.62602	3.73285	-0.309496	0	1	1	no
gene2797	PA2754a	0	0	0	0	1	1	no
gene2798	PA2755a	0	0	0	0	1	1	no
gene2799	eco	31.7758	3.88421	-3.03224	-2.02845	0.05745	0.164416	no
gene28	PA0029	0	0	0	0	1	1	no
gene280	PA0279	0	0	0	0	1	1	no
gene2800	PA2756	1.27678	2.60119	1.02666	0	1	1	no
gene2801	PA2757	0.641191	0	-inf	0	1	1	no
gene2802	PA2758	0	0.867619	inf	0	1	1	no
gene2803	PA2759	0	0	0	0	1	1	no
gene2804	PA2760	11.7253	8.10341	-0.533023	-0.855092	0.14065	0.30627	no
gene2805	PA2761	1.37026	3.06284	1.16042	0	1	1	no
gene2806	PA2762	0	1.4067	inf	0	1	1	no
gene2807	PA2763	0	0	0	0	1	1	no
gene2808	PA2763a	0	0	0	0	1	1	no
gene2809	PA2764	0.68498	0.74725	0.125529	0	1	1	no
gene281	cysA	0.221567	0	-inf	0	1	1	no
gene2810	PA2765	2.72713	0.53653	-2.34565	0	1	1	no
gene2811	PA2766	0	0	0	0	1	1	no
gene2812	PA2767	0.734908	2.41877	1.71864	0	1	1	no
gene2813	PA2768	1.07955	1.52971	0.502832	0	1	1	no
gene2814	PA2769	0	0	0	0	1	1	no
gene2815	PA2770	3.08282	1.24473	-1.30841	0	1	1	no
gene2816	PA2771	0	0	0	0	1	1	no
gene2817	PA2772	0	0	0	0	1	1	no
gene2818	PA2772a	0	0	0	0	1	1	no
gene2819	PA2773	0	1.12098	inf	0	1	1	no
gene282	cysW	1.34361	1.64386	0.290973	0	1	1	no
gene2820	PA2774	1.03407	2.23994	1.11513	0	1	1	no
gene2821	PA2775	1.59617	2.39591	0.585962	0	1	1	no
gene2822	PA2775.1	0	0	0	0	1	1	no
gene2823	PA2776	1.33614	3.37381	1.33631	0	1	1	no
gene2824	PA2777	0	0.376512	inf	0	1	1	no
gene2825	PA2778	0	0.874986	inf	0	1	1	no
gene2826	PA2779	0	2.36006	inf	0	1	1	no
gene2827	PA2780	2.83697	1.30548	-1.11976	0	1	1	no
gene2828	PA2781	4.90735	1.6727	-1.55277	0	1	1	no
gene2829	PA2782	0	0	0	0	1	1	no
gene283	cysT	1.57483	1.56483	-0.00918835	0	1	1	no
gene2830	PA2783	0	0.239073	inf	0	1	1	no
gene2831	PA2784	0	0	0	0	1	1	no
gene2832	PA2785	0	0	0	0	1	1	no
gene2833	PA2786	0	0	0	0	1	1	no
gene2834	cpg2	0.311889	0.36532	0.228127	0	1	1	no
gene2835	PA2788	0.433801	0.435206	0.00466522	0	1	1	no
gene2836	PA2789	0	0.429621	inf	0	1	1	no
[truncated: 3,546 more rows]

## Sheet: significant_upregulated
Gene ID	Gene Name	Value 1	Value 2	log2 (fold change)	Test Statistics	p value	q value
gene4634	clpB	21.5321	641.183	4.89618	10.3745	5e-05	0.000698837
gene791	PA0779	16.2477	308.424	4.24661	8.52567	5e-05	0.000698837
gene4562	PA4474	1.57511	19.704	3.64497	3.83695	0.00325	0.0224511
gene4873	dnaK	31.4943	360.251	3.51584	7.06391	5e-05	0.000698837
gene4874	grpE	16.8391	184.341	3.45249	5.52579	5e-05	0.000698837
gene583	dnaG	4.13693	35.1505	3.08691	5.14367	5e-05	0.000698837
gene4872	dnaJ	18.0378	149.49	3.05095	5.85741	5e-05	0.000698837
gene4983	PA4870	6.29367	50.96	3.01739	2.55899	0.0056	0.0323615
gene1625	htpG	8.62707	61.2625	2.82806	5.19305	5e-05	0.000698837
gene4871	dapB	1.20712	8.33066	2.78687	1.4514	0.00925	0.0448327
gene920	rsmA	3626.1	22913.4	2.6597	5.64019	5e-05	0.000698837
gene5125	waaG	1.80622	10.3941	2.52472	2.08787	0.0063	0.0346941
gene1439	PA1414	8.59171	47.2851	2.46037	2.24087	0.00385	0.0247286
gene5168	hslV	6.10316	32.0818	2.39413	2.24884	0.00475	0.0282649
gene4470	groEL	100.754	519.342	2.36584	4.78994	5e-05	0.000698837
gene582	rpoD	23.8147	118.195	2.31124	4.5964	5e-05	0.000698837
gene4132	PA4061	8.92965	42.6481	2.25581	3.53421	5e-05	0.000698837
gene3889	PA3819	12.7016	59.714	2.23305	3.08932	0.0001	0.00130652
gene5058	PA4943	6.4703	27.5441	2.08984	3.39868	5e-05	0.000698837
gene775	mucA	31.219	126.381	2.01728	3.61801	5e-05	0.000698837
gene3881	hscB	6.52321	25.7193	1.9792	2.02124	0.00635	0.0346941
gene5169	hslU	6.96398	26.8164	1.94513	3.28447	5e-05	0.000698837
gene2624	gacA	6.74877	21.7267	1.68678	2.04244	0.00395	0.0247286
gene672	tyrZ	12.4244	39.5589	1.67082	2.95304	5e-05	0.000698837
gene1839	lon	32.829	101.139	1.6233	3.26832	5e-05	0.000698837
gene1803	cmaX	3.33028	10.2239	1.61823	1.72921	0.00745	0.0385256
gene5020	PA4907	9.76191	26.8597	1.46021	2.09157	0.0021	0.0159759
gene5057	hflK	17.8262	48.4164	1.4415	2.40358	0.00015	0.001803
gene3216	PA3157	9.87412	26.4346	1.4207	2.17387	0.00065	0.00630081
gene1838	clpX	55.3485	145.186	1.39129	2.83085	5e-05	0.000698837
gene1119	fleQ	4.1866	10.8754	1.37722	2.0293	0.00275	0.0196756
gene379	rpoH	16.6811	41.6596	1.32043	2.35423	0.00015	0.001803
gene1202	oprH	40.6783	99.4149	1.2892	2.48325	5e-05	0.000698837
gene846	PA0833	8.50343	20.6183	1.27781	1.71387	0.00785	0.0396458
gene5120	PA5005	5.17934	12.4491	1.2652	1.94415	0.0015	0.01202
gene4832	cbrB	3.4025	8.14844	1.25993	1.6656	0.0091	0.0444642
gene770	PA0758	8.55784	20.1953	1.2387	1.80381	0.0042	0.0257571
gene2622	pgsA	12.2261	28.4189	1.21689	1.6504	0.01045	0.049066
gene3062	topA	8.7912	20.359	1.21153	2.36625	5e-05	0.000698837
gene1075	PA1053	41.8306	93.3374	1.15789	2.02782	0.00105	0.00970846
gene2772	PA2735	30.8456	66.7609	1.11394	2.22459	0.0002	0.00231154
gene5358	rho	12.316	26.3594	1.09778	2.00644	0.00085	0.00810873
gene4882	lldP	4.00184	8.55432	1.09599	1.60525	0.00815	0.0408179
gene5562	PA5436	7.08683	14.5432	1.03713	1.71082	0.00505	0.0294665
gene3027	rne	24.3393	49.8051	1.03301	2.10105	0.00025	0.00268304
gene3884	iscS	24.603	48.5117	0.9795	1.92781	0.00175	0.0136591
gene4784	hitA	10.4753	20.2269	0.949286	1.53913	0.00885	0.0435971
gene727	PA0716	82.3112	157.32	0.934543	1.88924	0.0009	0.00845156
gene1554	zipA	24.8322	45.7464	0.881446	1.65677	0.0039	0.0247286
gene3946	narG	4.40154	8.07275	0.875052	1.61398	0.0061	0.0345435
gene4349	nusG	33.143	60.2758	0.862876	1.51907	0.01085	0.0497775
gene5050	rnr	7.88061	13.4832	0.774781	1.48185	0.01055	0.0491516
gene4862	ftsH	18.7479	30.9454	0.722993	1.46642	0.00975	0.046506
gene2520	PA2486	0	14.7402	inf	-nan	0.00145	0.0119377
gene4941	PA4828	0	12.6143	inf	-nan	5e-05	0.000698837

## Sheet: significant_downregulated
Gene ID	Gene Name	Value 1	Value 2	log2 (fold change)	Test Statistics	p value	q value
gene1688	PA1658	22.6564	0.992143	-4.51323	-4.66897	0.0091	0.0463781
gene1117	PA1095	129.204	7.21324	-4.16286	-3.14279	0.00265	0.0191886
gene4346	PA4272.1	890.17	76.9649	-3.53181	-3.9605	5e-05	0.000698837
gene3798	PA3729	35.579	3.10911	-3.51645	-5.52012	5e-05	0.000698837
gene1686	PA1656	19.5494	2.11828	-3.20616	-3.53665	0.0001	0.00130652
gene3555	PA3488	72.136	8.88402	-3.02143	-5.06997	5e-05	0.000698837
gene5286	arcD	399.882	49.9991	-2.9996	-4.93225	5e-05	0.000698837
gene2724	PA2685	13.6866	1.84111	-2.89412	-3.80312	5e-05	0.000698837
gene96	PA0095	8.16707	1.10164	-2.89017	-2.76659	0.00135	0.0114275
gene982	PA0962	142.736	19.455	-2.87514	-4.35522	5e-05	0.000698837
gene4614	pilA	49.0763	6.75242	-2.86155	-2.53313	0.01025	0.0485059
gene85	PA0084	24.7043	3.69094	-2.7427	-4.03767	5e-05	0.000698837
gene3101	rmf	78.8232	12.3991	-2.66838	-1.41941	0.0094	0.0451952
gene100	PA0099	29.7865	4.74403	-2.65048	-3.77489	5e-05	0.000698837
gene5140	metY	10.9322	1.89052	-2.53173	-2.42142	0.00025	0.00268304
gene4330	rplV	73.7324	13.723	-2.4257	-2.23755	0.0036	0.0243101
gene568	PA0563	74.2912	14.1381	-2.39361	-2.52297	0.00425	0.0258005
gene4663	PA4571	13.6487	2.62789	-2.37679	-3.4702	5e-05	0.000698837
gene4324	rplX	126.547	24.3781	-2.37602	-2.89574	0.0001	0.00130652
gene4331	rpsS	993.38	192.891	-2.36456	-3.71984	5e-05	0.000698837
gene5030	PA4917	16.1805	3.2644	-2.30937	-1.6795	0.0033	0.0225375
gene1784	cysB	63.673	13.7047	-2.21601	-3.32536	5e-05	0.000698837
gene3692	PA3623	14.5214	3.13913	-2.20975	-2.07658	0.0063	0.0346941
gene4615	pilB	7.14771	1.56705	-2.18943	-2.087	0.0085	0.042219
gene5048	rpsF	48.1814	10.7881	-2.15903	-2.29553	0.00685	0.0367576
gene90	PA0089	2.89407	0.709339	-2.02855	-2.53313	0.01025	0.0485059
gene1091	PA1069	7.53594	1.91221	-1.97854	-2.60782	0.00025	0.00268304
gene4828	dksA	933.27	242.762	-1.94275	-3.83989	5e-05	0.000698837
gene1394	PA1369	104.664	30.1285	-1.79656	-3.47606	5e-05	0.000698837
gene4551	PA4463	768.625	225.296	-1.77046	-3.50993	5e-05	0.000698837
gene1586	ccoN2	14.3183	4.55088	-1.65364	-2.45509	0.00045	0.0045839
gene1583	ccoP2	16.7355	5.37344	-1.63899	-2.09732	0.0037	0.0247078
gene5683	atpH	37.3157	12.1271	-1.62154	-2.24178	0.0014	0.0116861
gene411	pilG	43.3645	14.2223	-1.60836	-1.88132	0.0048	0.0282824
gene5288	arcB	458.603	150.822	-1.6044	-3.12551	5e-05	0.000698837
gene1004	pyoS5	52.8453	17.5083	-1.59374	-3.17122	5e-05	0.000698837
gene1456	rsaL	627.92	209.122	-1.58624	-2.86187	5e-05	0.000698837
gene292	oprE	20.563	6.97732	-1.5593	-2.60418	5e-05	0.000698837
gene4352	tufB	29.6318	10.2742	-1.52813	-2.49072	5e-05	0.000698837
gene547	PA0542	65.1469	22.9895	-1.50272	-2.22129	0.0011	0.0100167
gene4138	oprG	27.1767	9.75134	-1.4787	-2.06861	0.0021	0.015976
gene5233	glnA	83.3418	30.4831	-1.45103	-2.97103	5e-05	0.000698837
gene3389	PA3326	23.5314	8.74695	-1.42774	-1.8175	0.007	0.0372301
gene3722	frr	271.131	103.065	-1.39543	-2.83483	5e-05	0.000698837
gene308	PA0306a	39.0824	15.5097	-1.33335	-1.82724	0.00395	0.0247286
gene5035	azu	166.858	66.2508	-1.33261	-2.52071	5e-05	0.000698837
gene2673	aceA	17.8349	7.20472	-1.30769	-2.22915	0.00055	0.00541885
gene1560	PA1533	104.495	42.4434	-1.29983	-2.00187	0.00245	0.0179567
gene5680	atpD	29.3639	12.0031	-1.29064	-2.40291	5e-05	0.000698837
gene5623	nrdJa	8.16542	3.36928	-1.27709	-1.95924	0.0016	0.0126526
gene1176	imm2	134.36	56.4069	-1.25216	-1.83929	0.0038	0.0247286
gene4588	PA4500	8.97191	3.82949	-1.22826	-1.72289	0.00615	0.0345435
gene833	PA0820	25.8366	11.1948	-1.20659	-1.74814	0.0039	0.0247286
gene1535	PA1509	22.776	9.92586	-1.19825	-1.80905	0.00295	0.0206157
gene1457	lasI	62.0684	27.0521	-1.19812	-2.10094	0.0005	0.00500833
gene3201	wbpM	21.5844	9.88673	-1.12643	-2.13953	0.00015	0.001803
gene3907	PA3836	16.2993	7.47594	-1.12448	-1.65887	0.0072	0.0379579
gene656	vfr	25.6241	11.8251	-1.11565	-1.55319	0.0107	0.0494669
gene4399	mvaT	1061.23	491.469	-1.11057	-2.22426	0.00025	0.00268304
gene414	pilJ	13.8071	6.57893	-1.06948	-1.91188	0.0015	0.01202
gene3801	PA3732	230.837	111.46	-1.05035	-2.14155	0.0002	0.00231154
gene3598	bfrB	3320.52	1612.16	-1.04241	-2.13433	0.00035	0.00369035
gene5682	atpA	96.9071	47.1674	-1.03881	-2.14129	0.0004	0.00414483
gene1116	fliD	13.5333	6.6493	-1.02524	-1.65814	0.0066	0.0357351
gene1976	PA1939	8.32965	4.10377	-1.0213	-1.59073	0.0075	0.0385256
gene523	nirS	48.272	24.8277	-0.959236	-1.94776	0.0012	0.0106059
gene5157	pilO	108.242	55.8768	-0.953941	-1.64711	0.0042	0.0257571
gene4451	sodB	285.132	147.322	-0.952659	-1.96854	0.00115	0.0103157
gene4680	ccpR	20.1423	10.4282	-0.949741	-1.57754	0.0077	0.0392178
gene5155	pilQ	12.2848	6.43035	-0.9339	-1.68001	0.00445	0.0267445
gene1613	sdhB	252.039	134.811	-0.902714	-1.85065	0.00135	0.0114275
gene1179	nrdB	63.8121	34.8794	-0.871454	-1.77239	0.0023	0.0172787
gene978	oprD	27.184	14.9777	-0.859943	-1.61922	0.0059	0.0337705
gene1175	pys2	96.6484	53.9177	-0.841987	-1.70527	0.0024	0.0178074
gene3937	PA3866	57.9267	32.6472	-0.827268	-1.70364	0.00285	0.0201512
gene5362	hemB	44.5942	25.3888	-0.812662	-1.57048	0.00735	0.0384117
gene2595	PA2560	11.782	0	-inf	-nan	0.00015	0.001803
gene2851	PA2805	7.48308	0	-inf	-nan	0.00135	0.0114275
